# Supplementary material
Source: ML conference proceedings conference paper supplement (https://openreview.net/forum?id=rnUEUbRxVu)

The figure displays the convergence of 10 parameters over 2000 iterations. The parameters are represented by different colored lines. The purple line shows a significant downward trend, starting near 0.8 and ending near 0.2. The other parameters (grey, orange, light blue, red, brown, white, light orange, green, cyan) fluctuate rapidly around stable mean values, generally between 0.4 and 0.9.

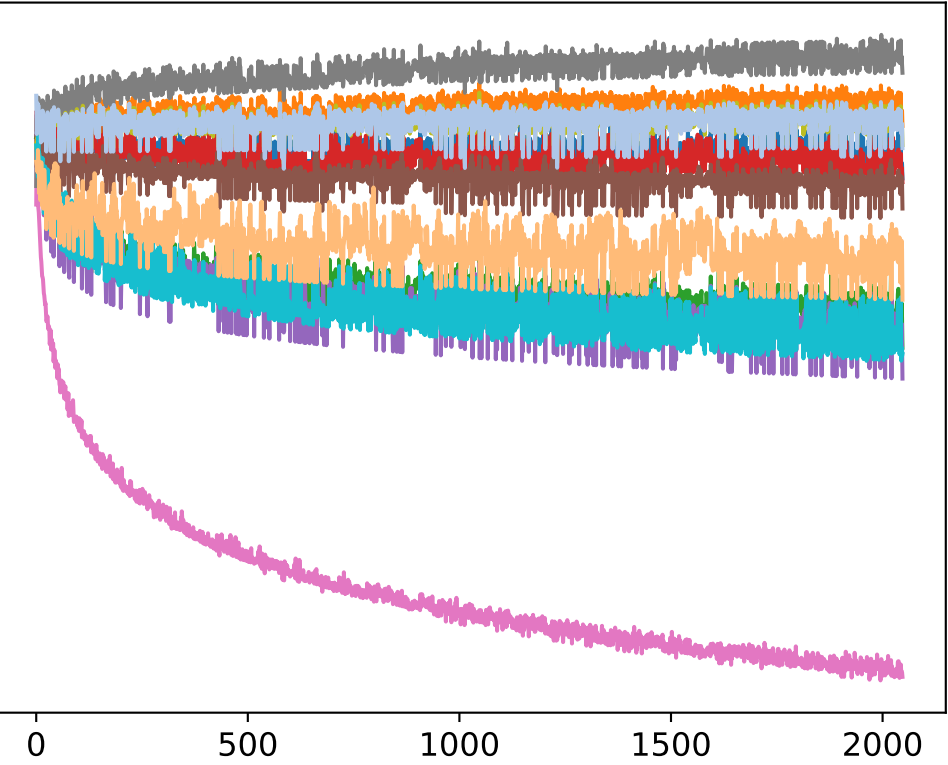

Supplement: supplementary_material [file attachment]
