# Supplementary material (part 2 of 5)
Source: ML conference proceedings conference paper supplement (https://openreview.net/forum?id=rnUEUbRxVu)

Example 1: Final Attention (Layer 9)

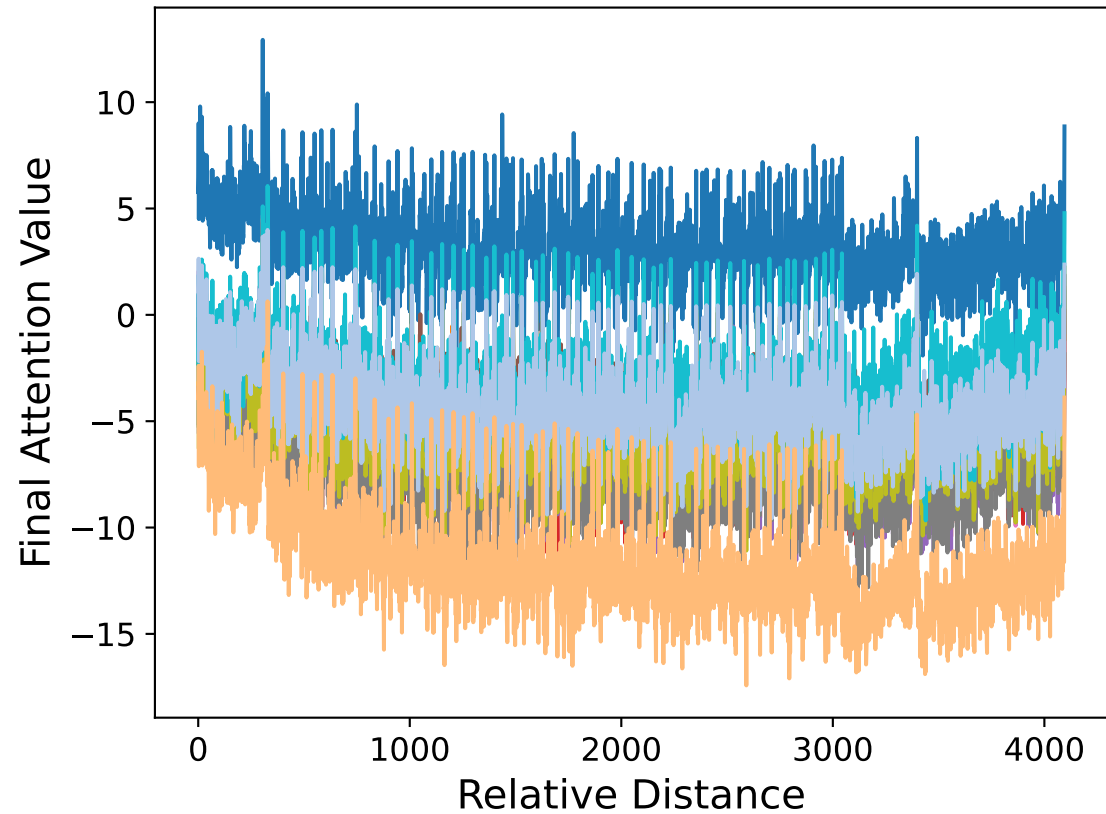

Supplement: supplementary_material [file attachment]

Example 1: DAPE Bias (Layer 7)

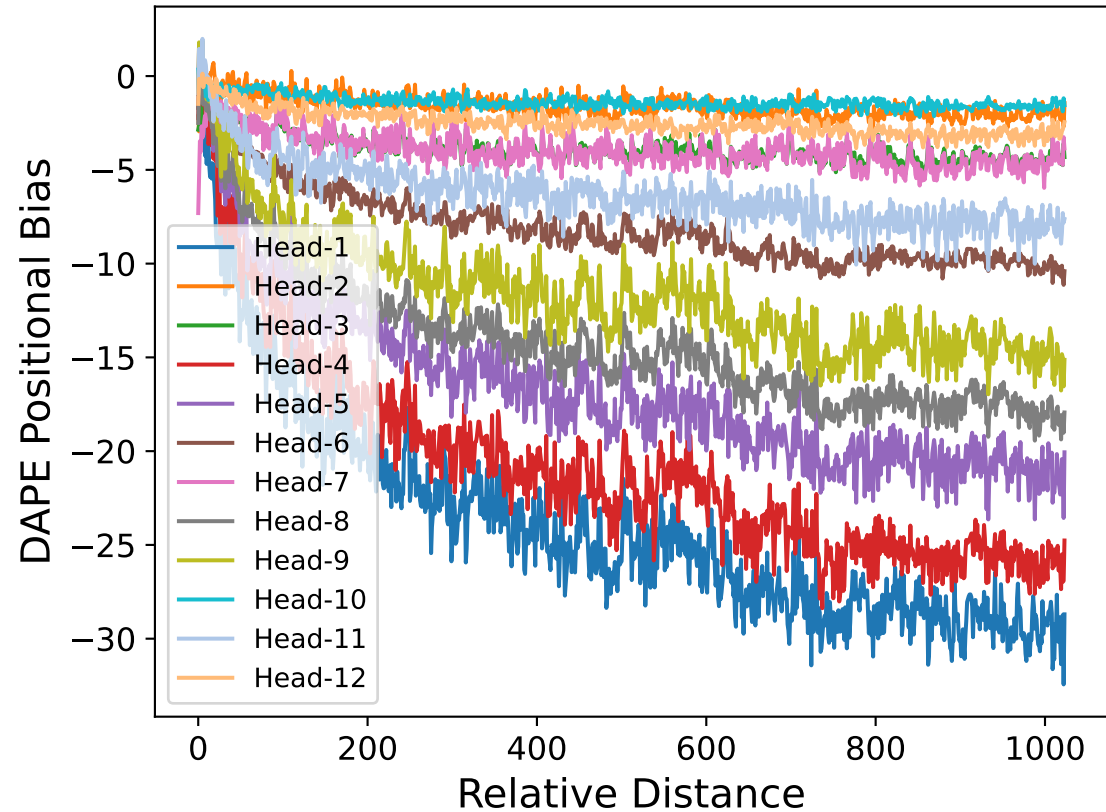

Supplement: supplementary_material [file attachment]

Example 1: Final Attention (Layer 2)

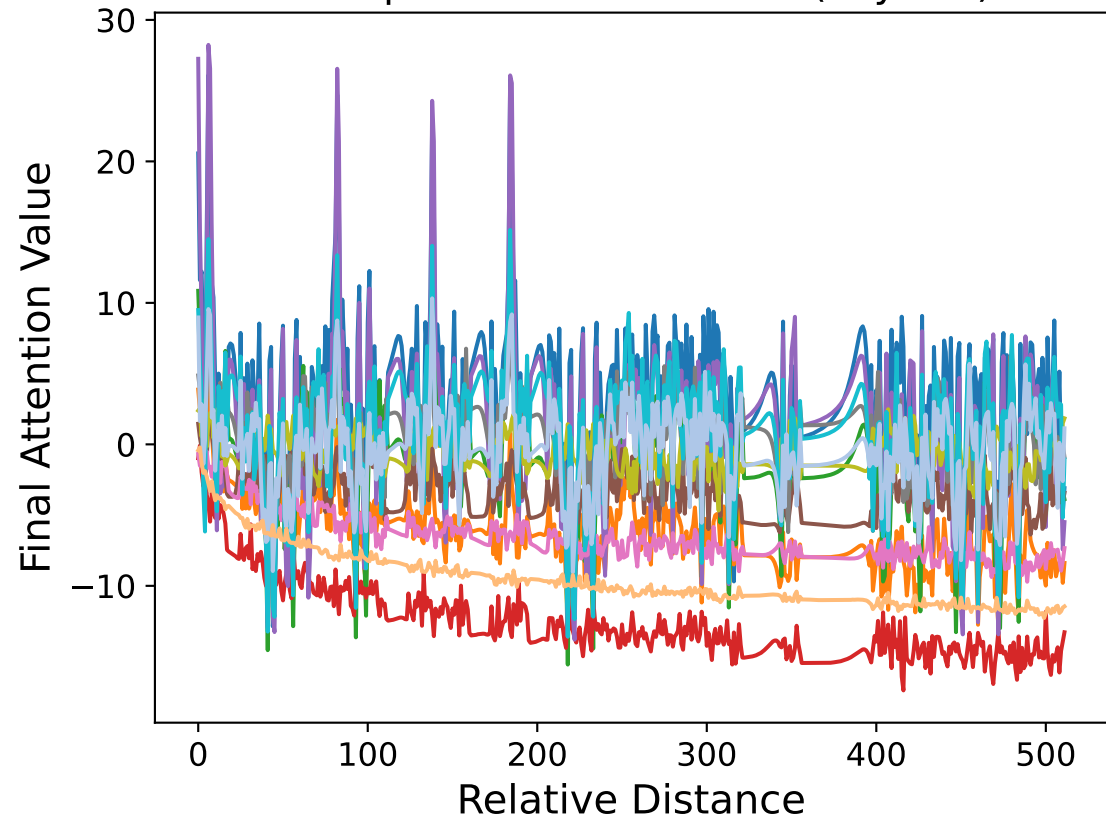

Supplement: supplementary_material [file attachment]

Example 1: Final Attention (Layer 6)

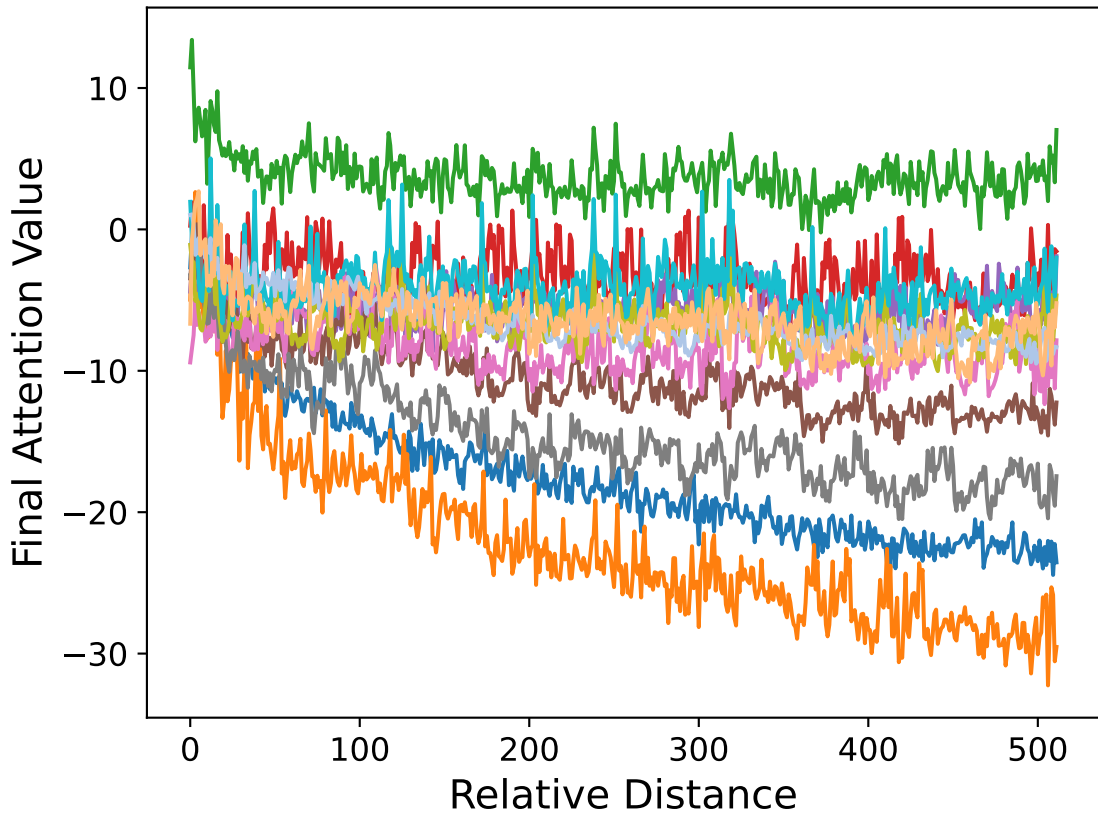

Supplement: supplementary_material [file attachment]

Example 1: Attention (Layer 12)

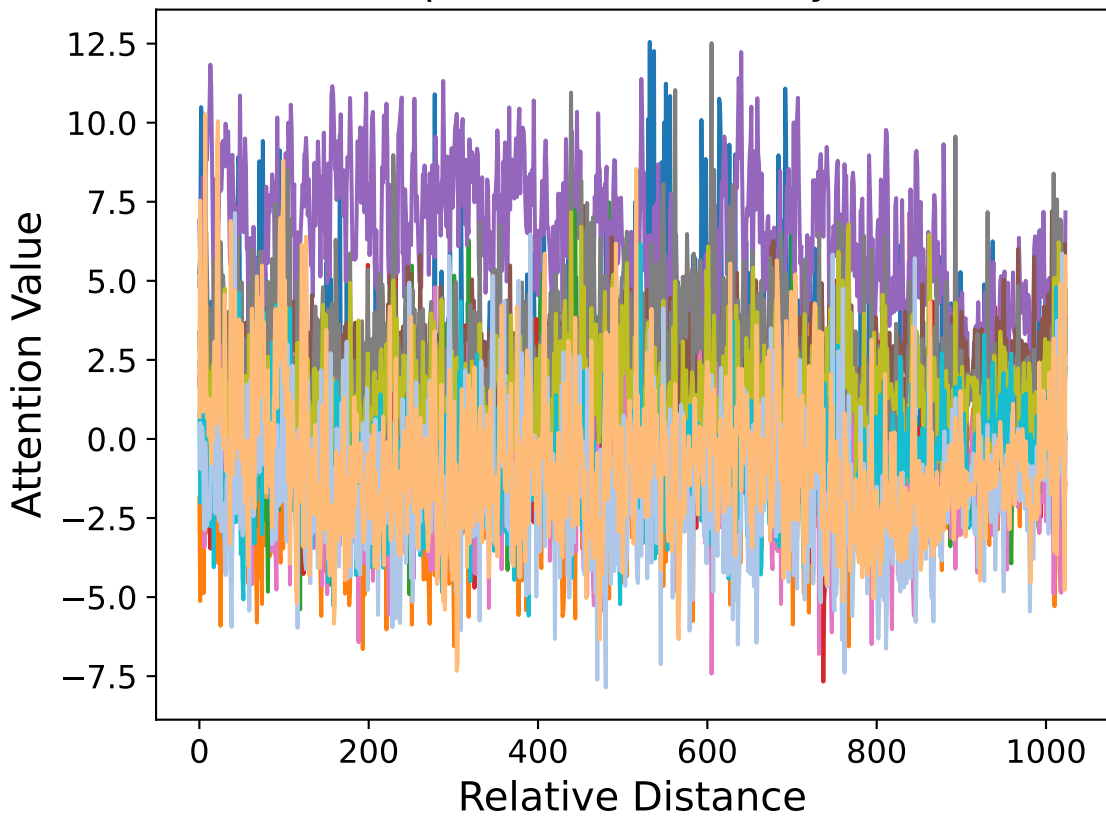

Supplement: supplementary_material [file attachment]

Example 1: Final Attention (Layer 1)

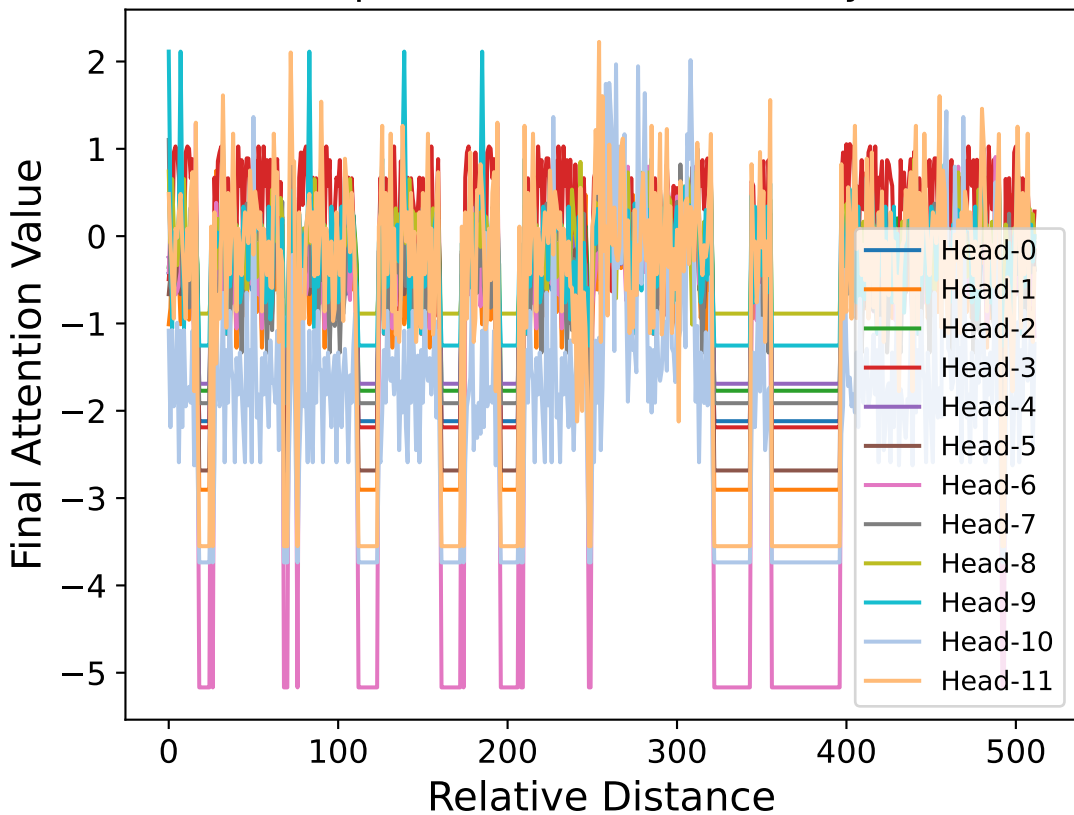

Supplement: supplementary_material [file attachment]

Example 1: Kerple Bias (Layer 10)

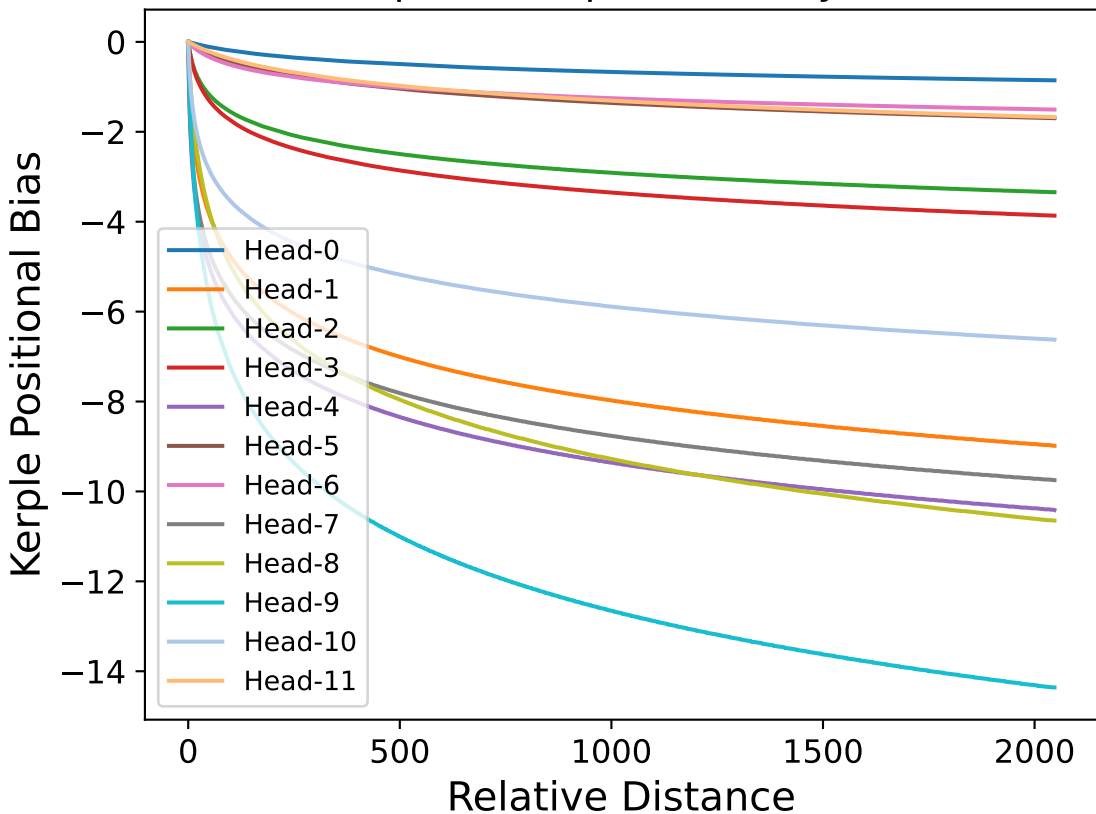

Supplement: supplementary_material [file attachment]

Example 1: Attention (Layer 1)

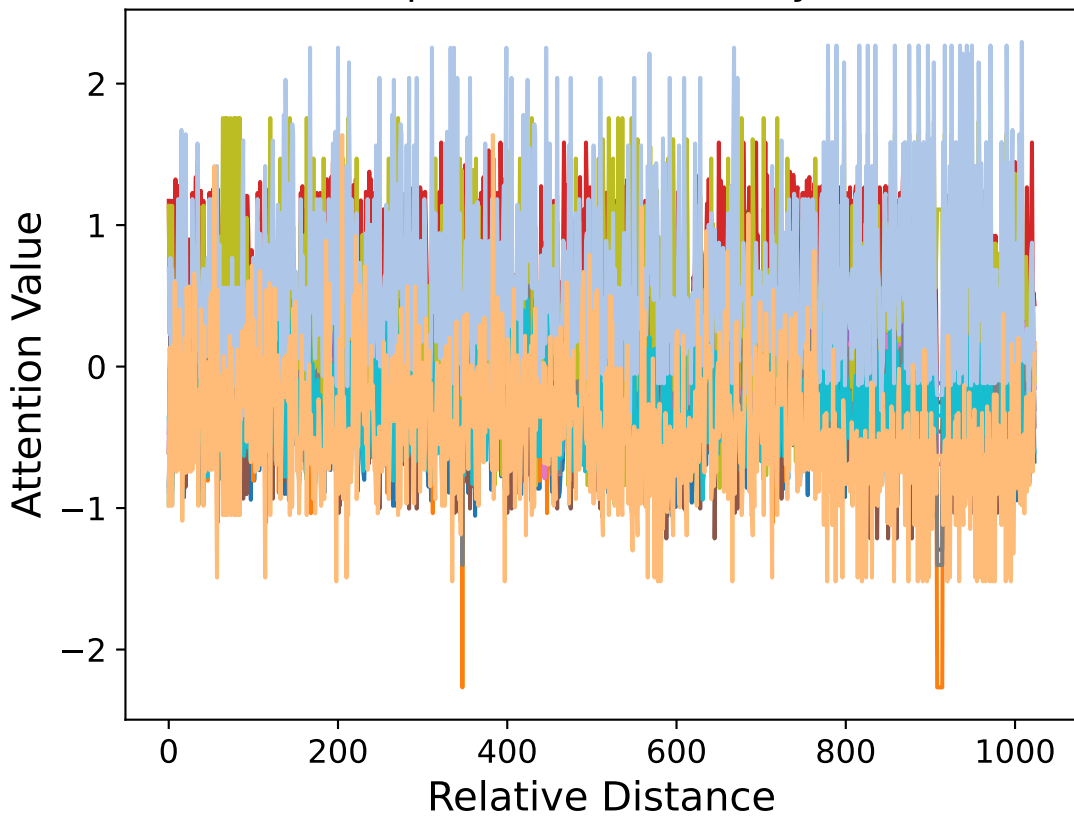

Supplement: supplementary_material [file attachment]

Example 1: Attention (Layer 12)

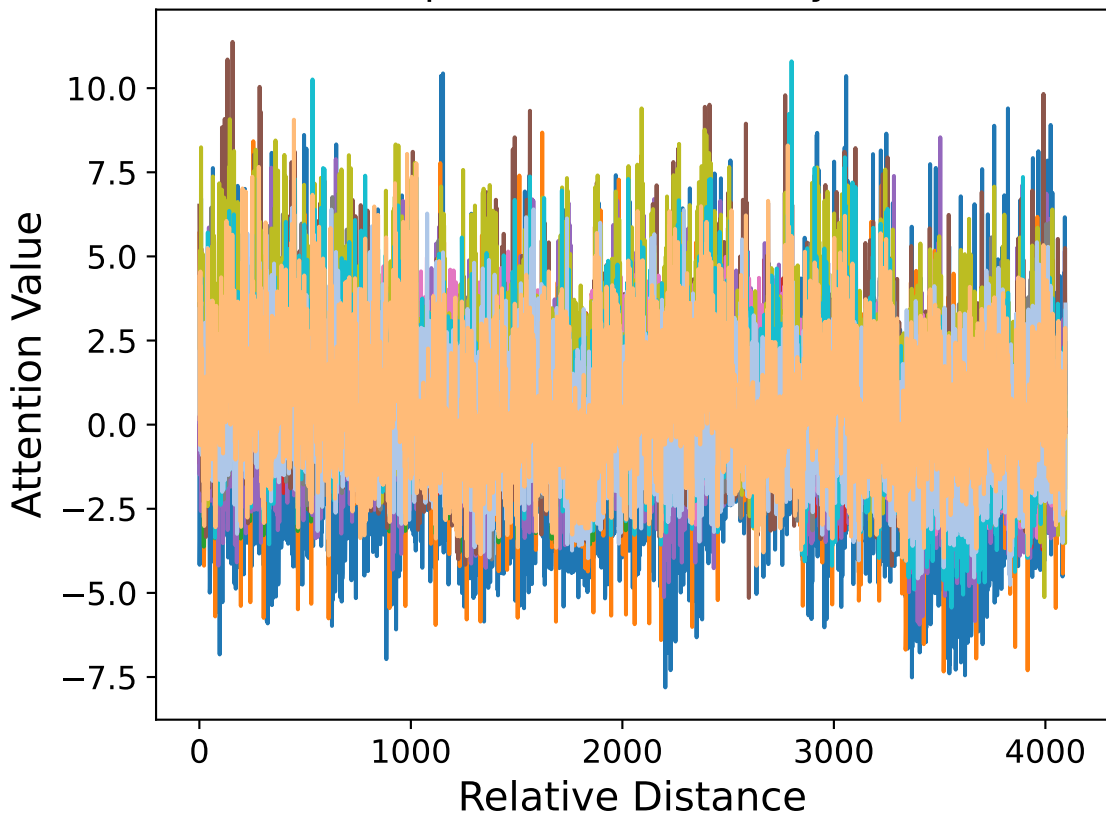

Supplement: supplementary_material [file attachment]

Example 1: Attention (Layer 7)

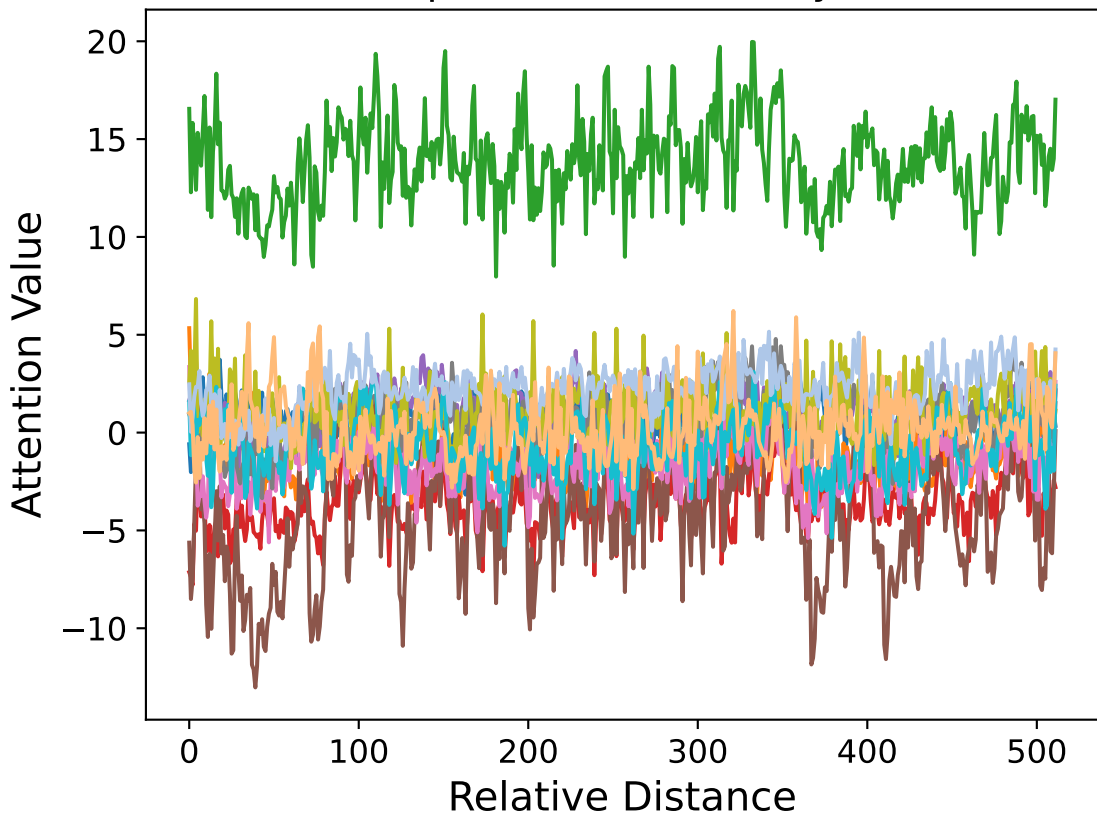

Supplement: supplementary_material [file attachment]

Example 1: DAPE Bias (Layer 1)

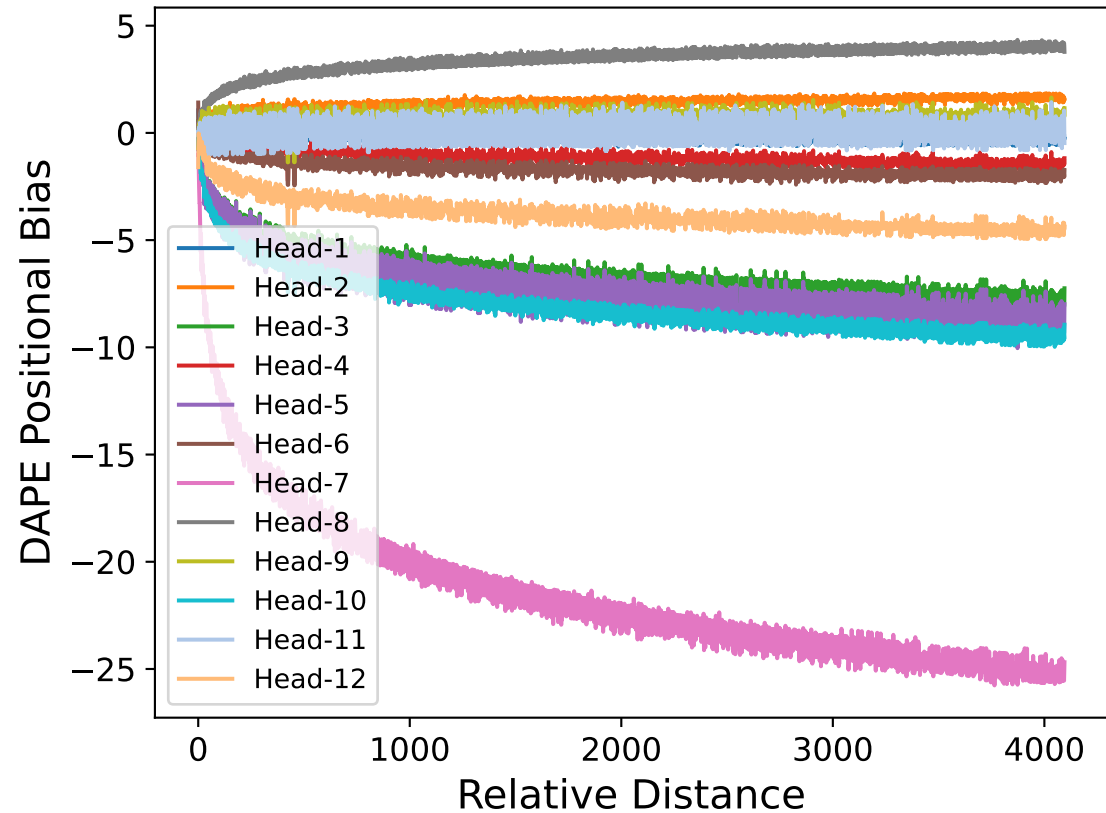

Supplement: supplementary_material [file attachment]

Example 1: DAPE Bias (Layer 10)

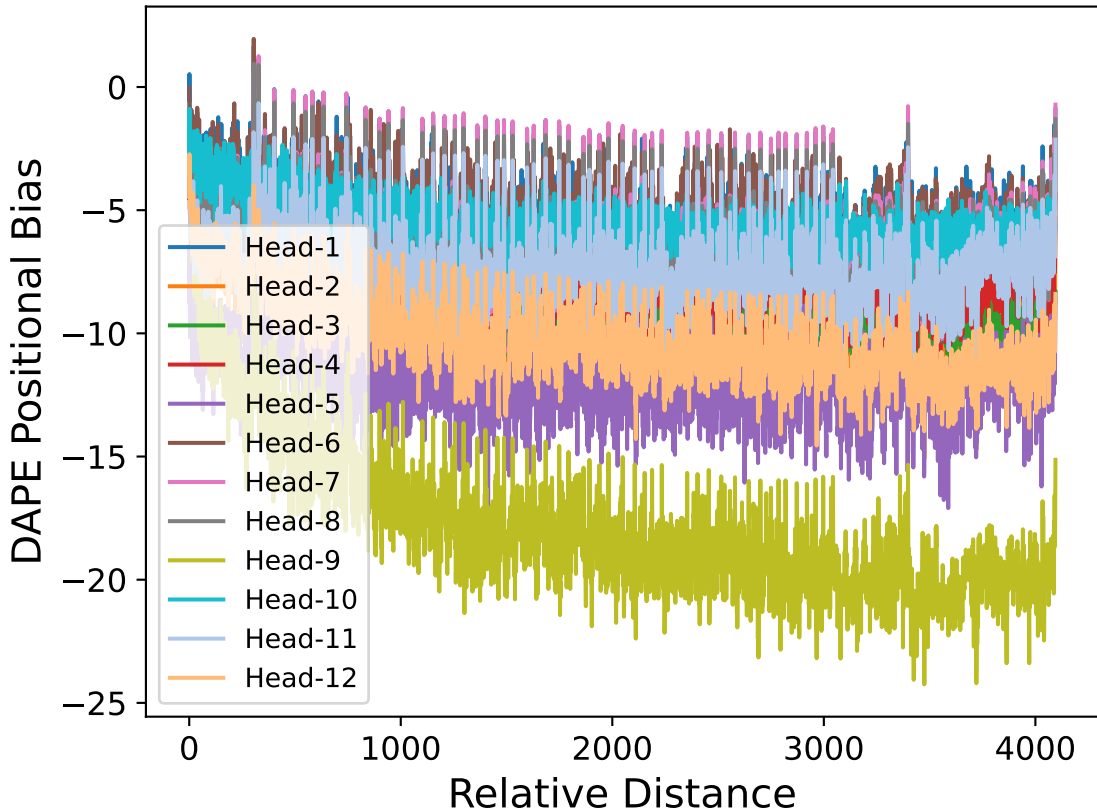

Supplement: supplementary_material [file attachment]

Example 1: Final Attention (Layer 6)

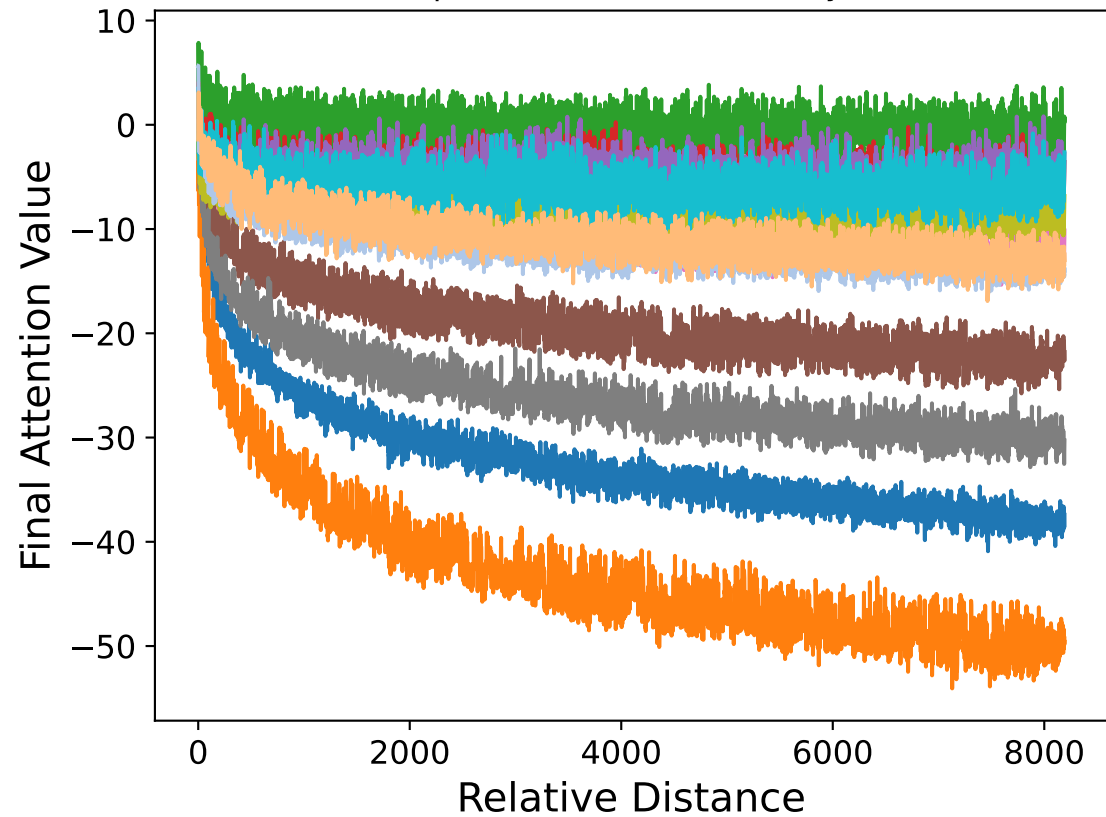

Supplement: supplementary_material [file attachment]

Example 1: Final Attention (Layer 4)

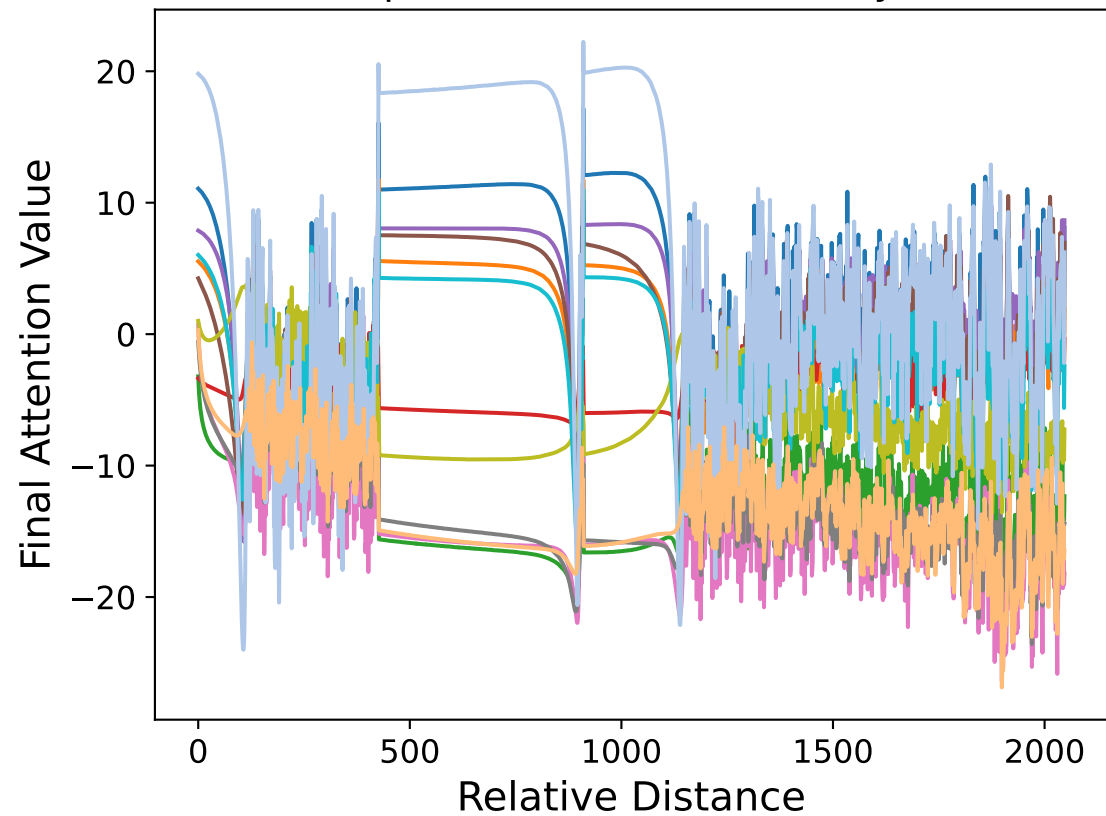

Supplement: supplementary_material [file attachment]

Example 1: Final Attention (Layer 2)

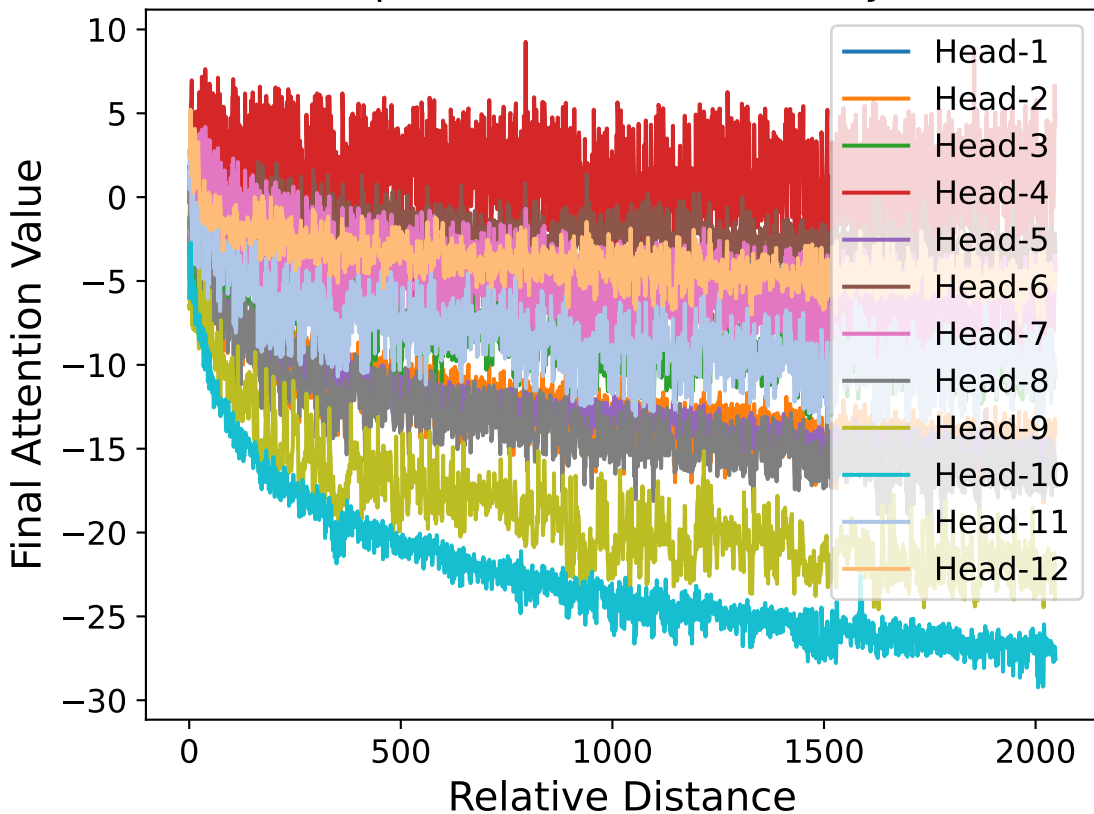

Supplement: supplementary_material [file attachment]

Example 1: DAPE Bias (Layer 7)

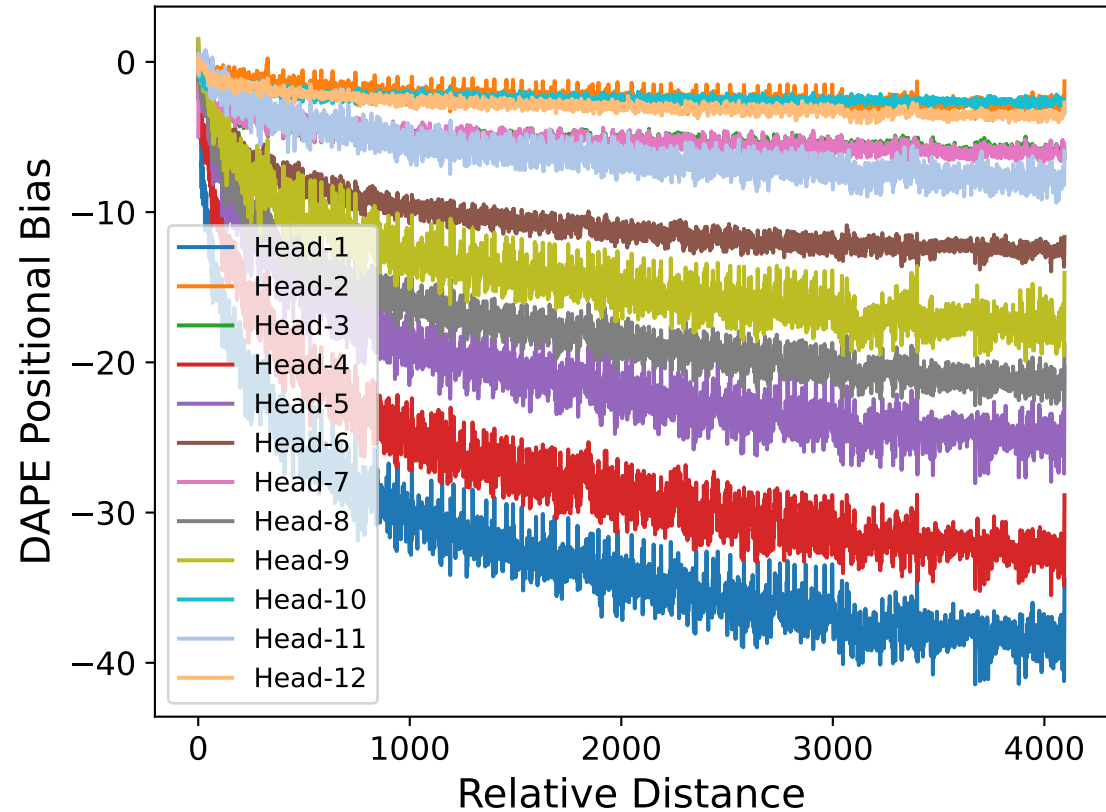

Supplement: supplementary_material [file attachment]

Example 1: Attention (Layer 2)

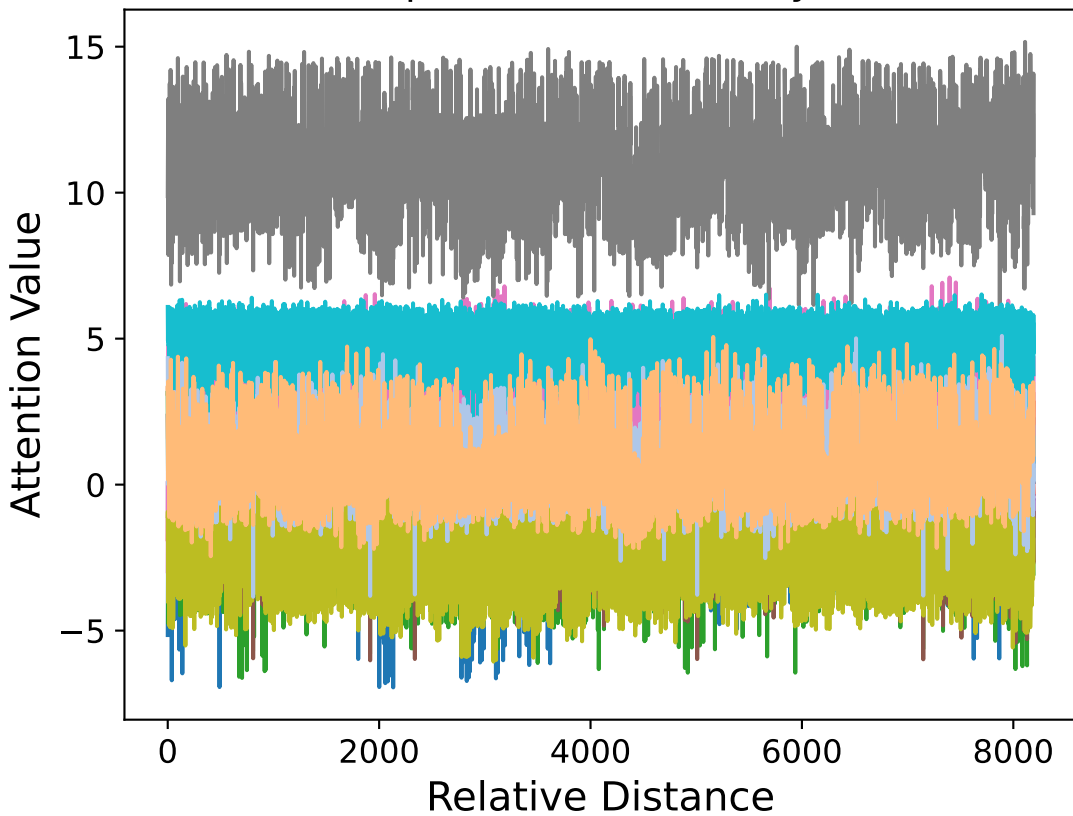

Supplement: supplementary_material [file attachment]

Example 1: Final Attention (Layer 11)

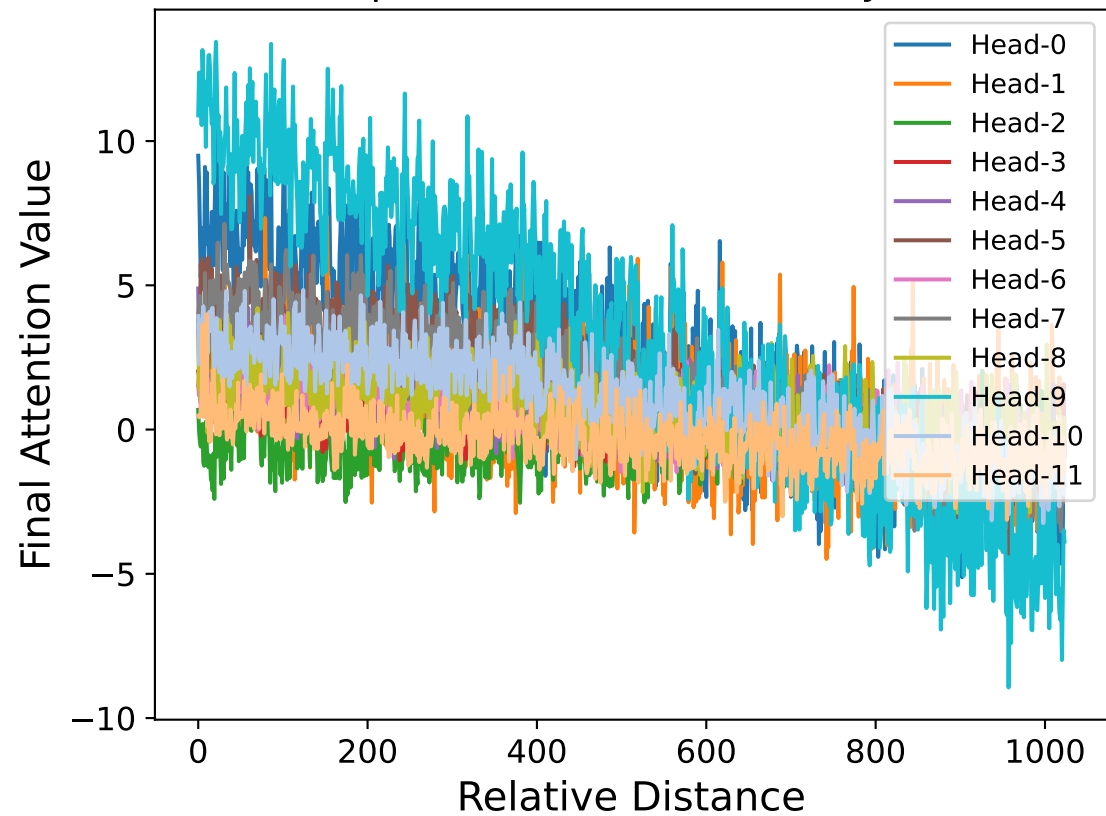

Supplement: supplementary_material [file attachment]

Example 1: Kerple Bias (Layer 12)

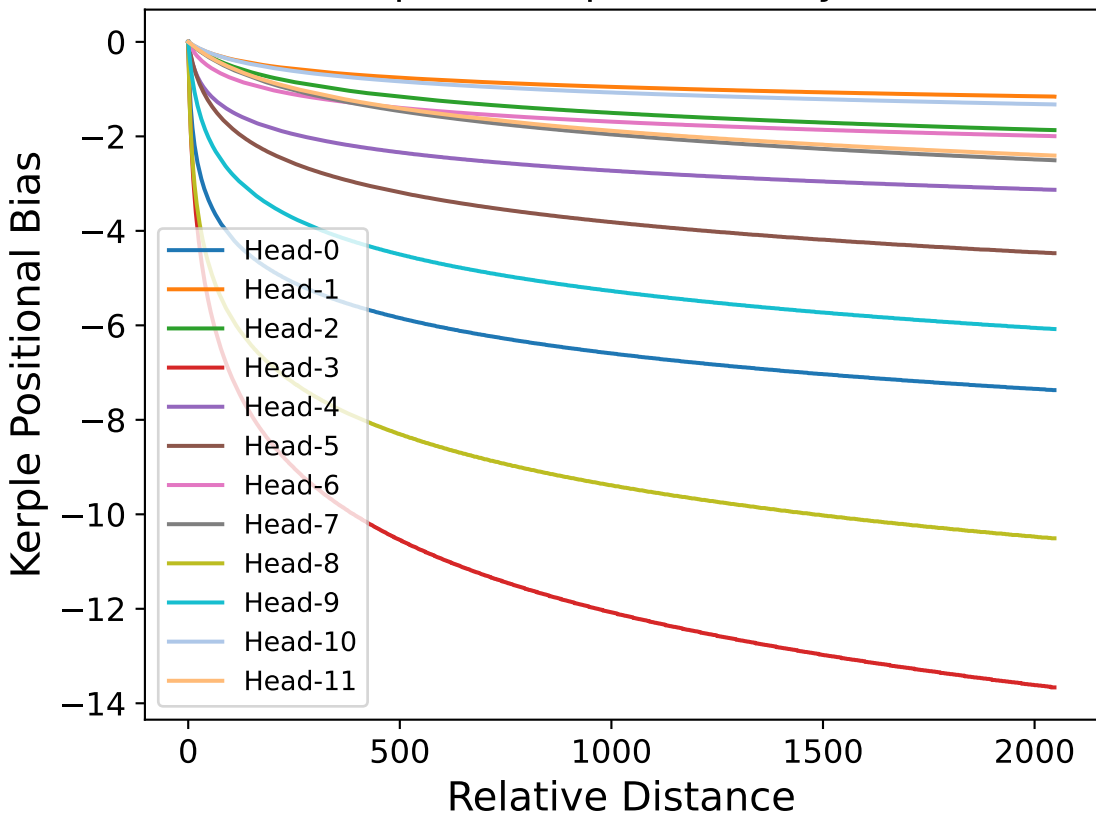

Supplement: supplementary_material [file attachment]

Example 1: Attention (Layer 5)

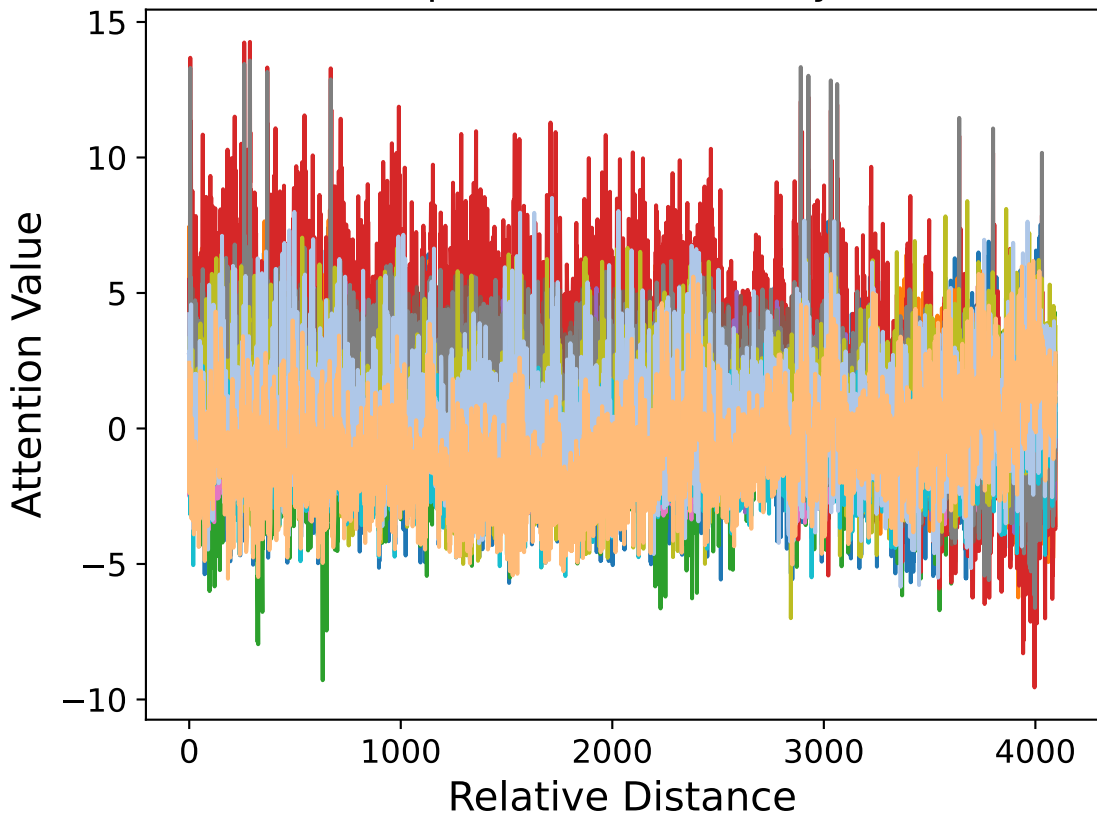

Supplement: supplementary_material [file attachment]

Example 1: Kerple Bias (Layer 6)

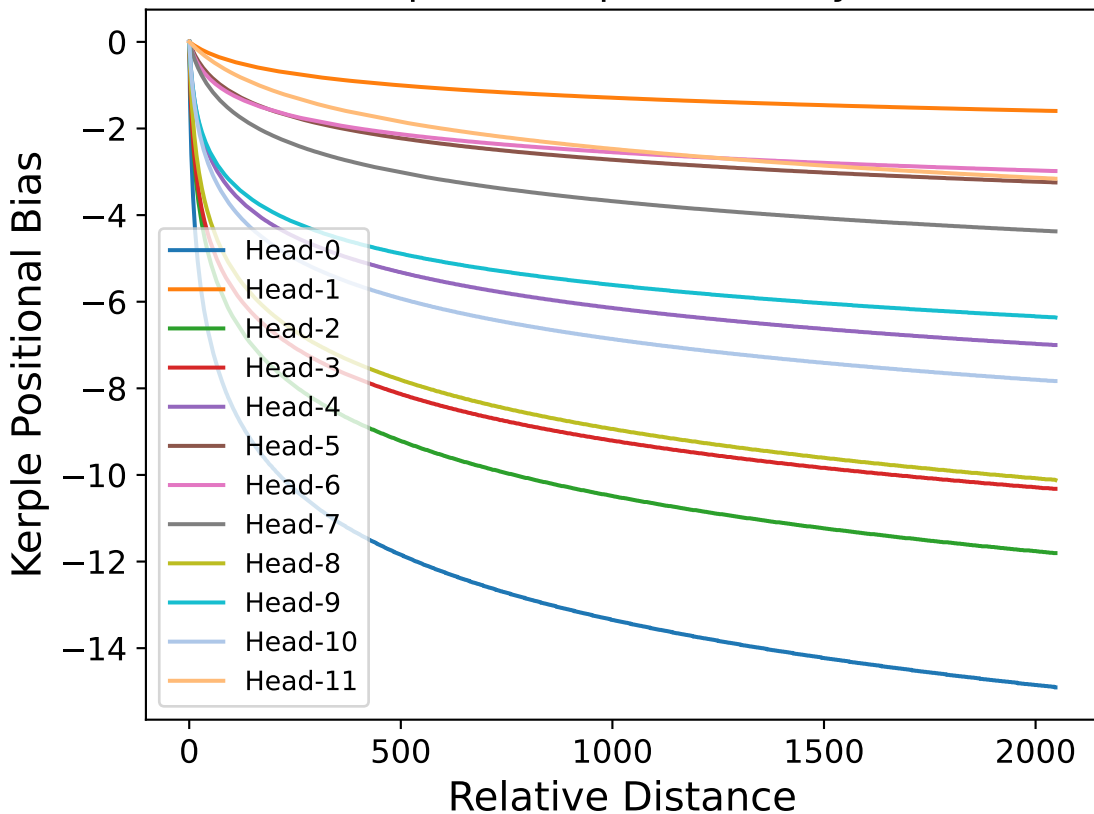

Supplement: supplementary_material [file attachment]

Example 1: Final Attention (Layer 10)

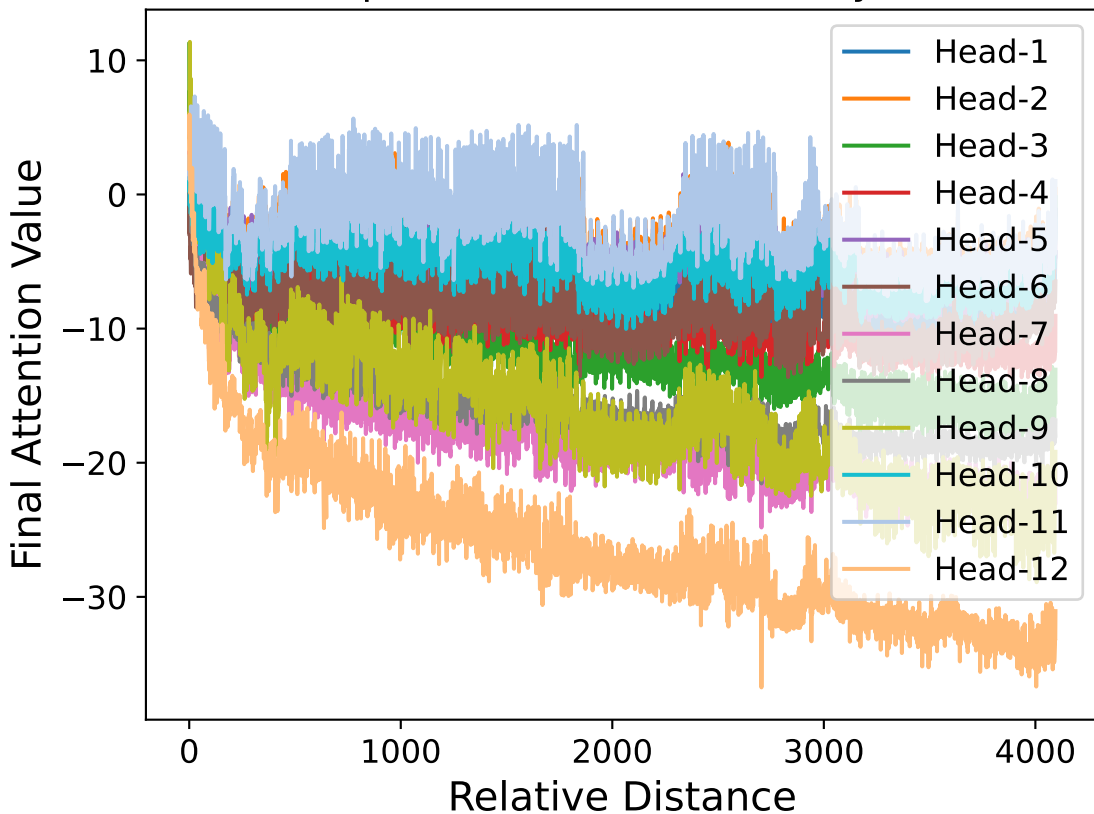

Supplement: supplementary_material [file attachment]

Example 1: Final Attention (Layer 2)

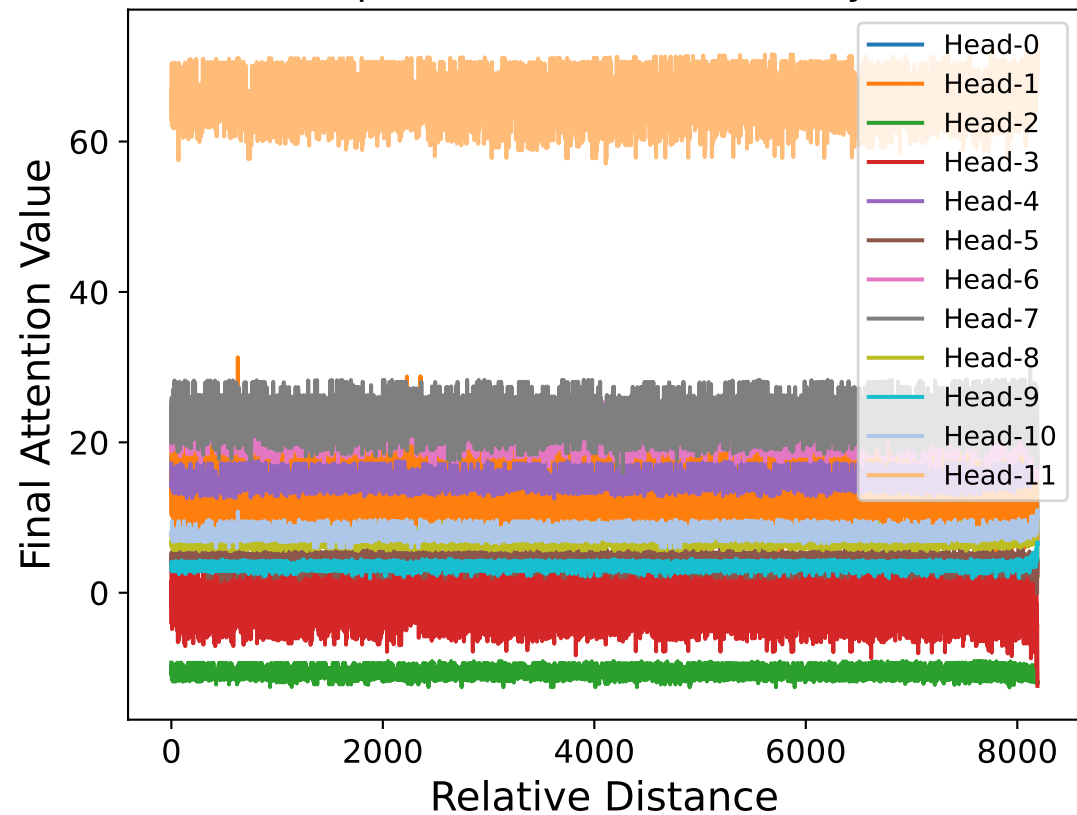

Supplement: supplementary_material [file attachment]

Example 1: Attention (Layer 2)

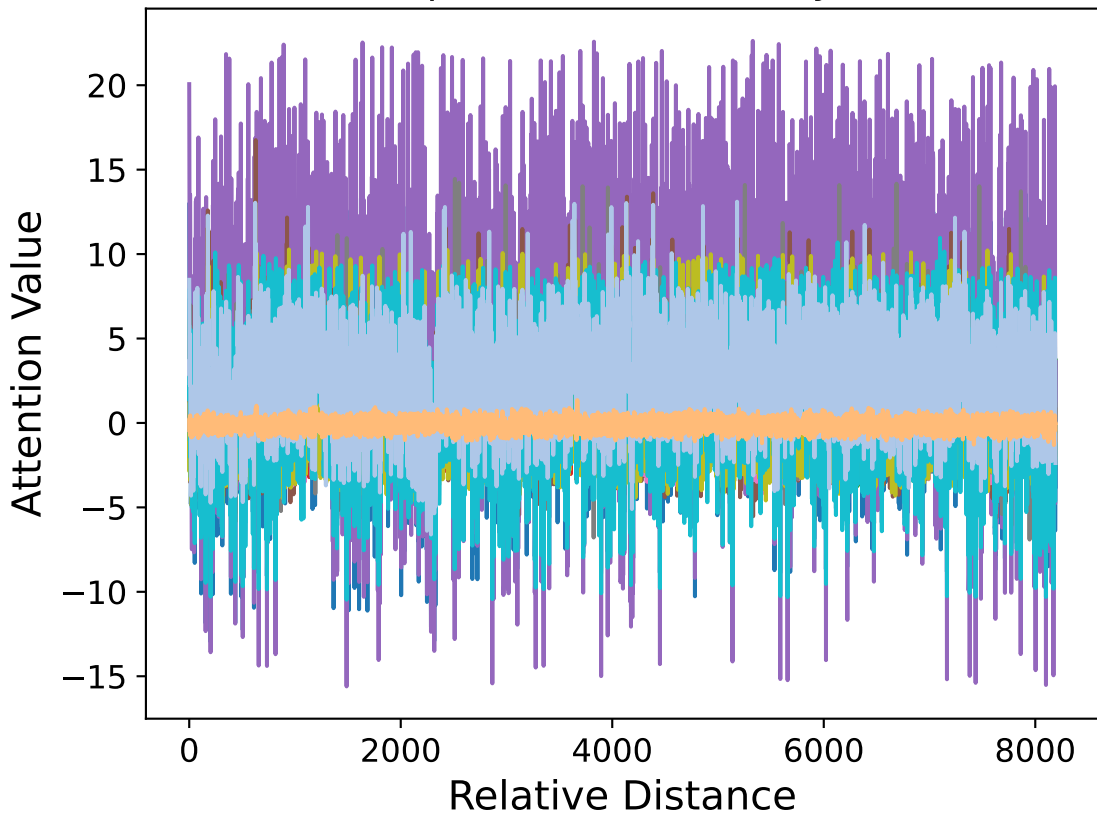

Supplement: supplementary_material [file attachment]

Example 1: Final Attention (Layer 10)

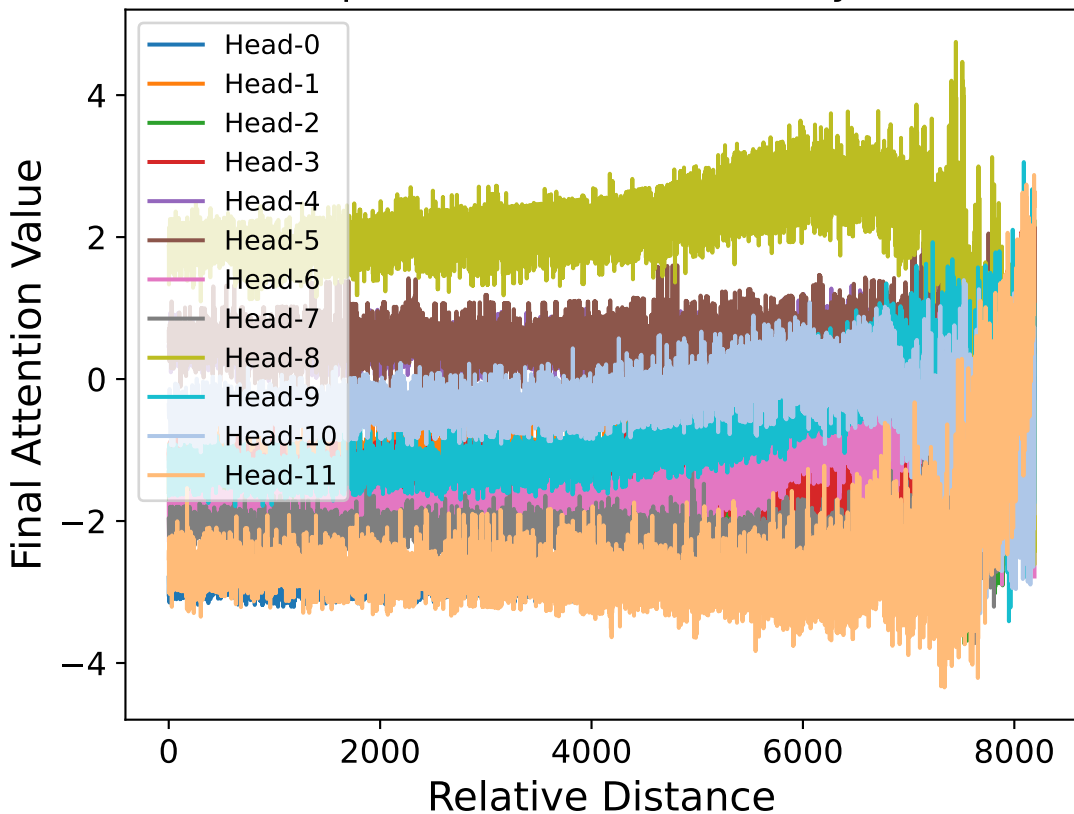

Supplement: supplementary_material [file attachment]

Example 1: Final Attention (Layer 3)

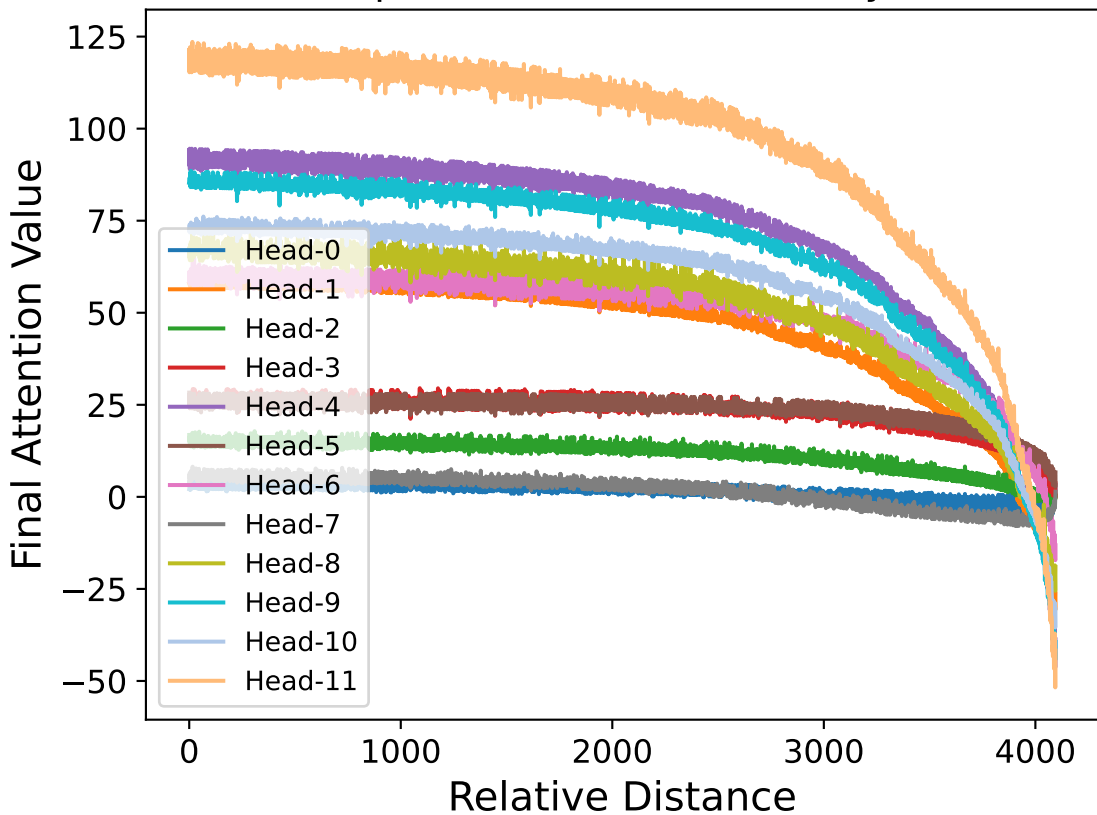

Supplement: supplementary_material [file attachment]

Example 1: Final Attention (Layer 7)

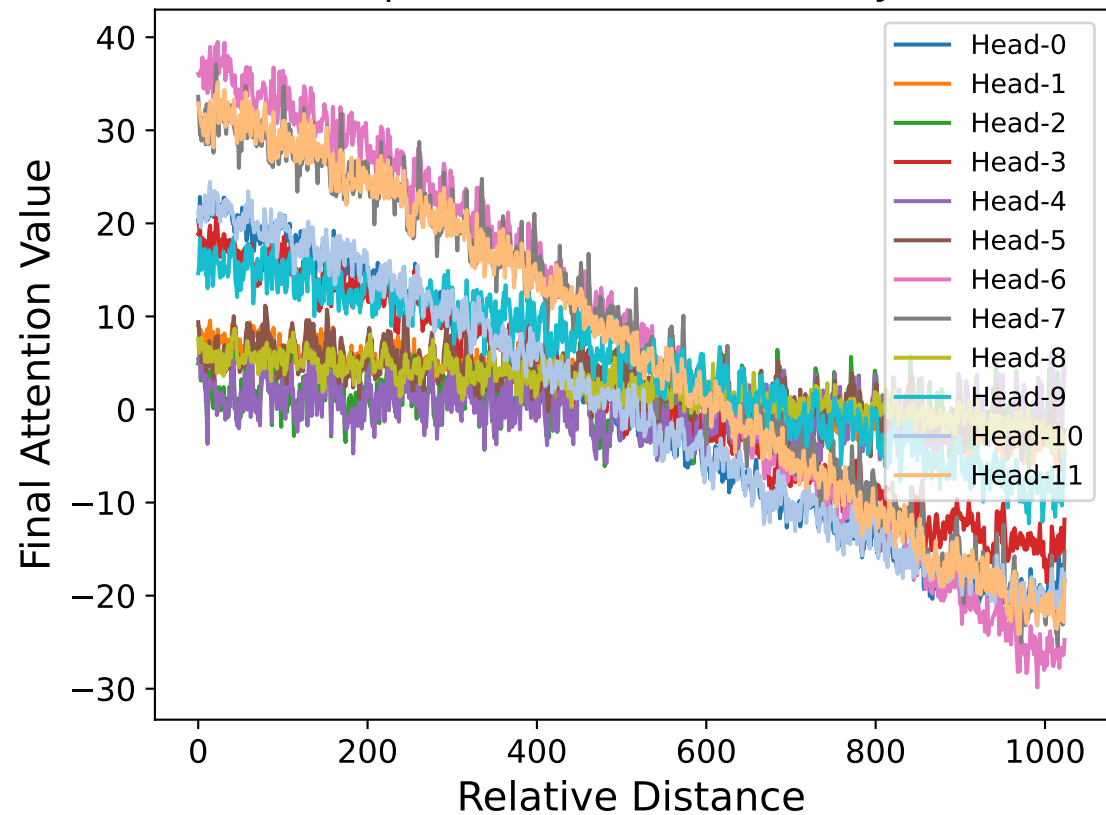

Supplement: supplementary_material [file attachment]

Example 1: DAPE Bias (Layer 6)

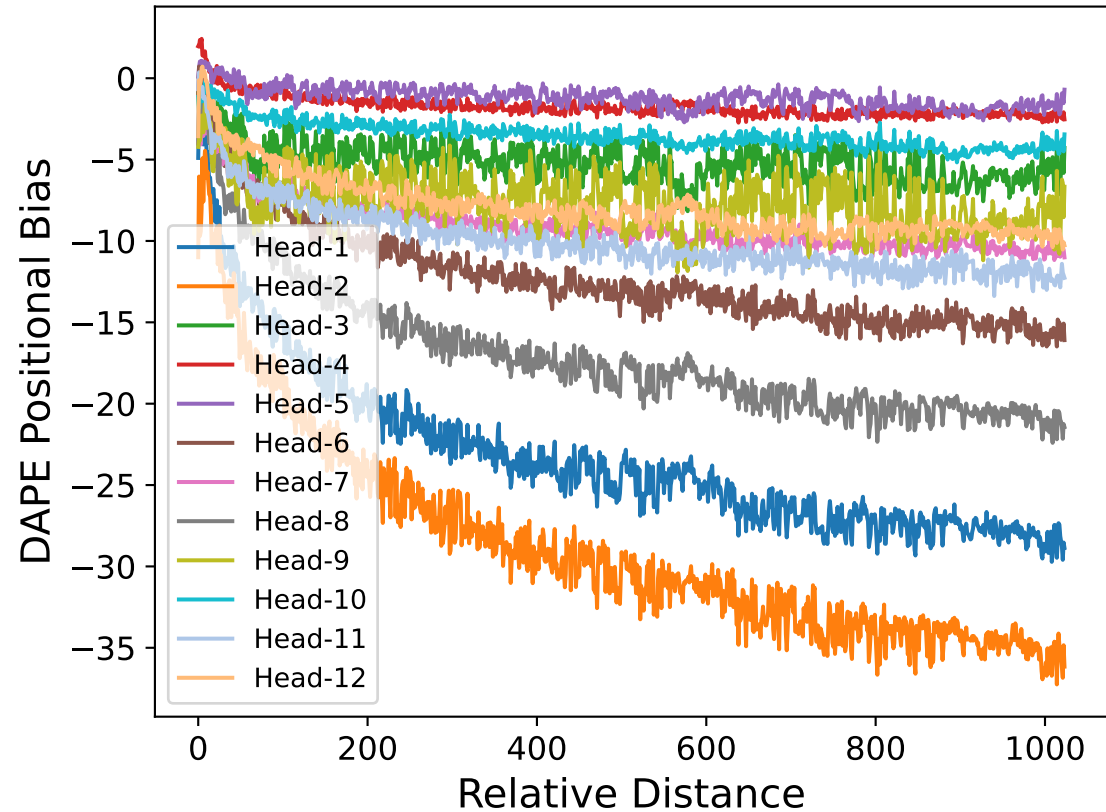

Supplement: supplementary_material [file attachment]

Example 1: Final Attention (Layer 2)

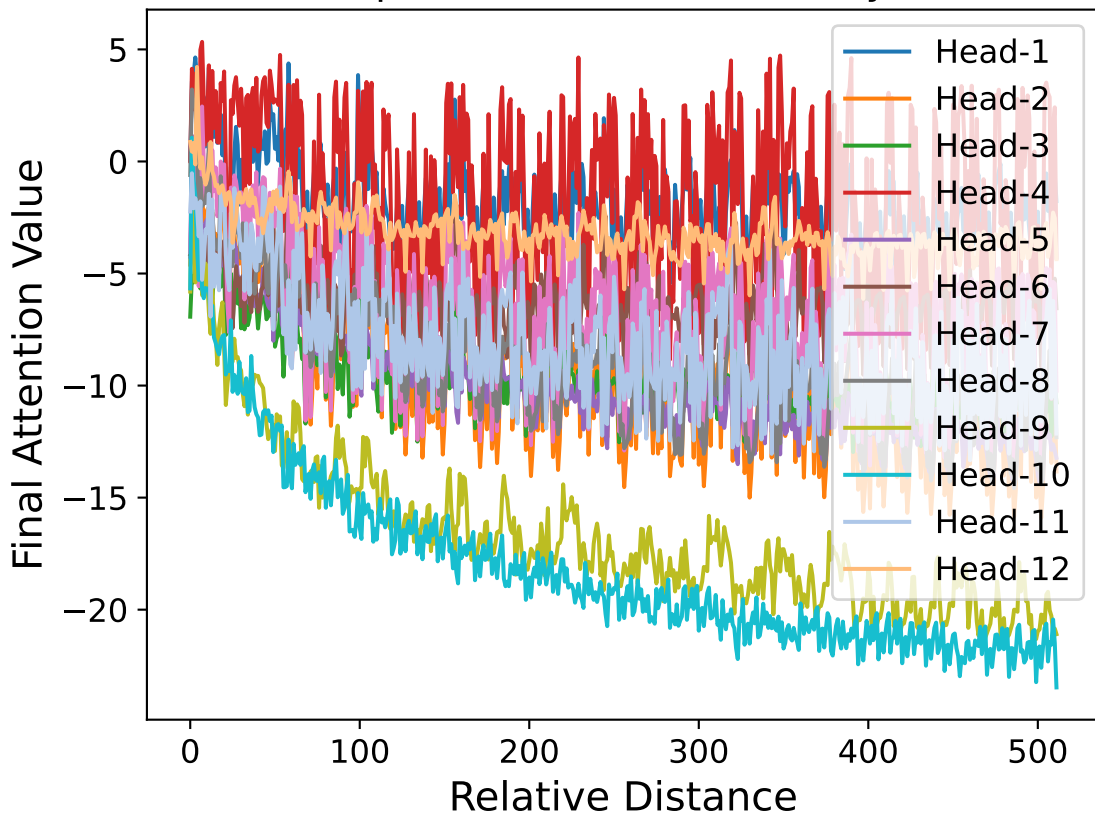

Supplement: supplementary_material [file attachment]

Example 1: DAPE Bias (Layer 6)

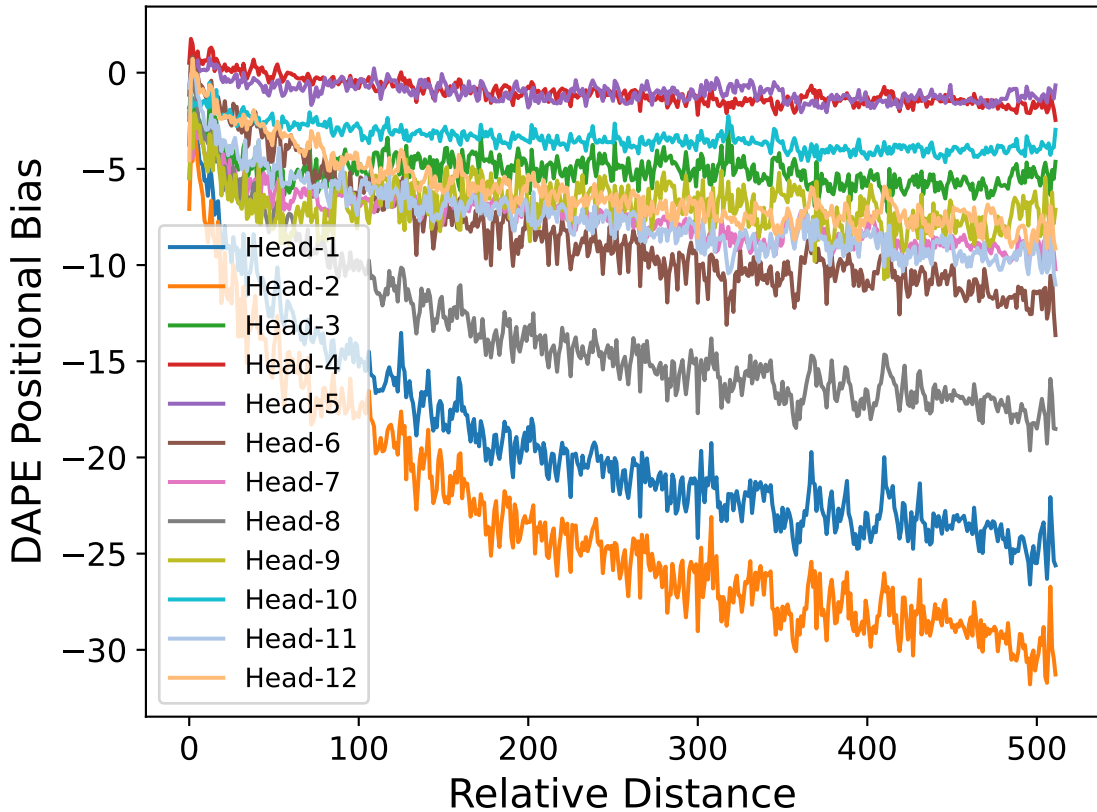

Supplement: supplementary_material [file attachment]

Example 1: Attention (Layer 9)

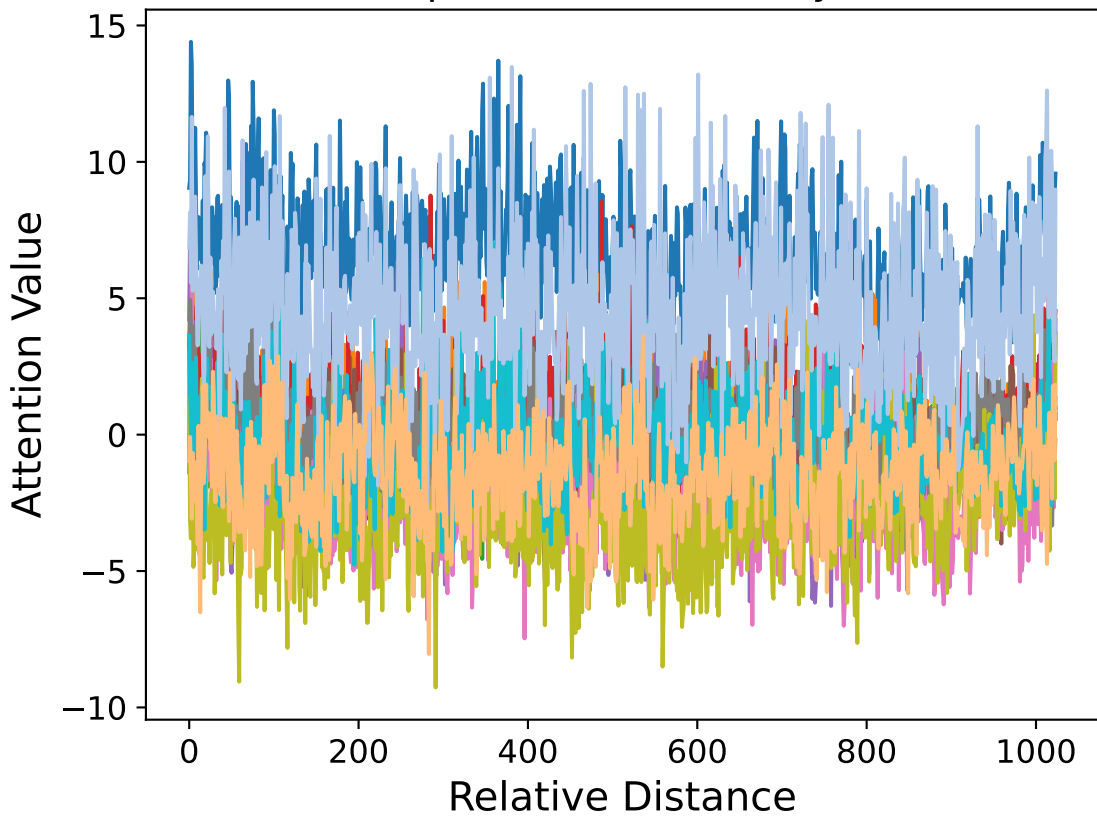

Supplement: supplementary_material [file attachment]

Example 1: Final Attention (Layer 10)

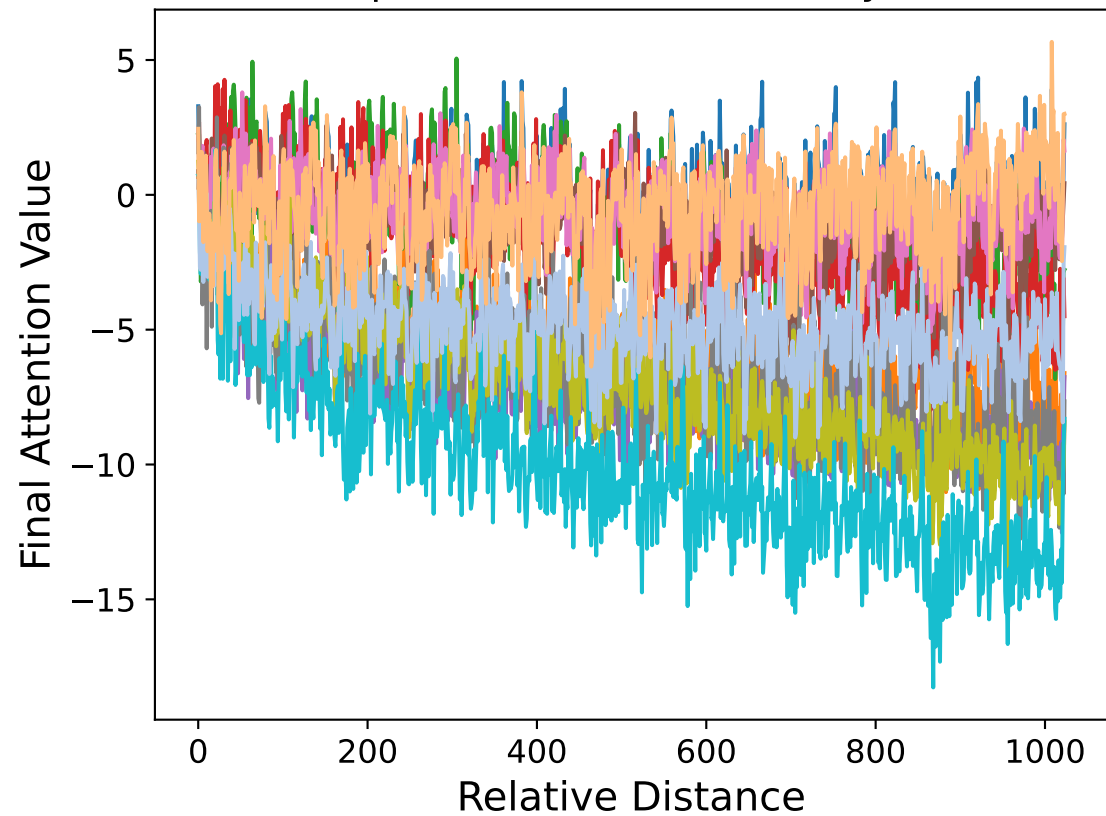

Supplement: supplementary_material [file attachment]

Example 1: Attention (Layer 5)

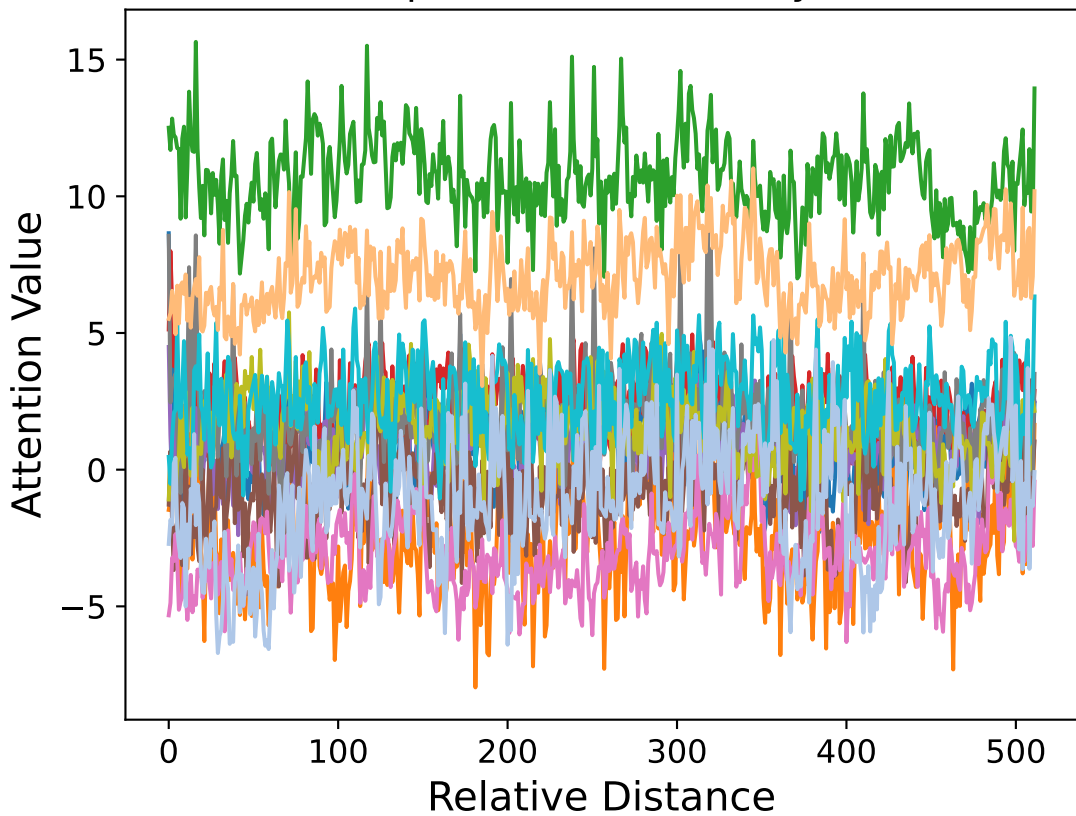

Supplement: supplementary_material [file attachment]

Example 1: DAPE Bias (Layer 5)

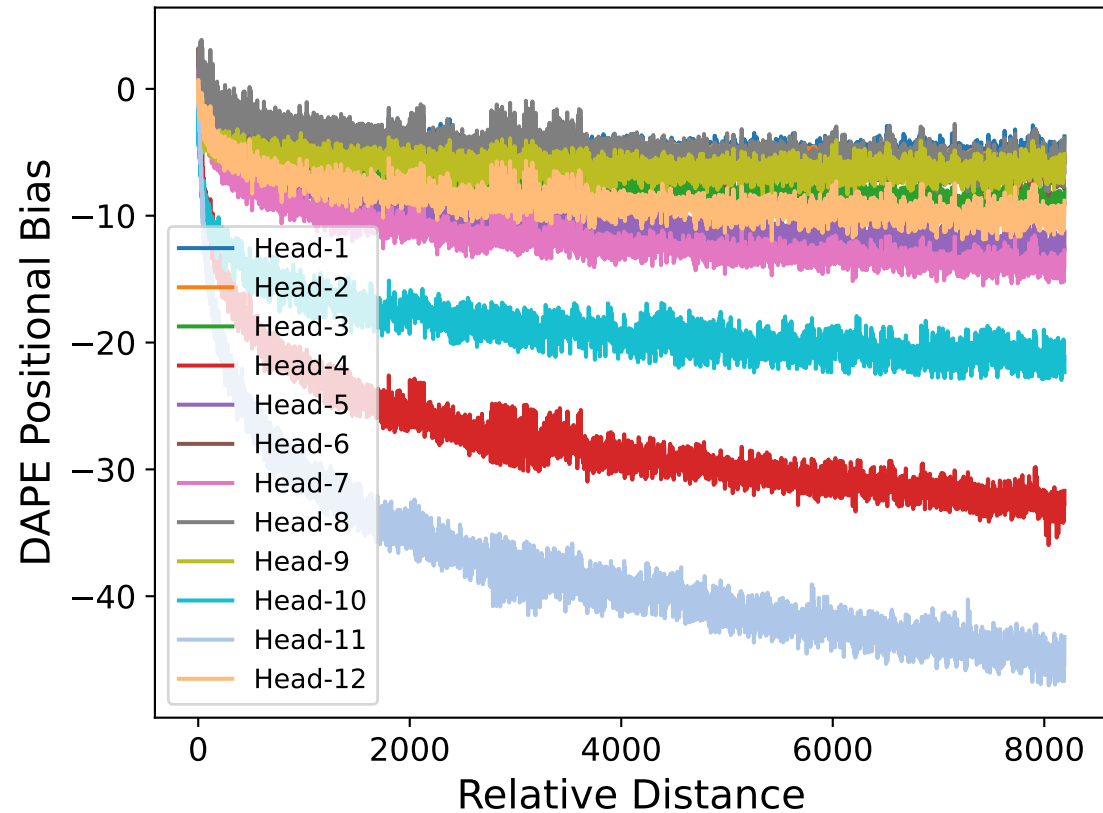

Supplement: supplementary_material [file attachment]

Example 1: Attention (Layer 4)

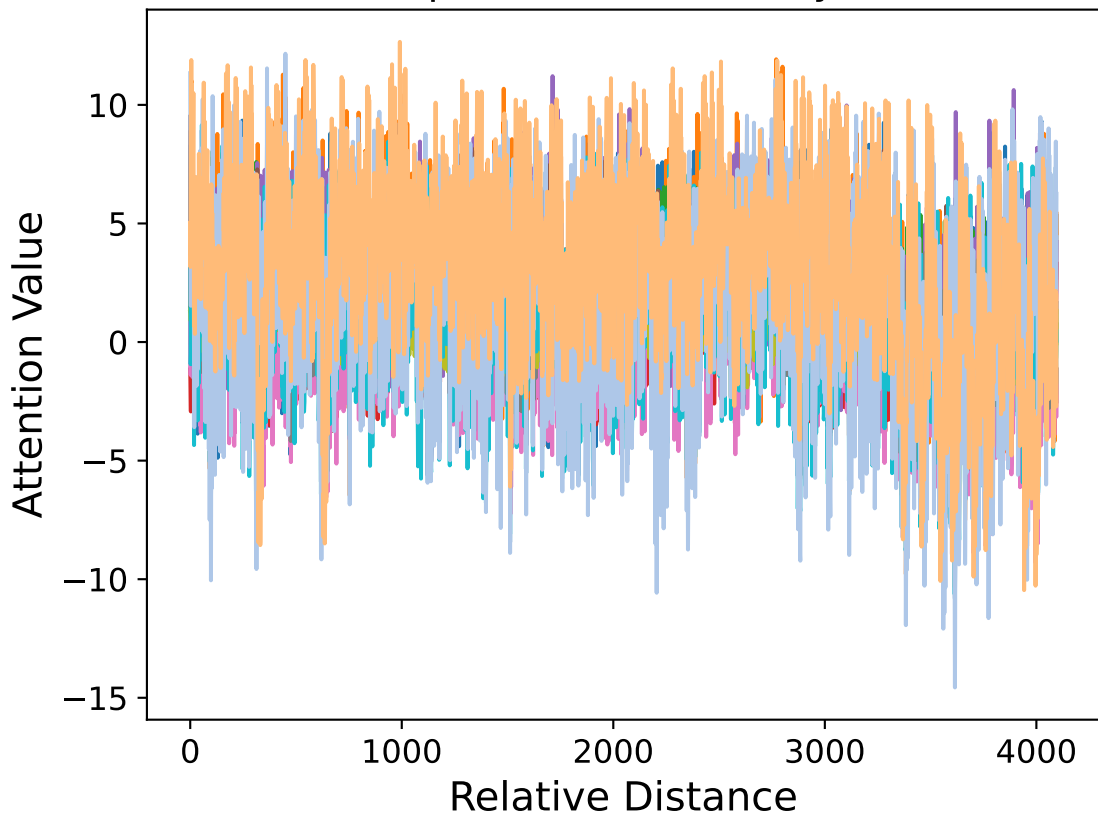

Supplement: supplementary_material [file attachment]

Example 1: Attention (Layer 6)

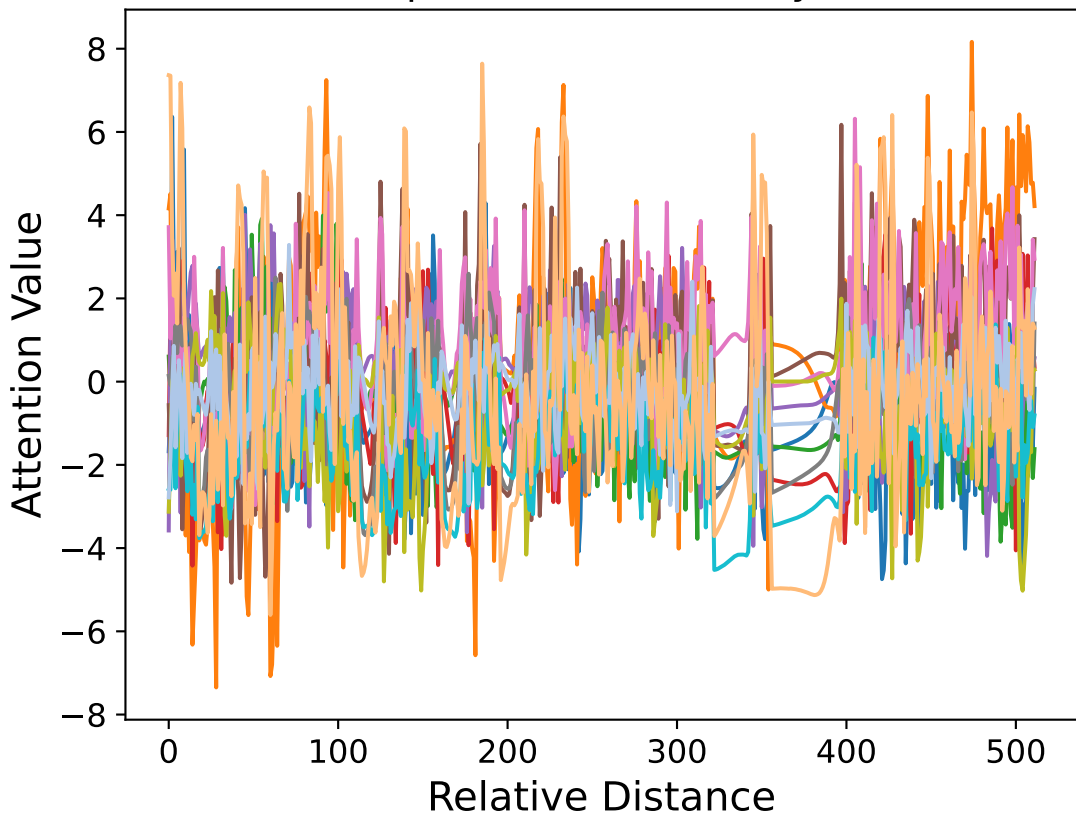

Supplement: supplementary_material [file attachment]

Example 1: Attention (Layer 6)

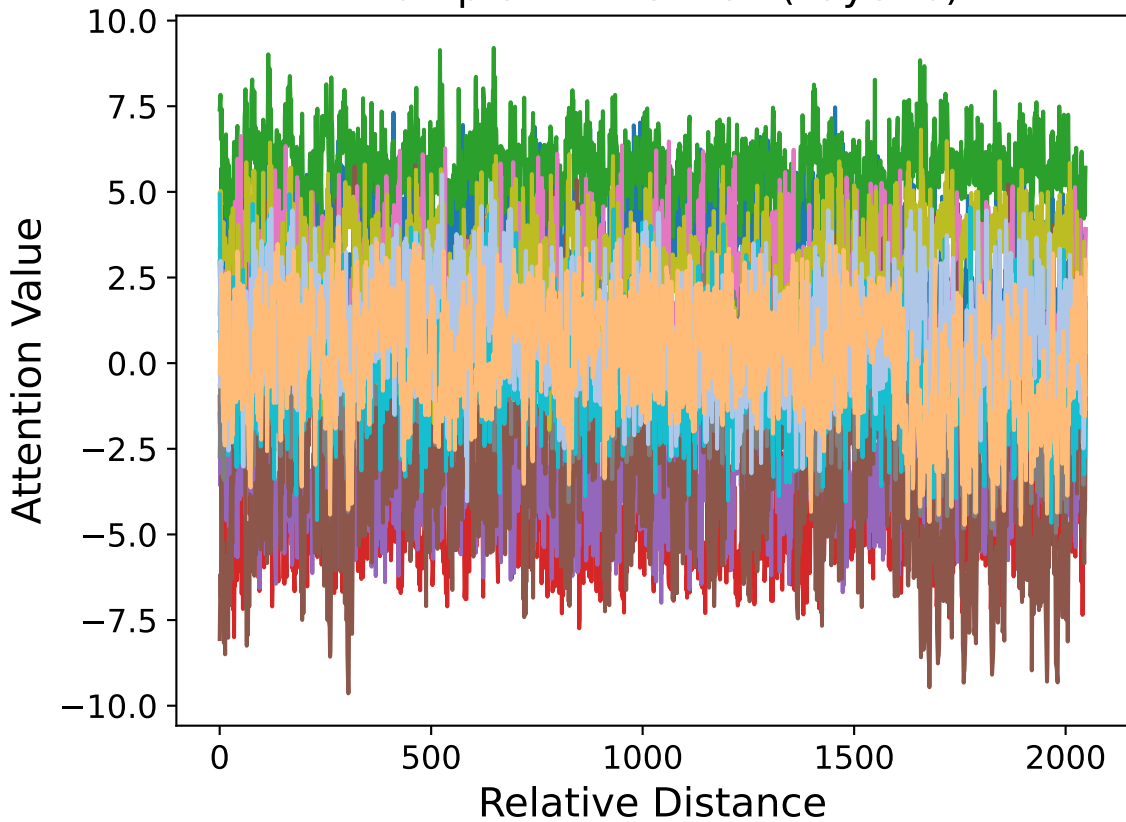

Supplement: supplementary_material [file attachment]

Example 1: Final Attention (Layer 12)

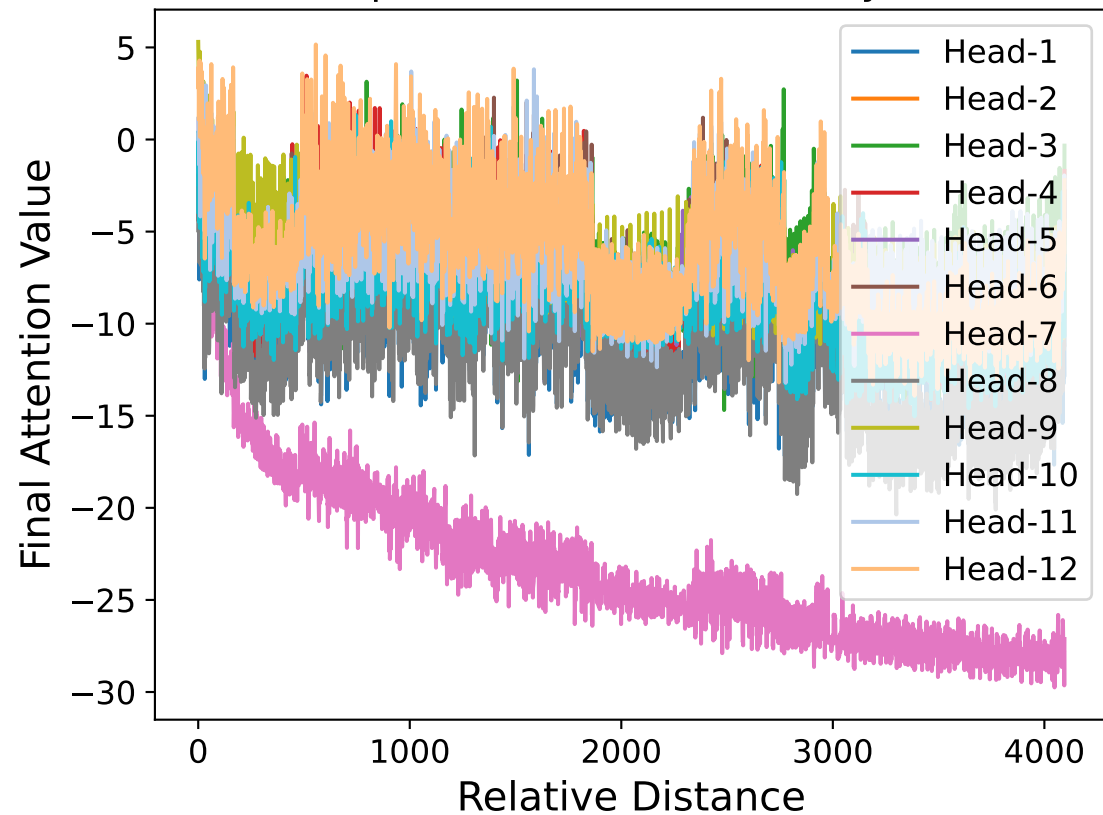

Supplement: supplementary_material [file attachment]

### Example 1: Final Attention (Layer 4)

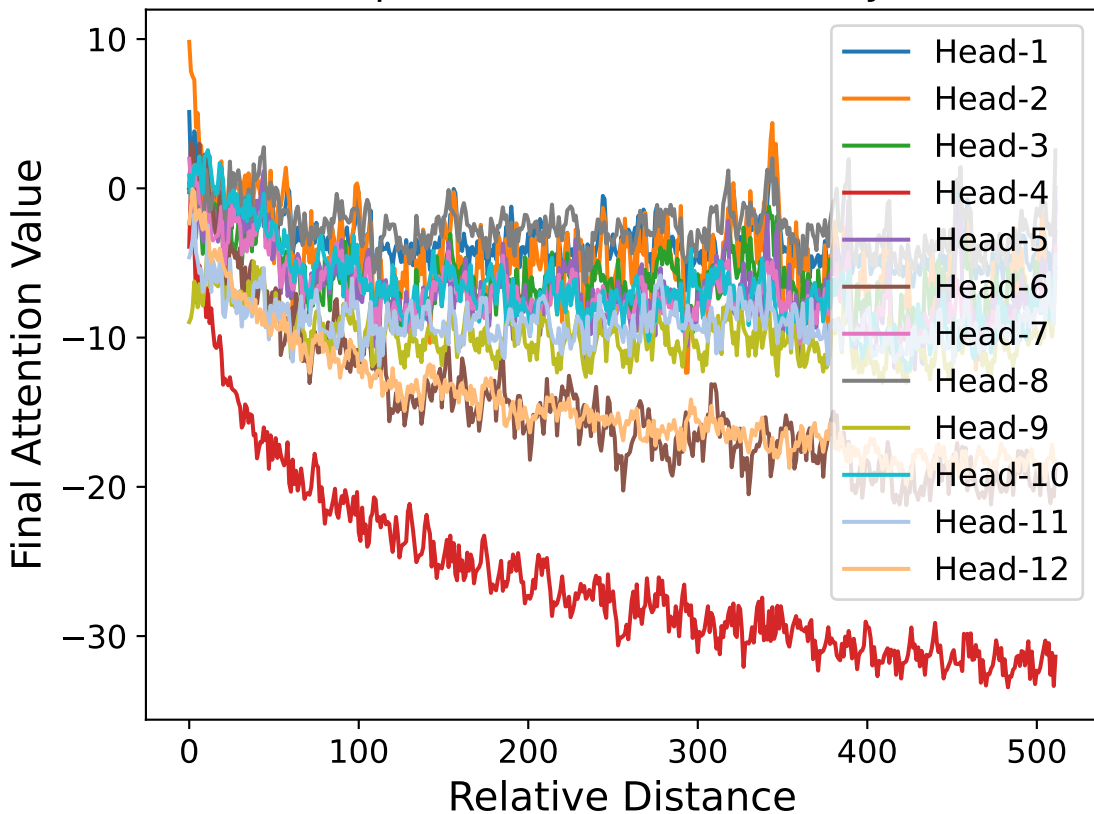

Supplement: supplementary_material [file attachment]

Example 1: Final Attention (Layer 6)

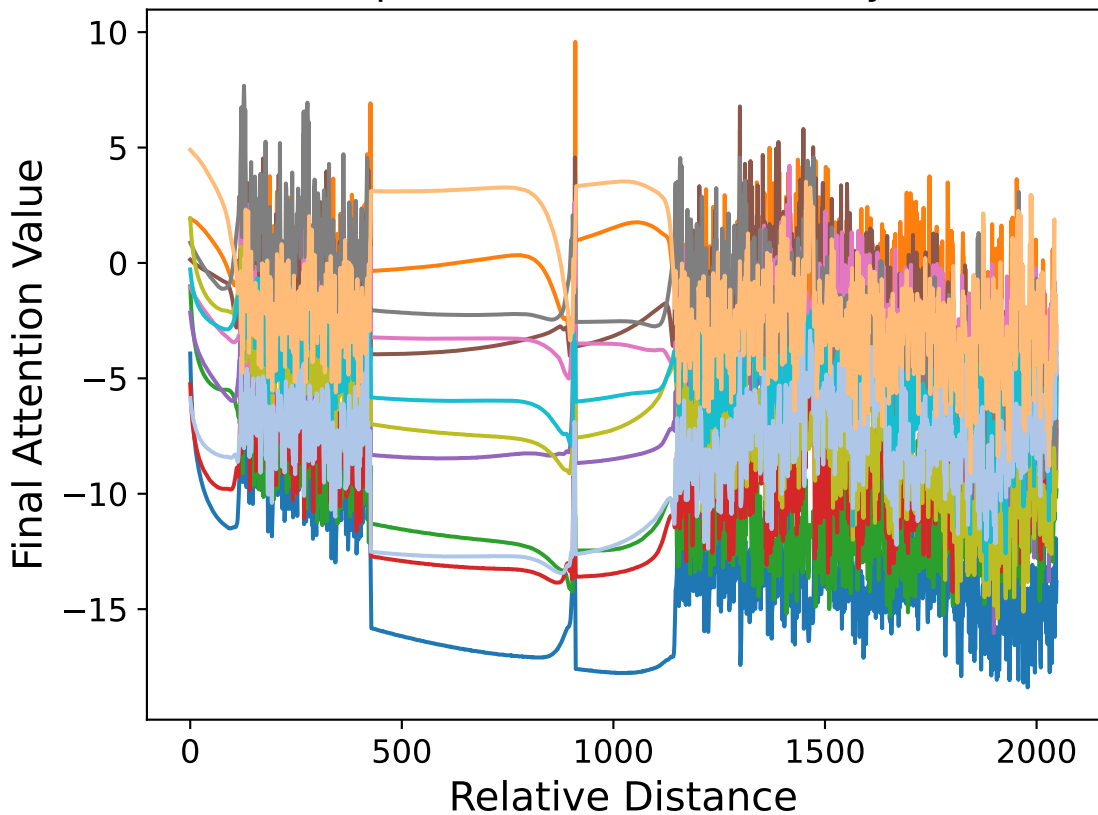

Supplement: supplementary_material [file attachment]

Example 1: Attention (Layer 11)

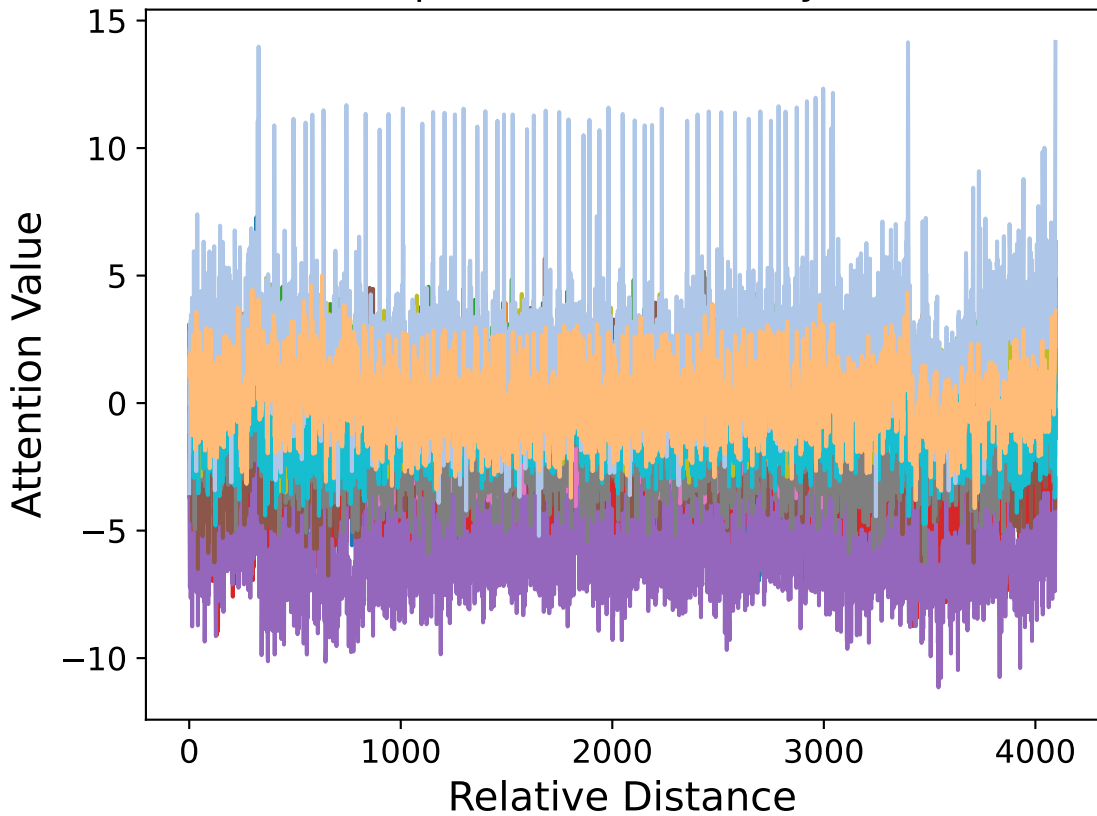

Supplement: supplementary_material [file attachment]

Example 1: Attention (Layer 9)

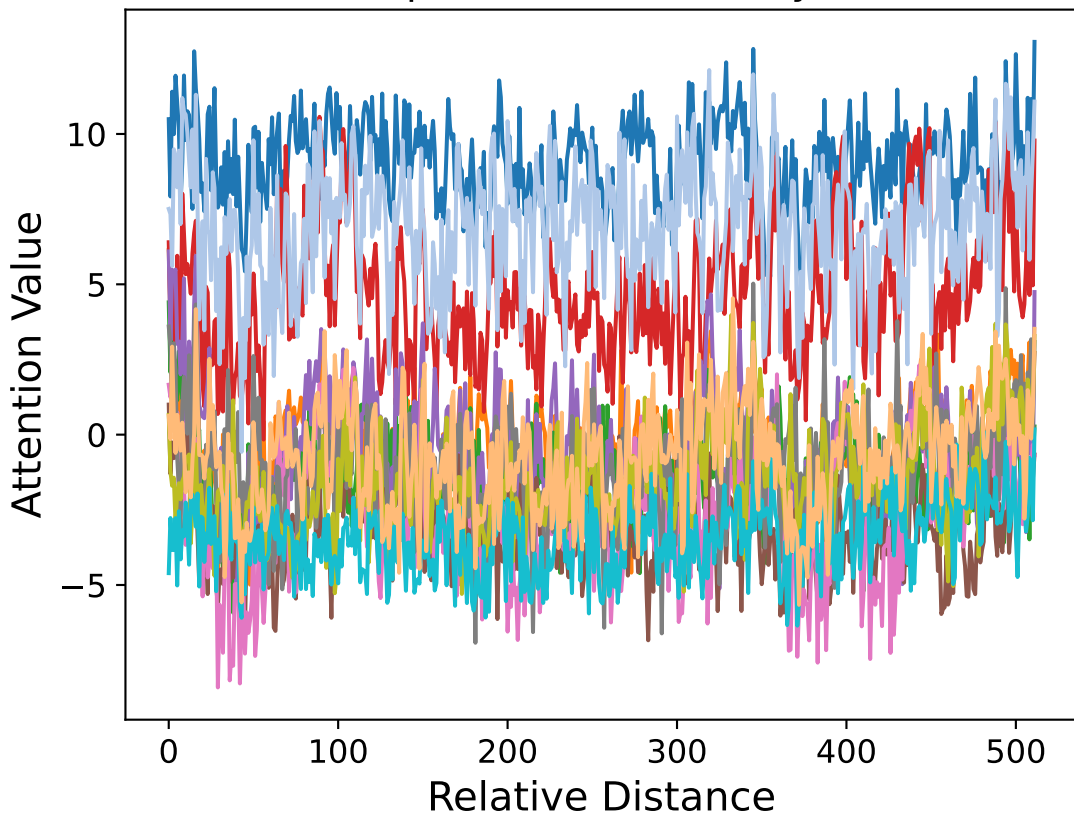

Supplement: supplementary_material [file attachment]

Example 1: DAPE Bias (Layer 2)

DAPE Positional Bias

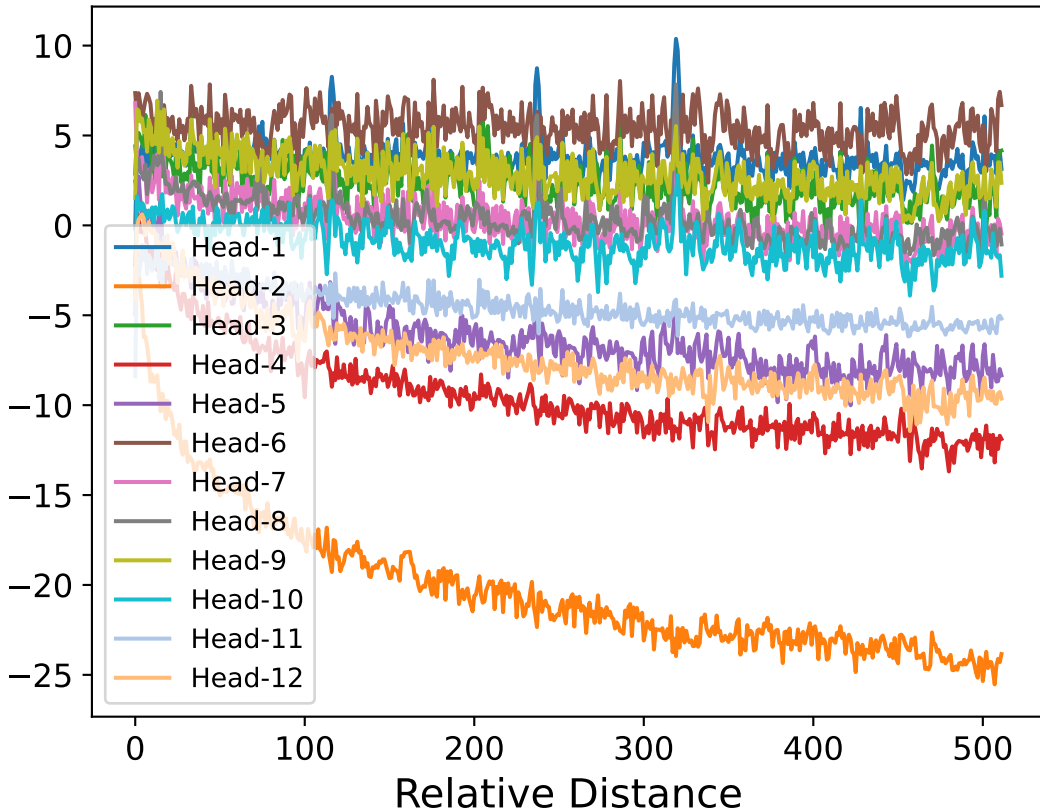

Supplement: supplementary_material [file attachment]

Example 1: Attention (Layer 10)

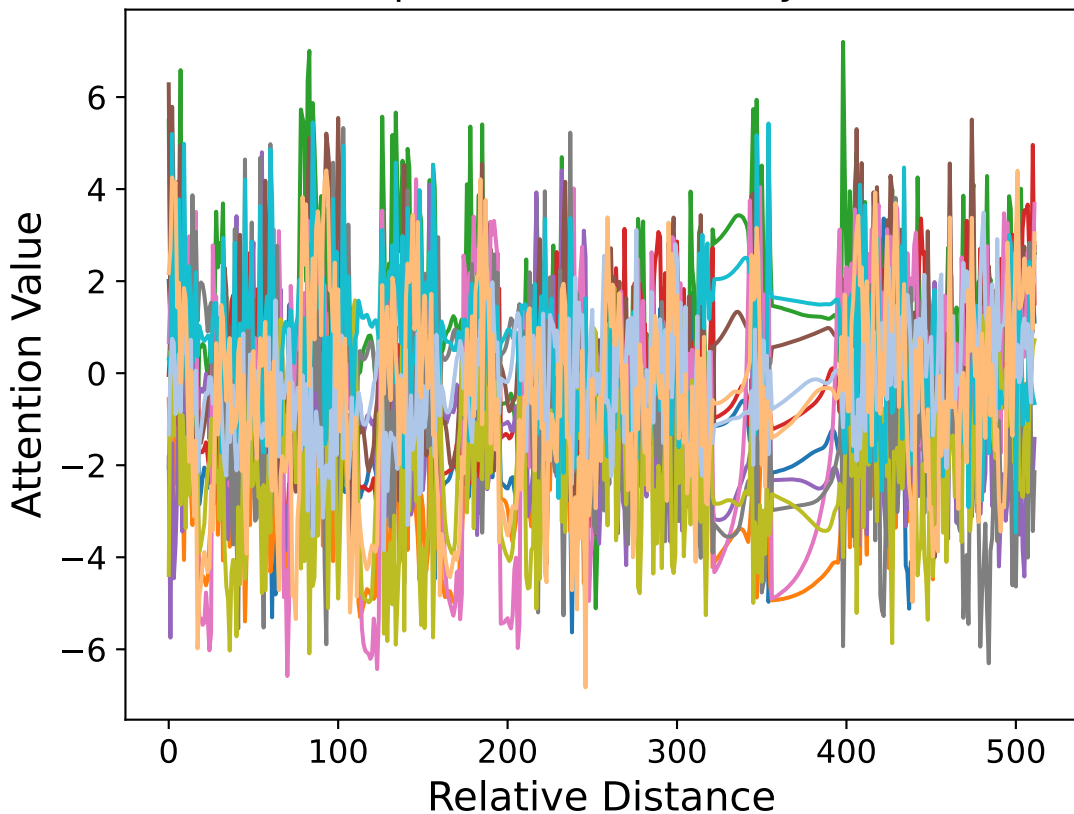

Supplement: supplementary_material [file attachment]

Example 1: Attention (Layer 8)

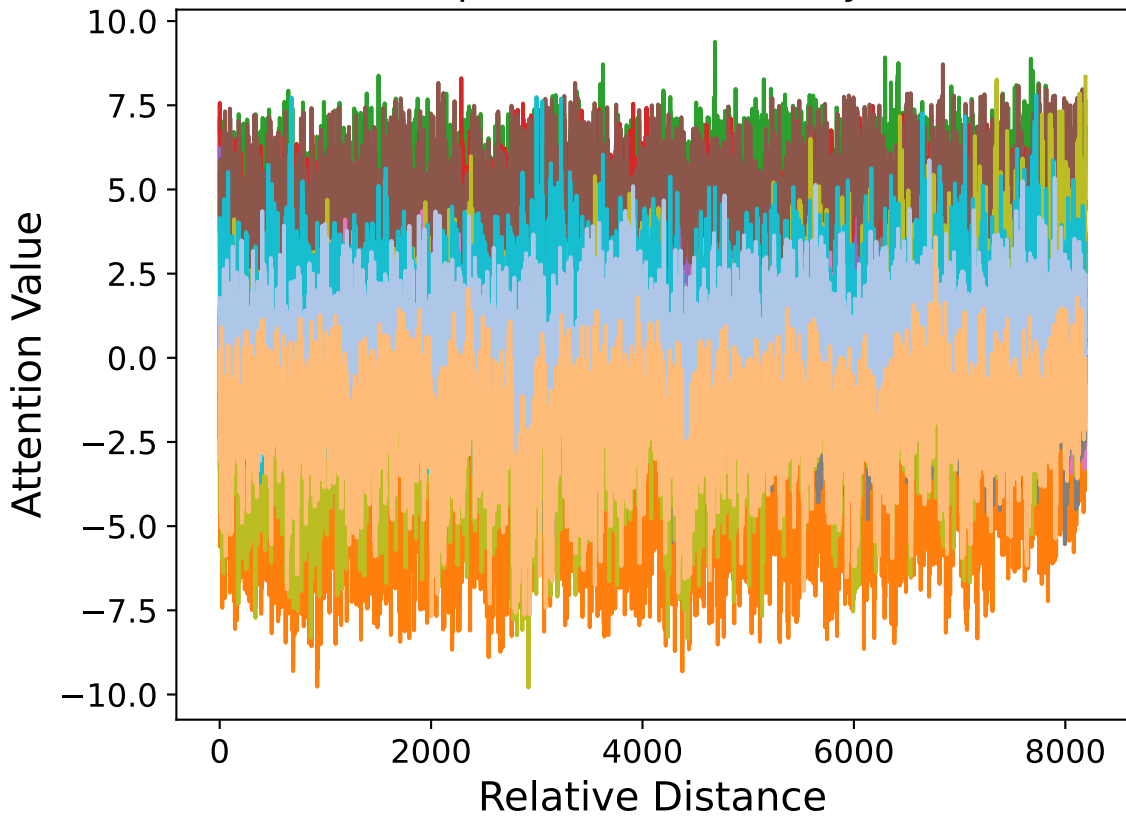

Supplement: supplementary_material [file attachment]

Example 1: Kerple Bias (Layer 1)

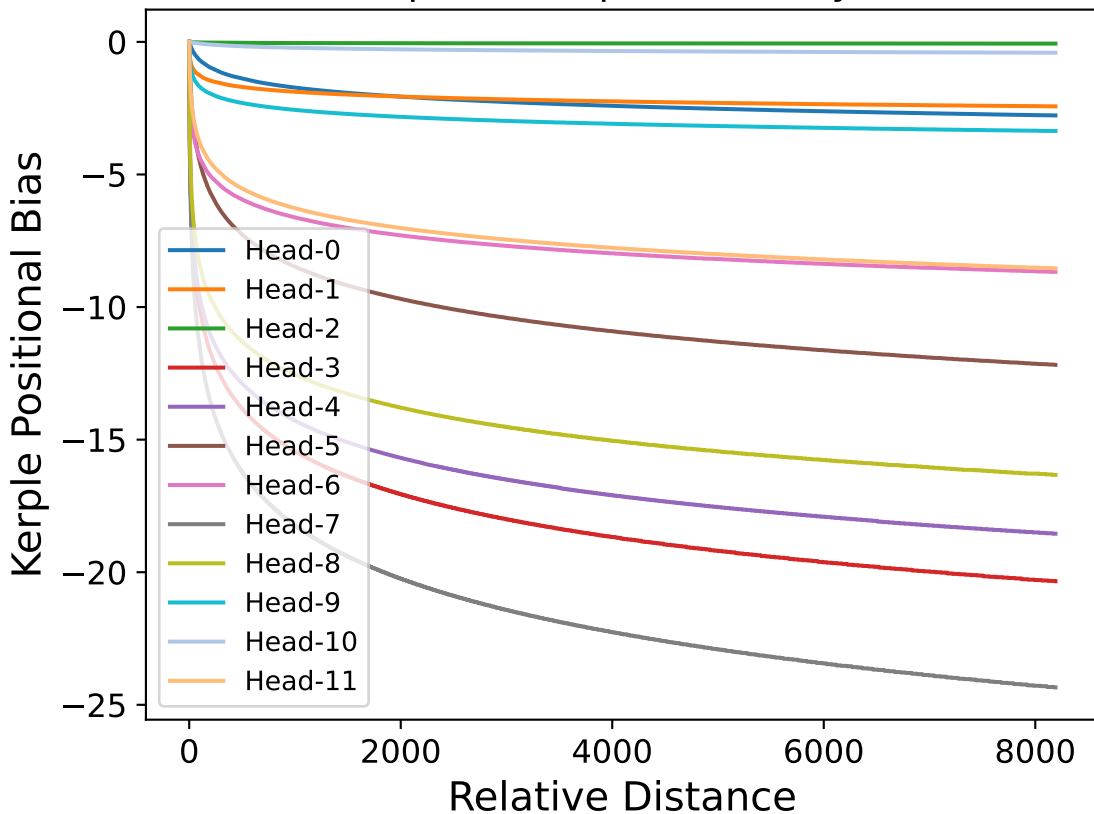

Supplement: supplementary_material [file attachment]

Example 1: Kerple Bias (Layer 1)

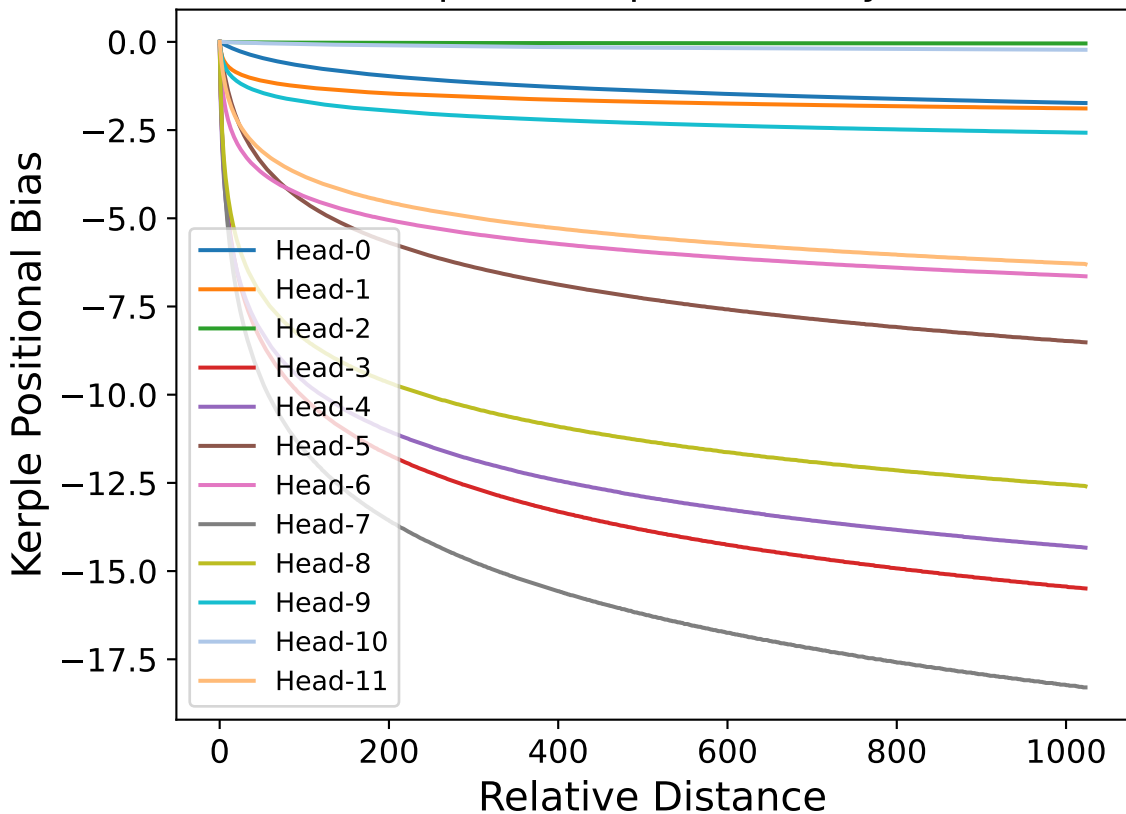

Supplement: supplementary_material [file attachment]

Example 1: Final Attention (Layer 6)

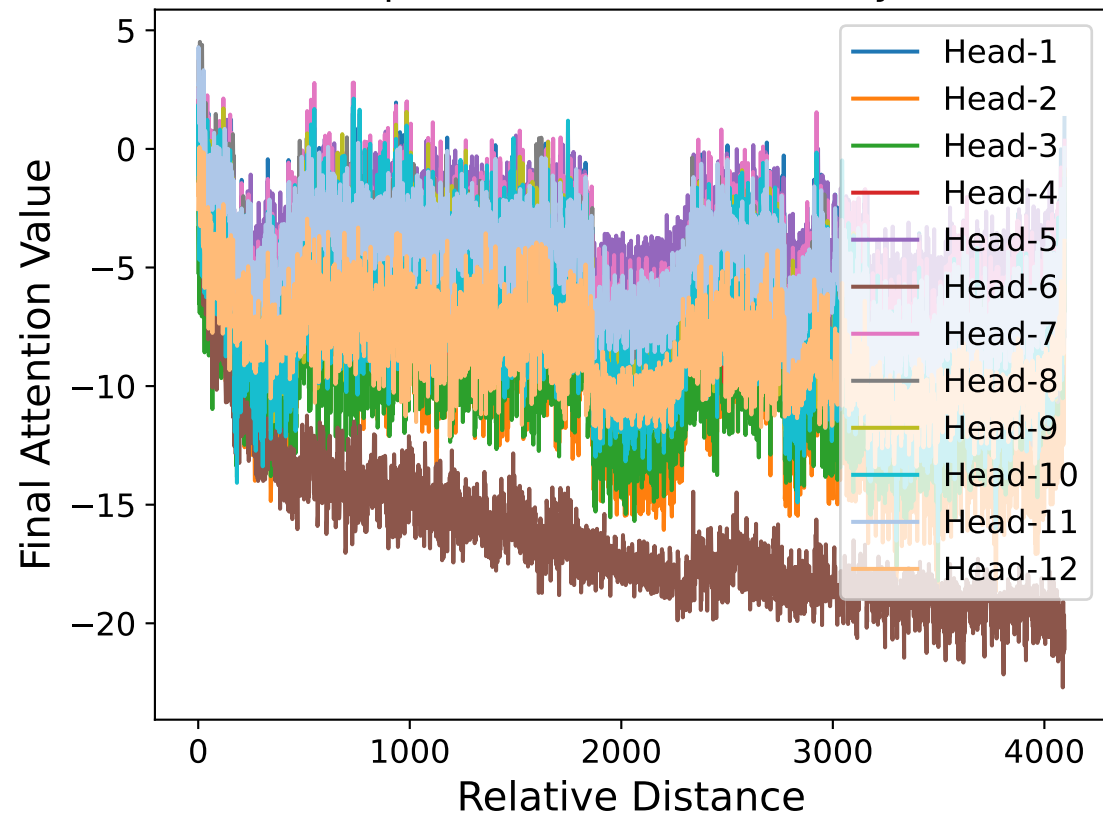

Supplement: supplementary_material [file attachment]

Example 1: Final Attention (Layer 2)

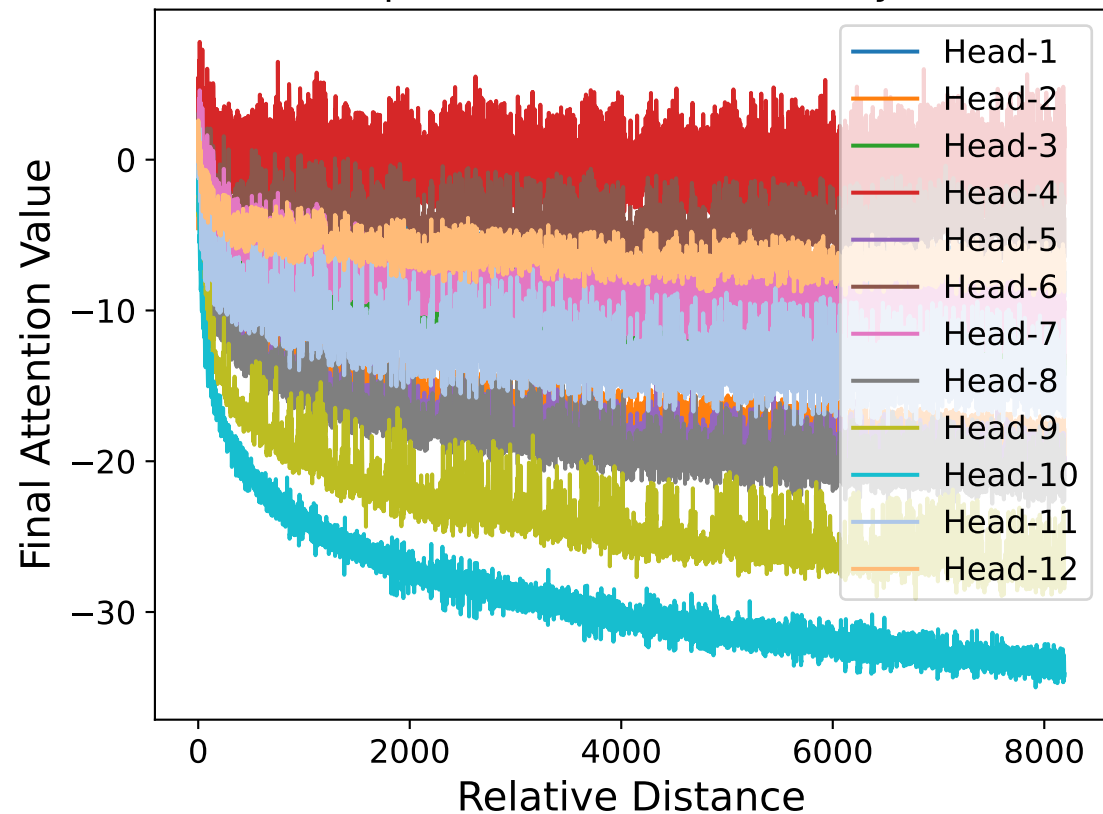

Supplement: supplementary_material [file attachment]

Example 1: Kerple Bias (Layer 5)

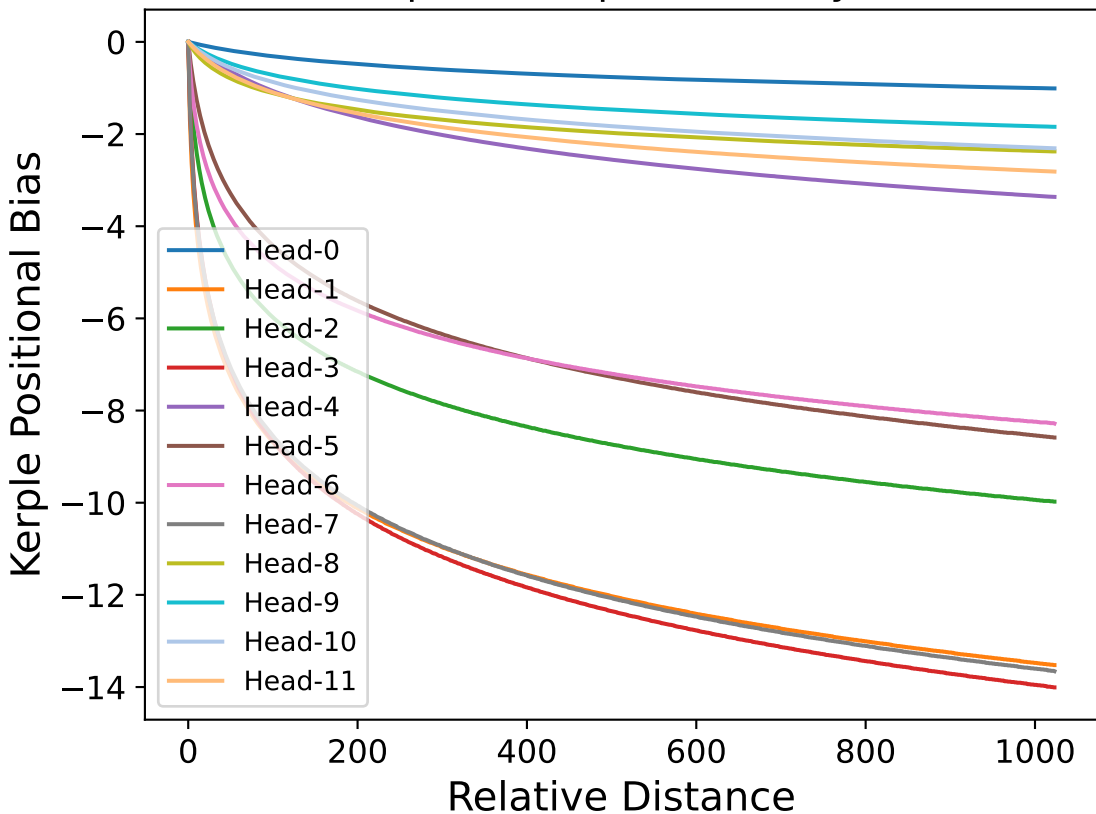

Supplement: supplementary_material [file attachment]

Example 1: DAPE Bias (Layer 7)

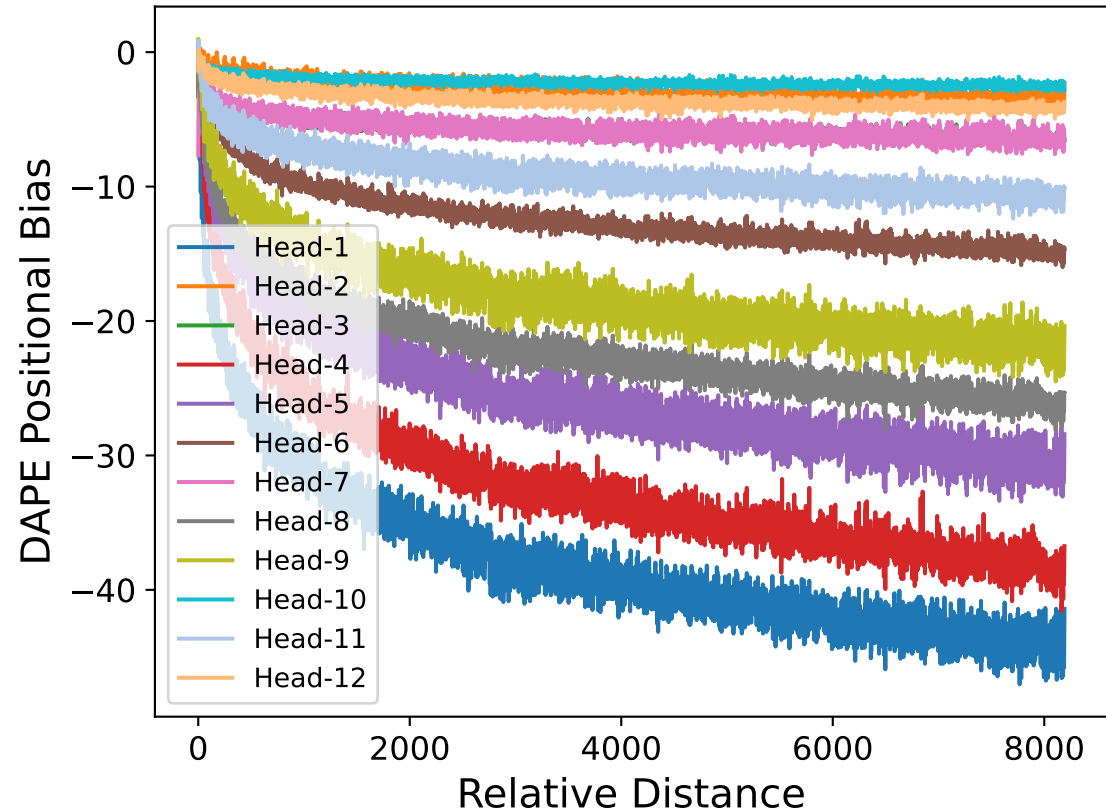

Supplement: supplementary_material [file attachment]

Example 1: DAPE Bias (Layer 1)

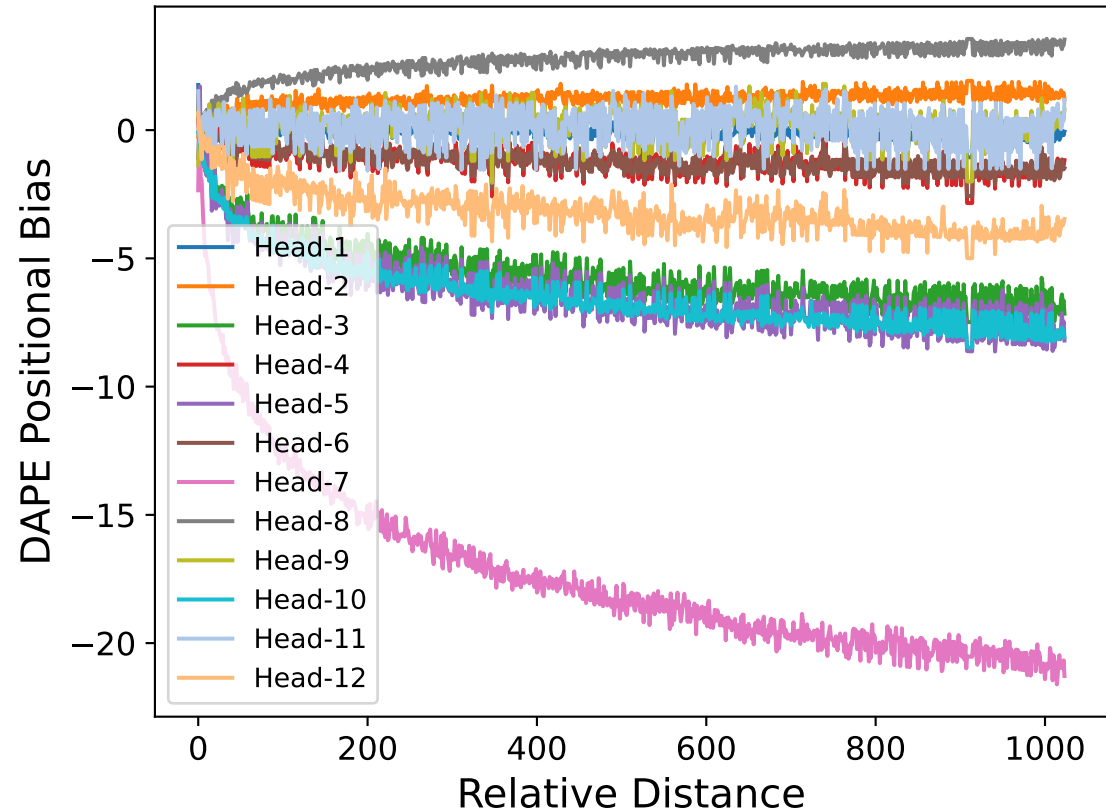

Supplement: supplementary_material [file attachment]

Example 1: Final Attention (Layer 5)

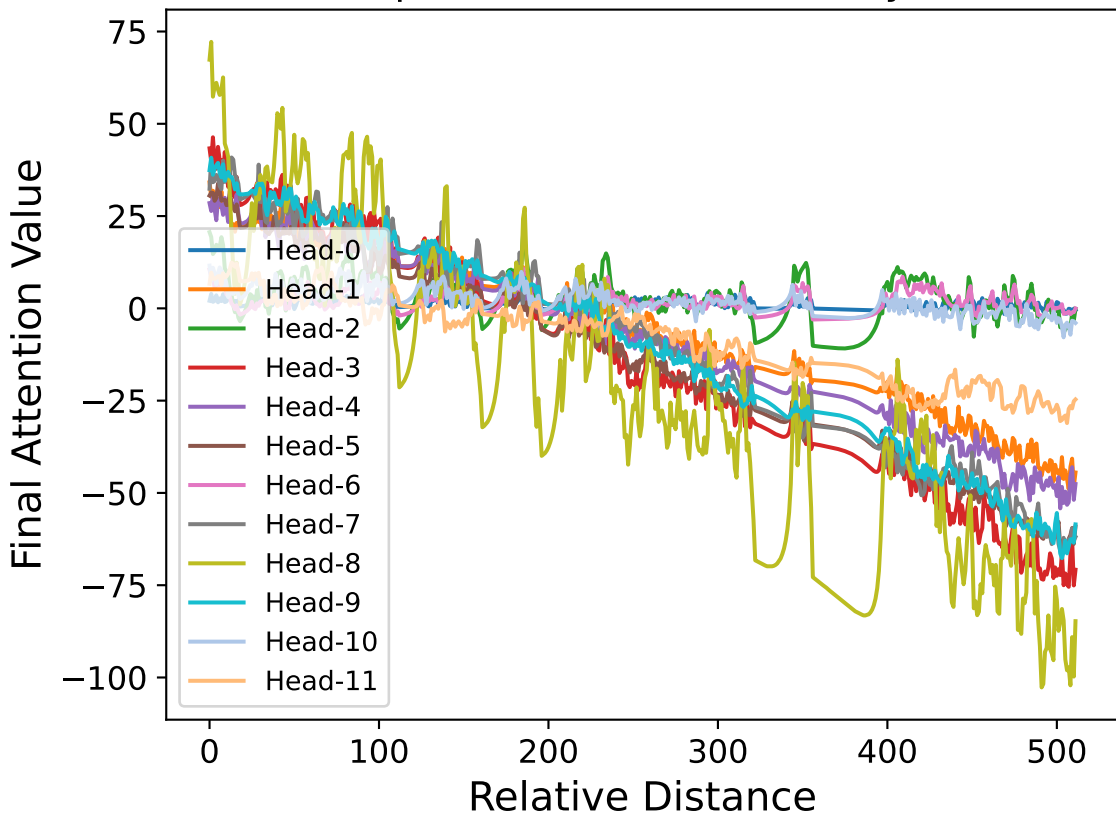

Supplement: supplementary_material [file attachment]

Example 1: Final Attention (Layer 7)

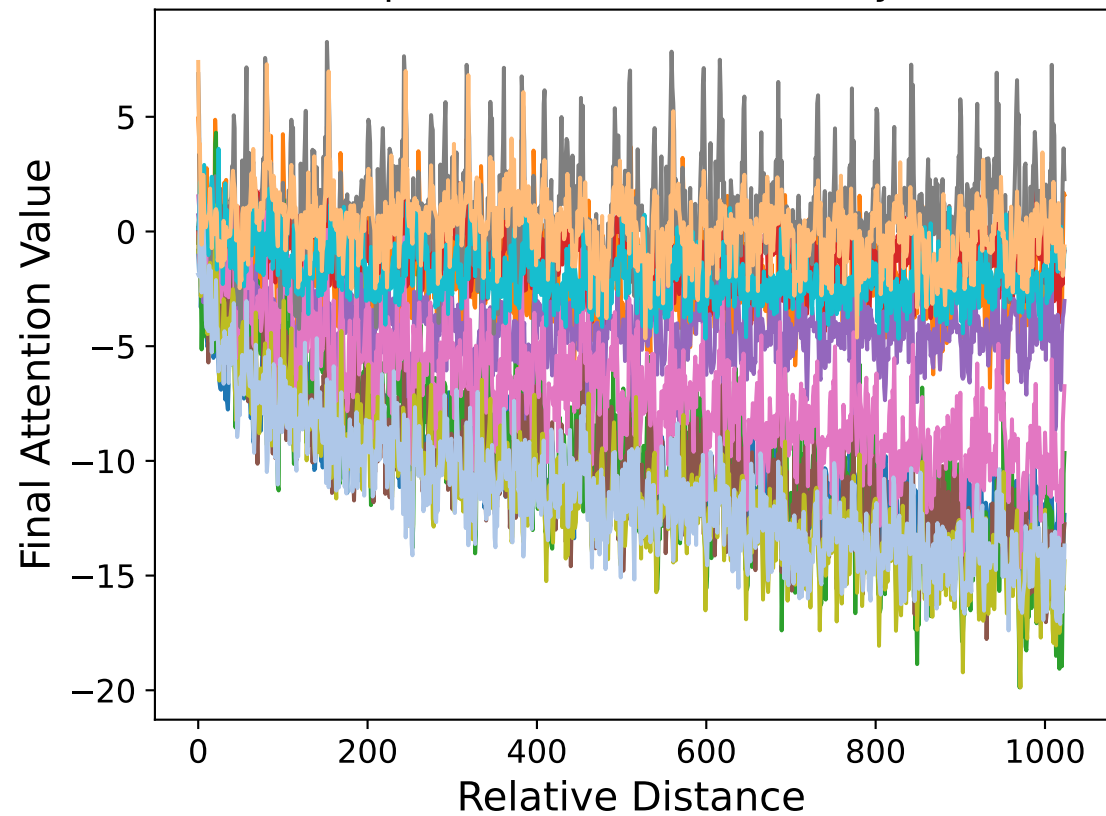

Supplement: supplementary_material [file attachment]

Example 1: Final Attention (Layer 12)

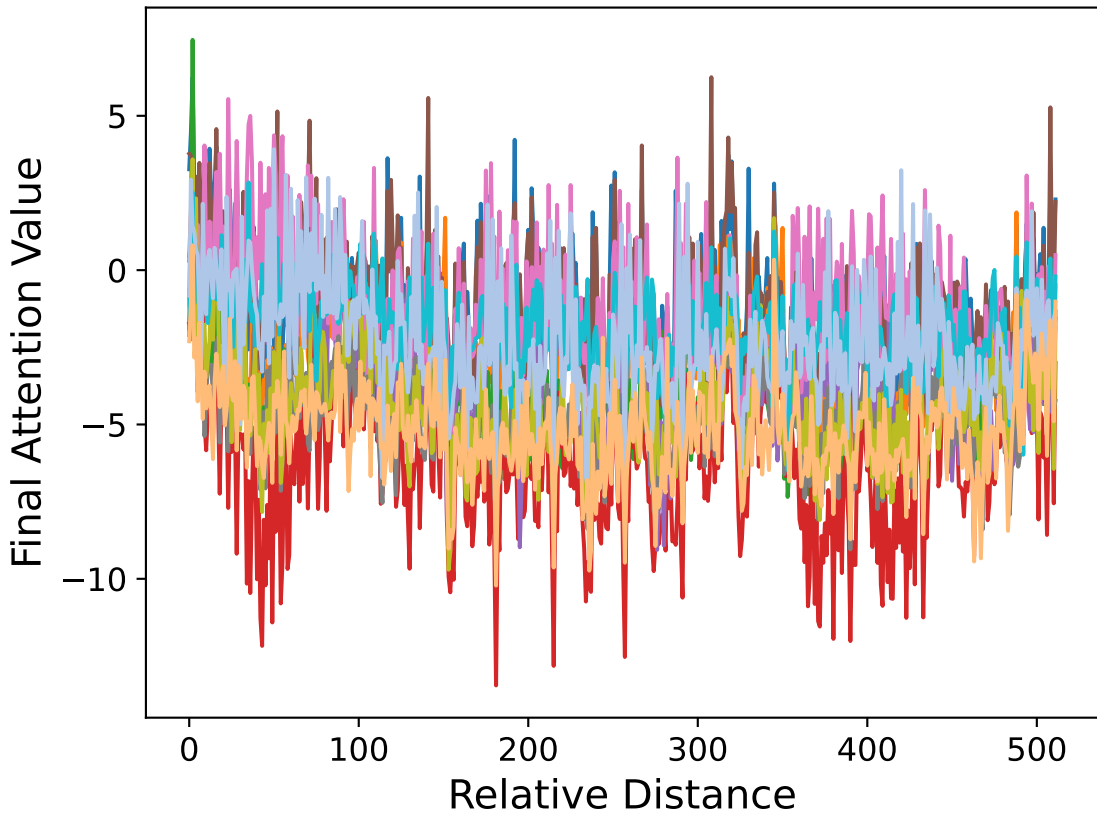

Supplement: supplementary_material [file attachment]

Example 1: Final Attention (Layer 3)

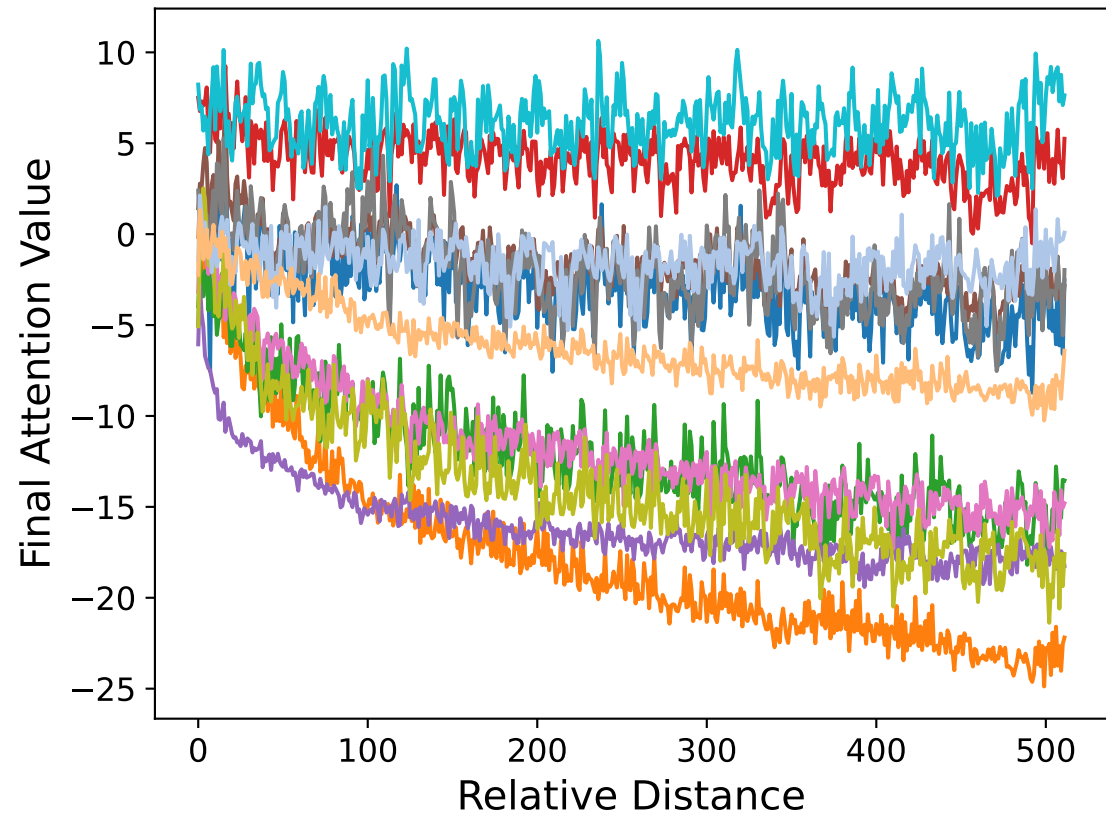

Supplement: supplementary_material [file attachment]

Example 1: Final Attention (Layer 12)

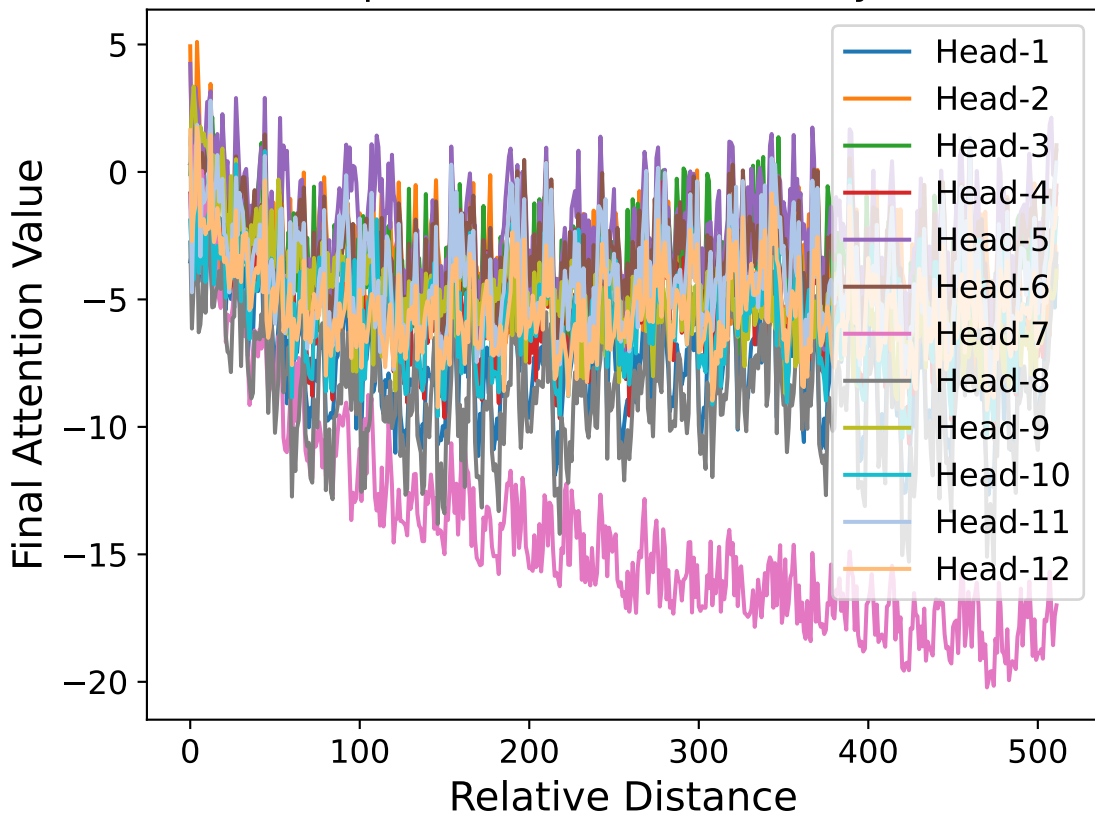

Supplement: supplementary_material [file attachment]

Example 1: DAPE Bias (Layer 2)

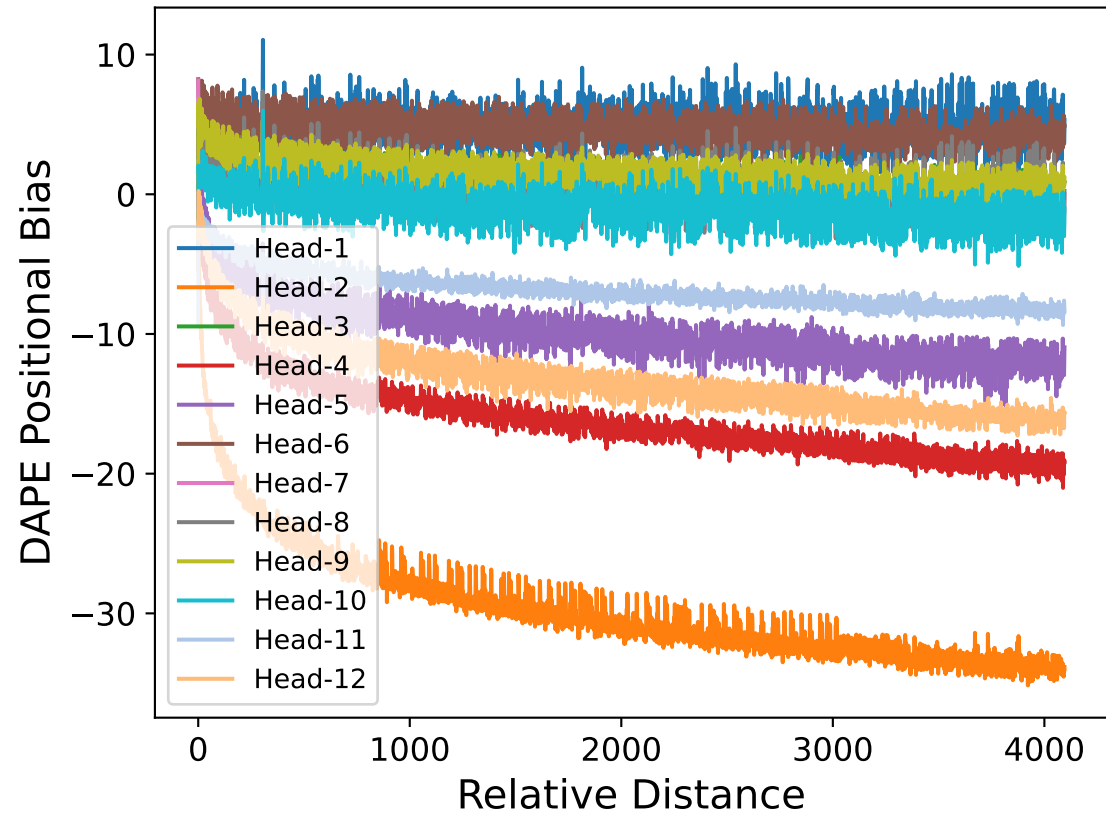

Supplement: supplementary_material [file attachment]

Example 1: DAPE Bias (Layer 1)

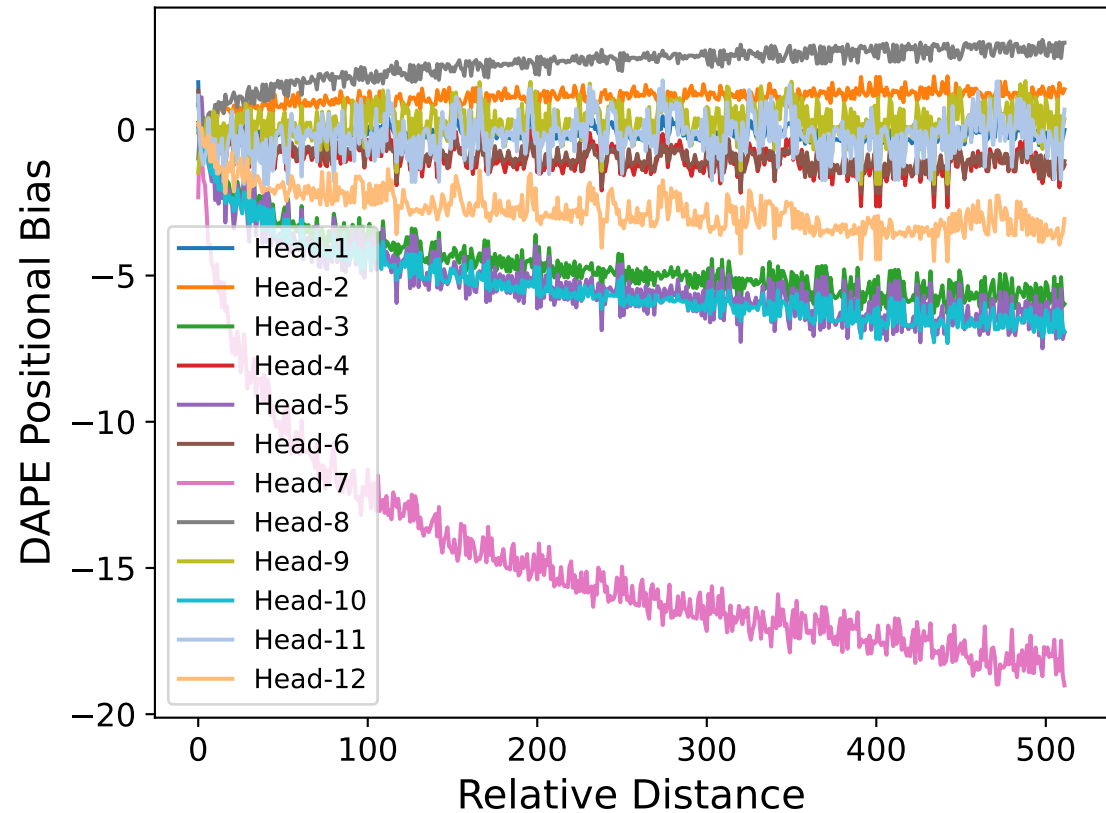

Supplement: supplementary_material [file attachment]

Example 1: DAPE Bias (Layer 8)

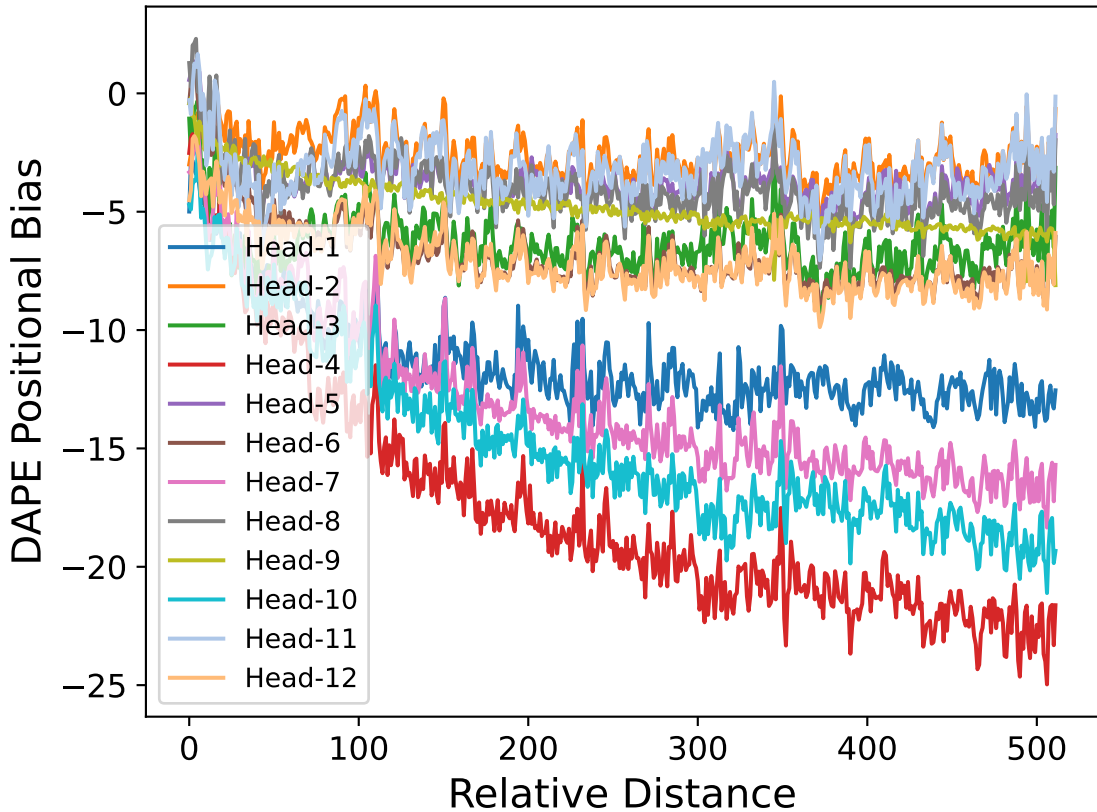

Supplement: supplementary_material [file attachment]

Example 1: Final Attention (Layer 12)

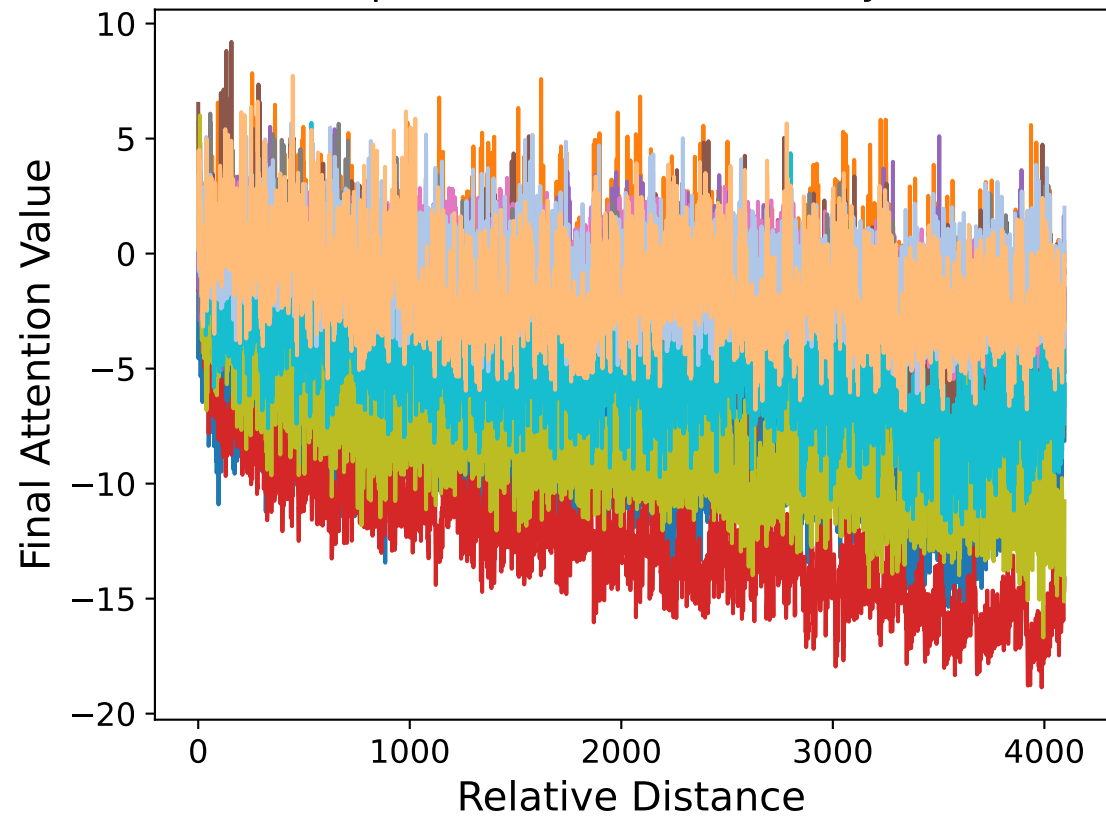

Supplement: supplementary_material [file attachment]

Example 1: Attention (Layer 8)

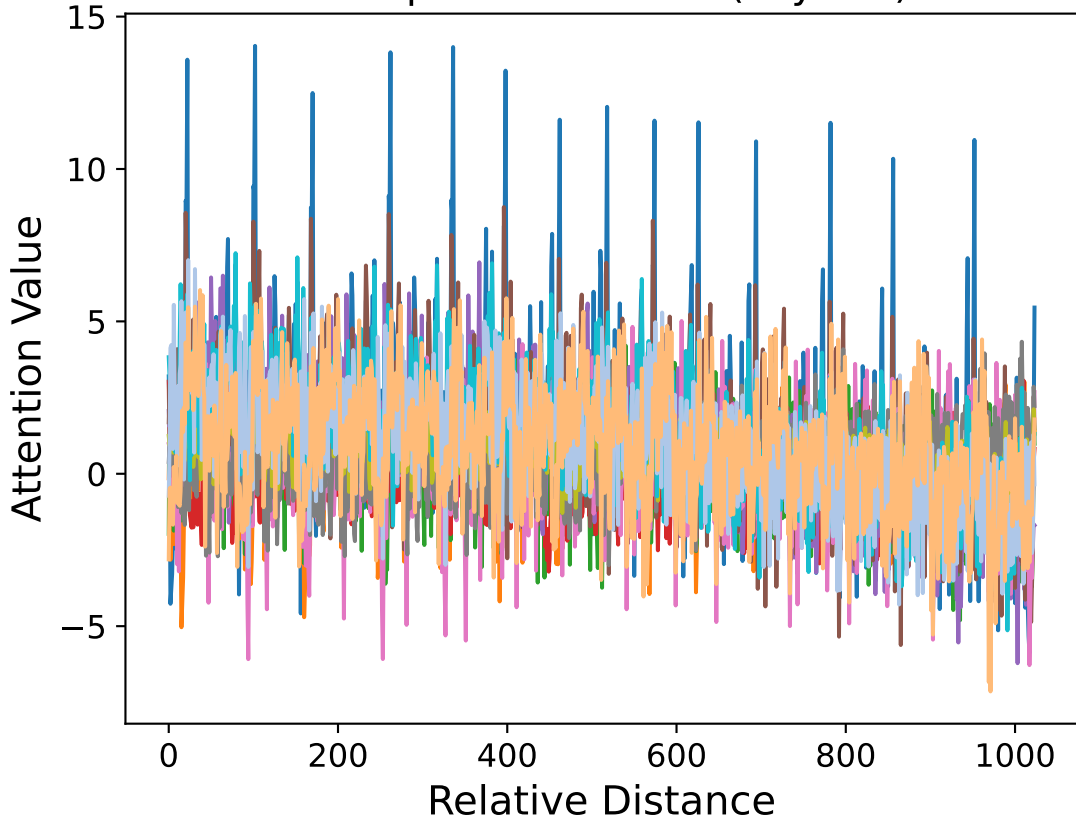

Supplement: supplementary_material [file attachment]

Example 1: Attention (Layer 2)

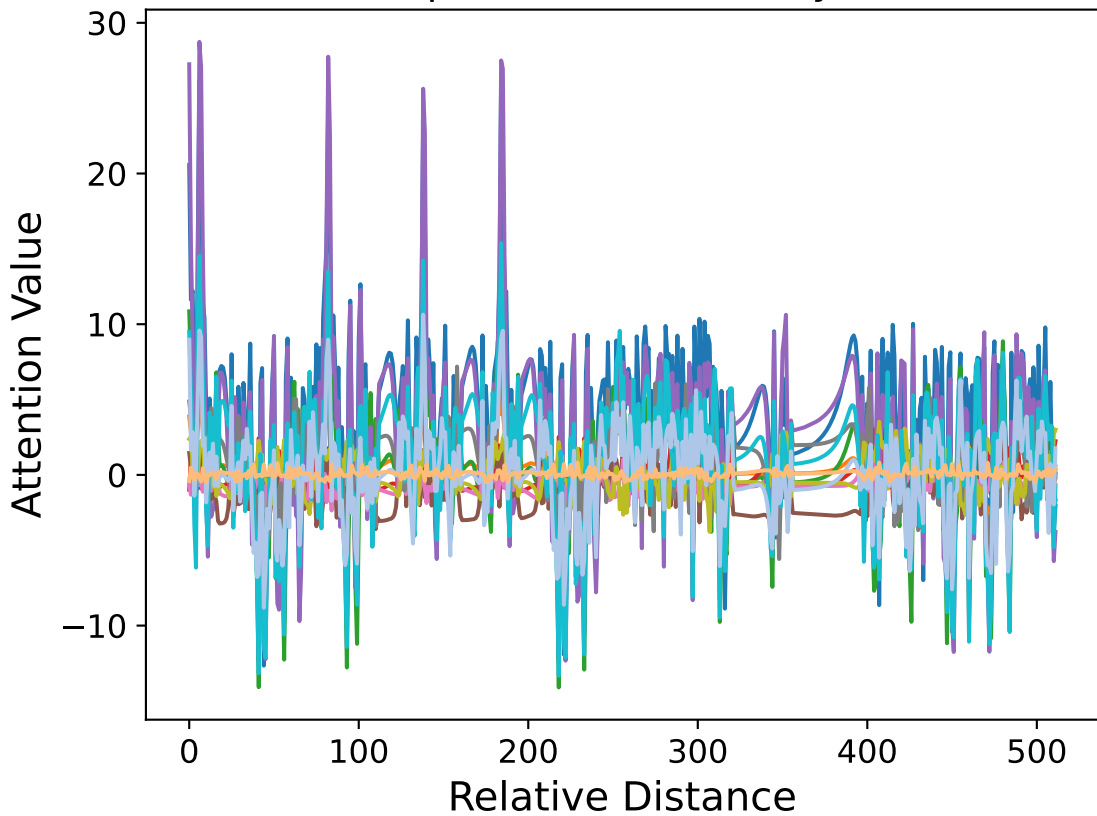

Supplement: supplementary_material [file attachment]

Example 1: Attention (Layer 12)

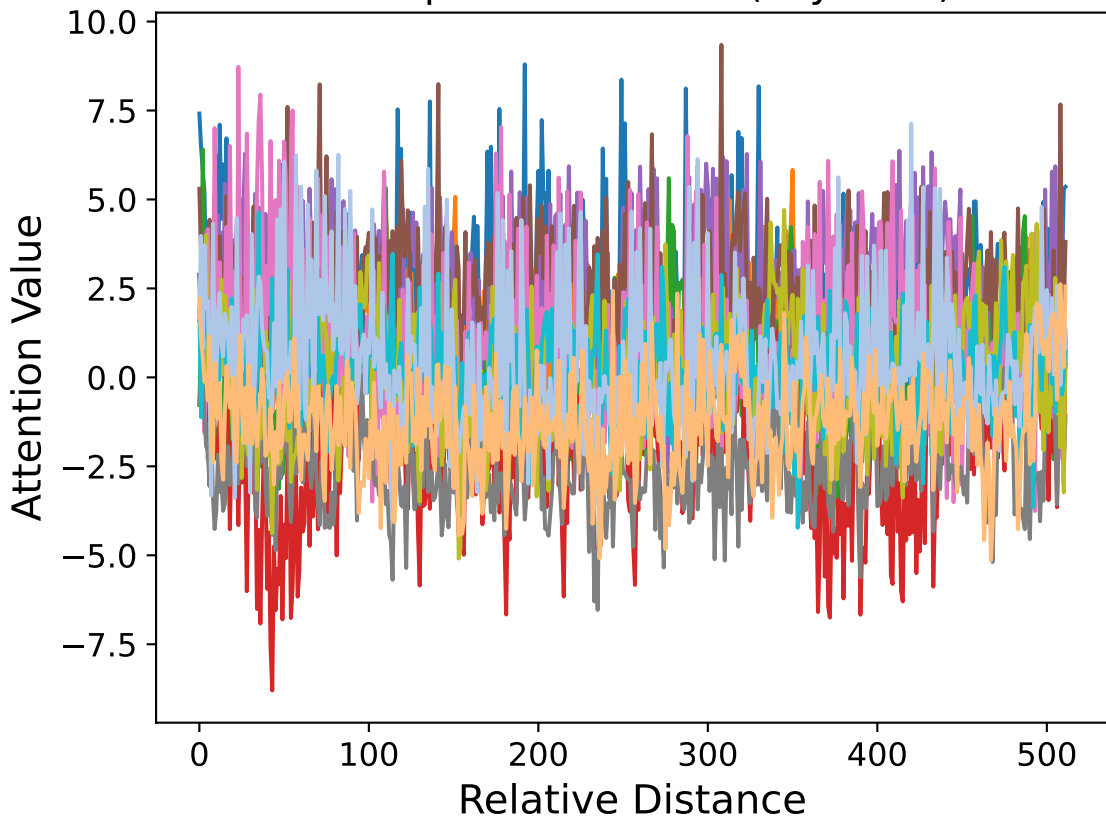

Supplement: supplementary_material [file attachment]

Example 1: Kerple Bias (Layer 11)

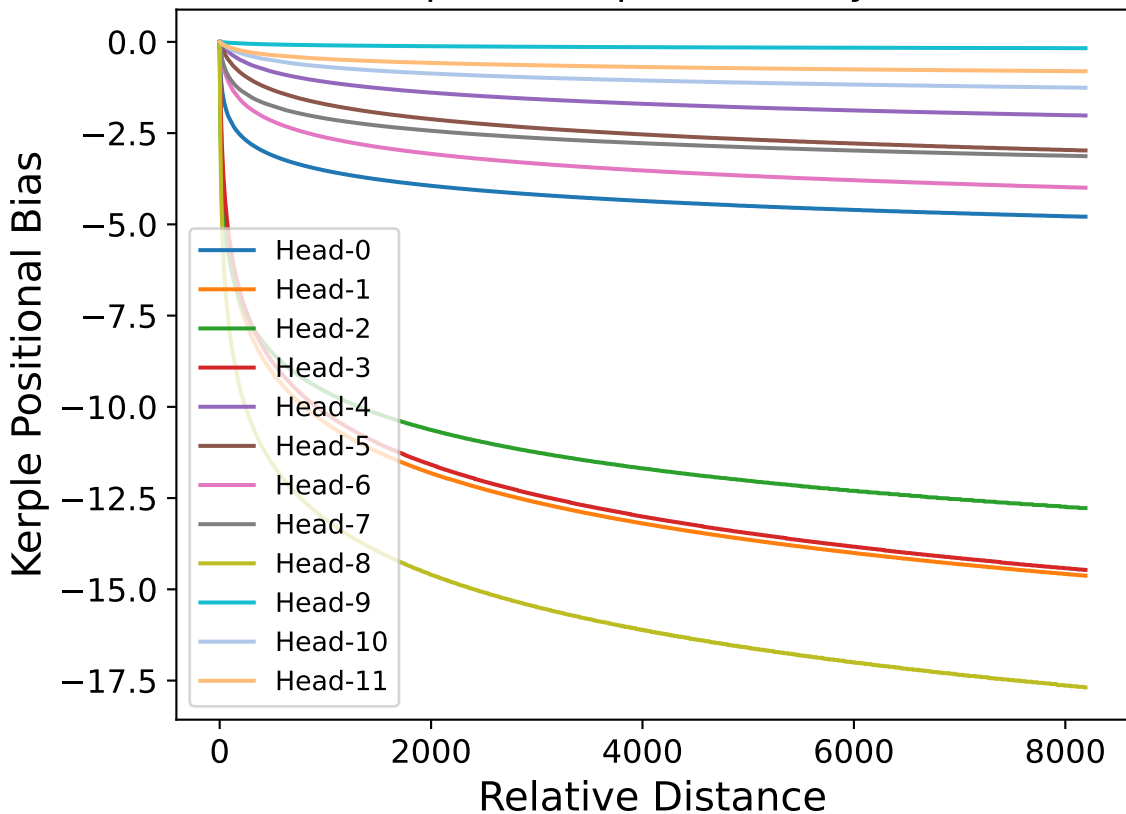

Supplement: supplementary_material [file attachment]

Example 1: DAPE Bias (Layer 6)

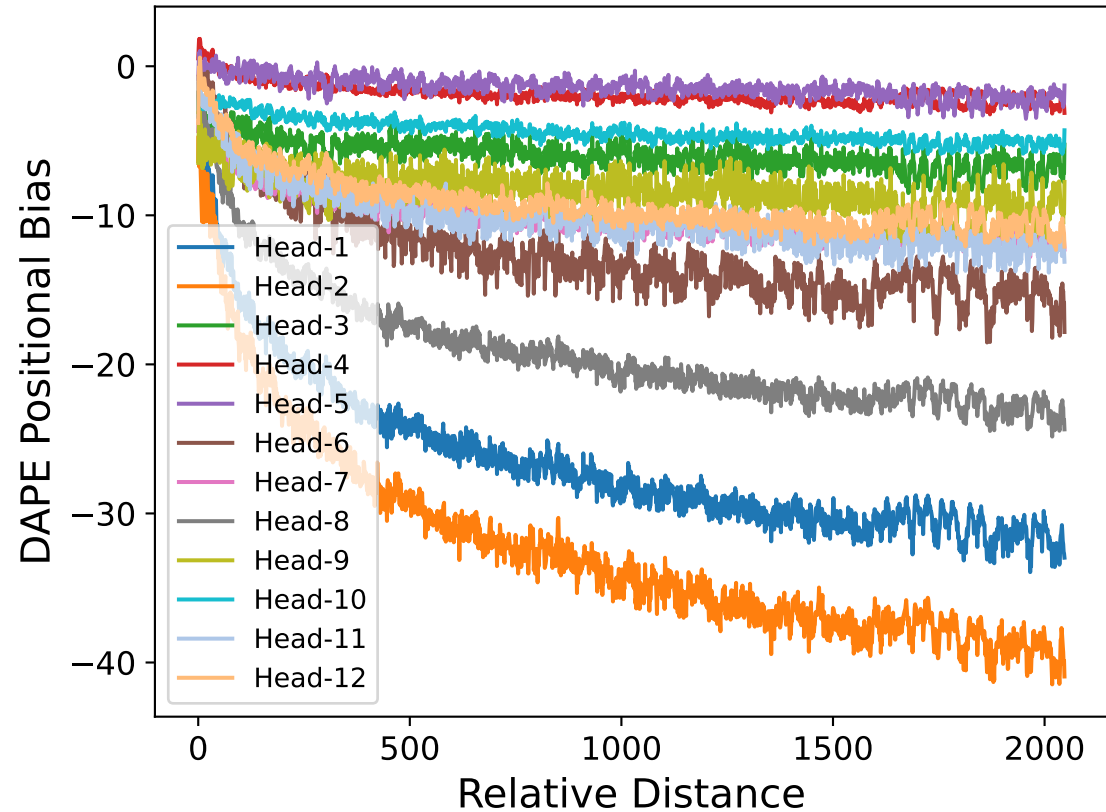

Supplement: supplementary_material [file attachment]

Example 1: Final Attention (Layer 1)

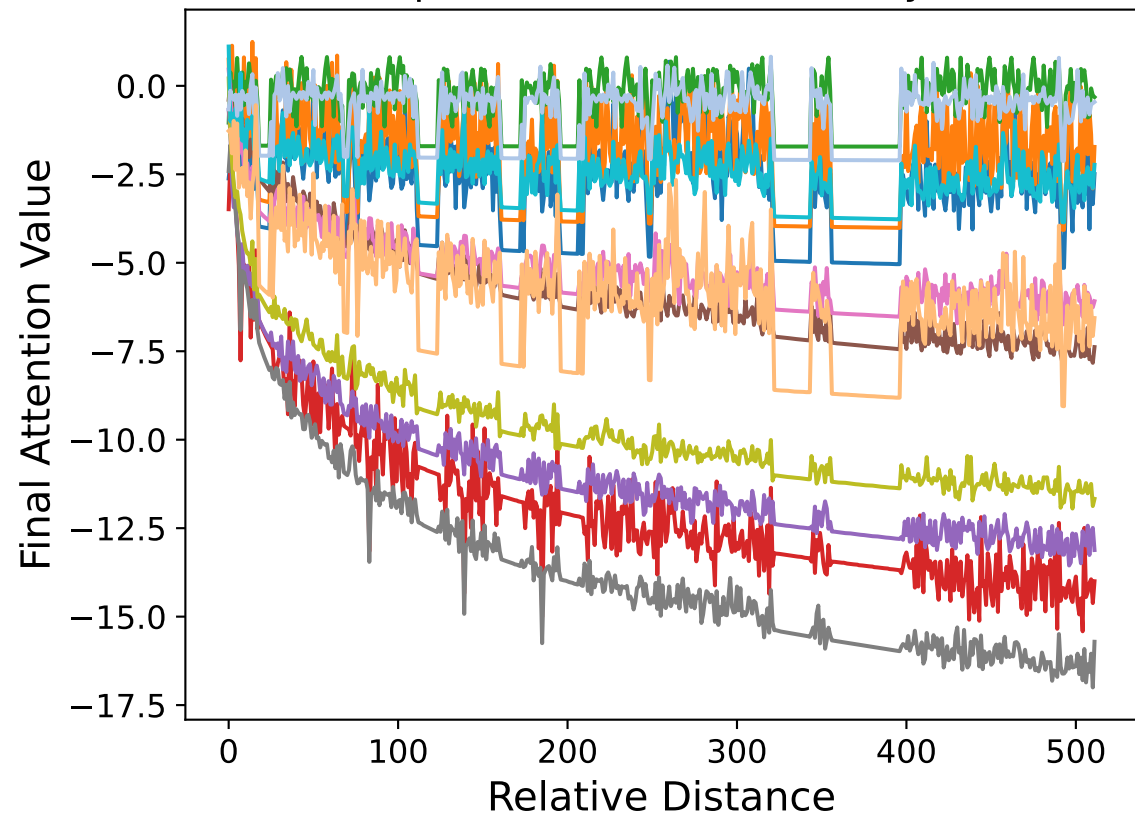

Supplement: supplementary_material [file attachment]

Example 1: Final Attention (Layer 6)

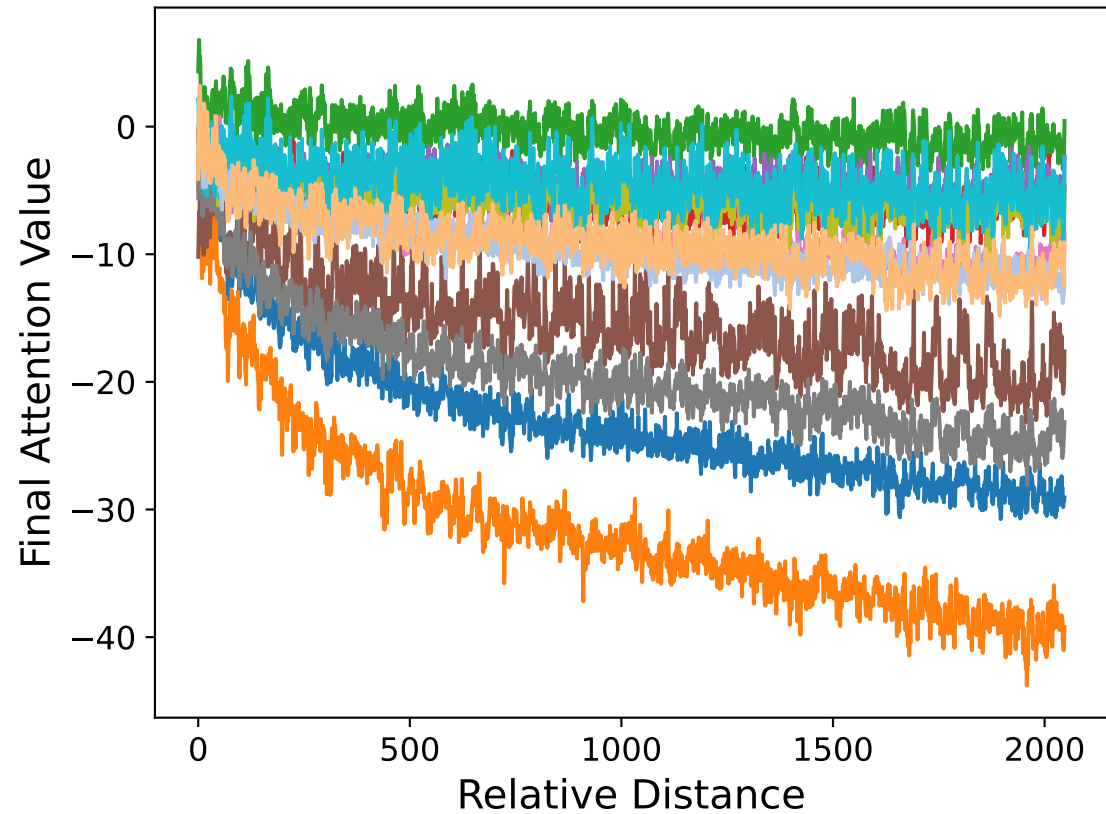

Supplement: supplementary_material [file attachment]

Example 1: Final Attention (Layer 8)

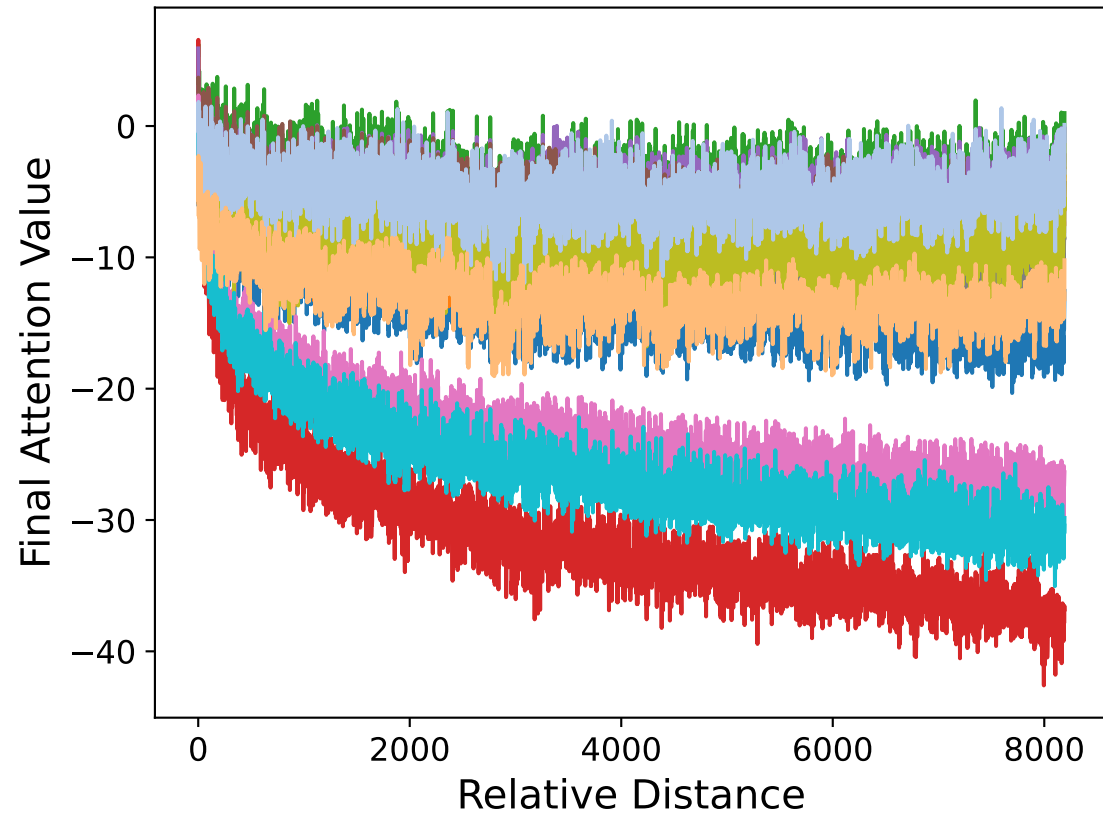

Supplement: supplementary_material [file attachment]

Example 1: Final Attention (Layer 2)

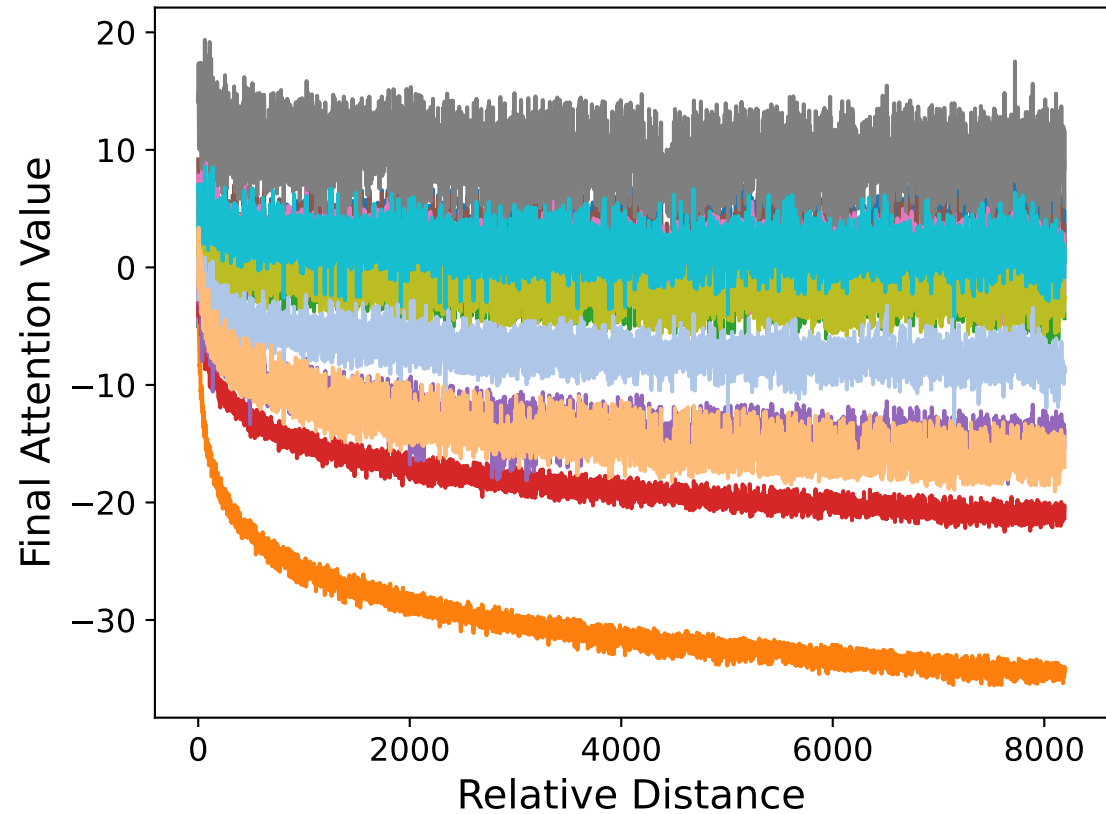

Supplement: supplementary_material [file attachment]

Example 1: Final Attention (Layer 9)

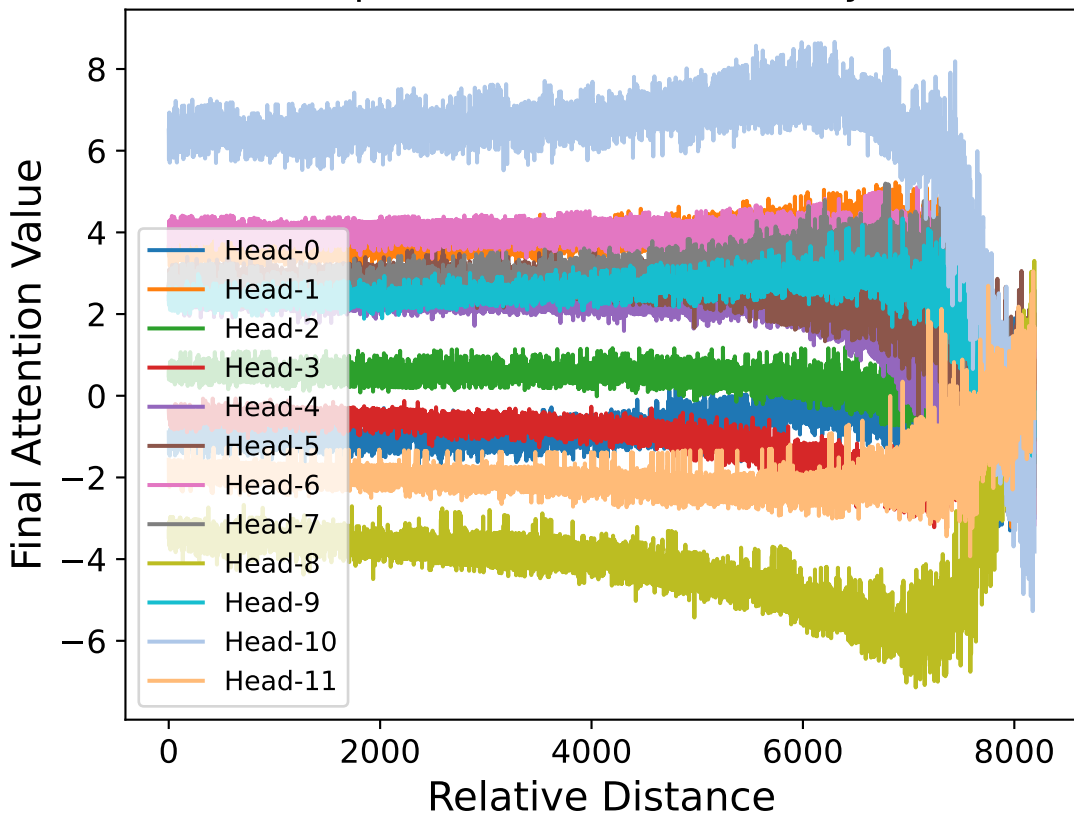

Supplement: supplementary_material [file attachment]

Example 1: Final Attention (Layer 9)

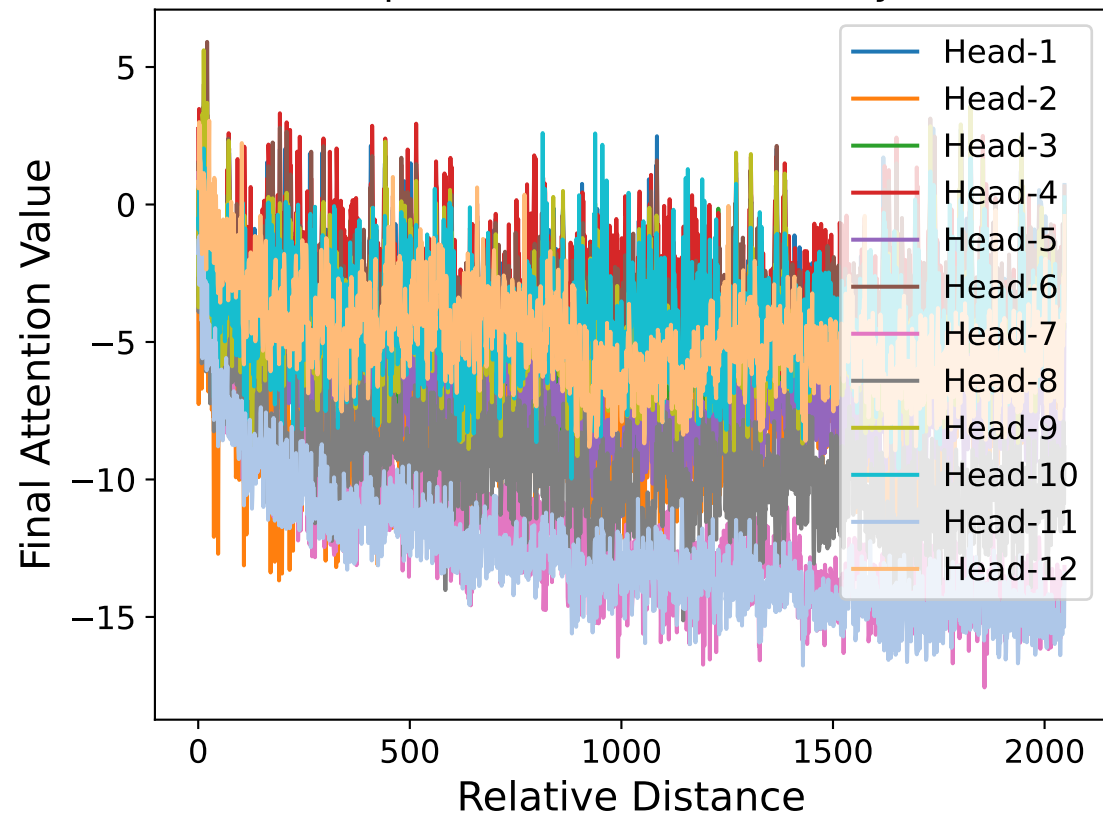

Supplement: supplementary_material [file attachment]

Example 1: Final Attention (Layer 7)

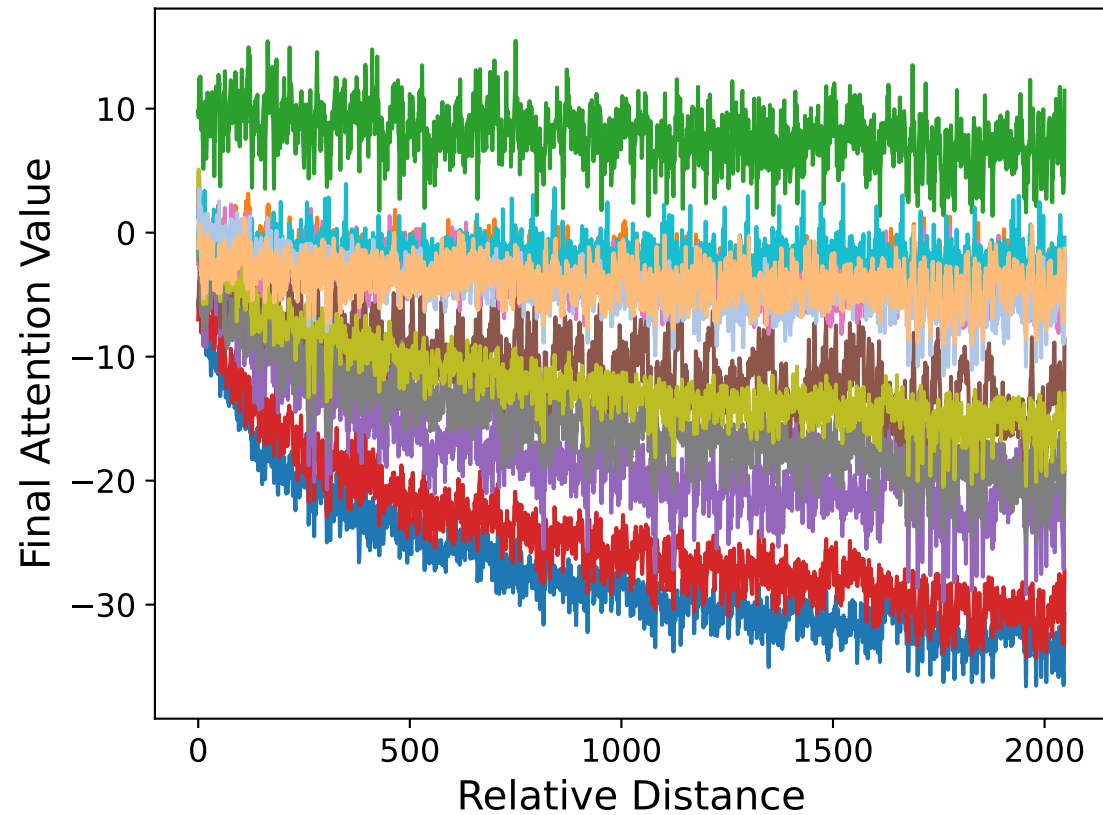

Supplement: supplementary_material [file attachment]

Example 1: Final Attention (Layer 8)

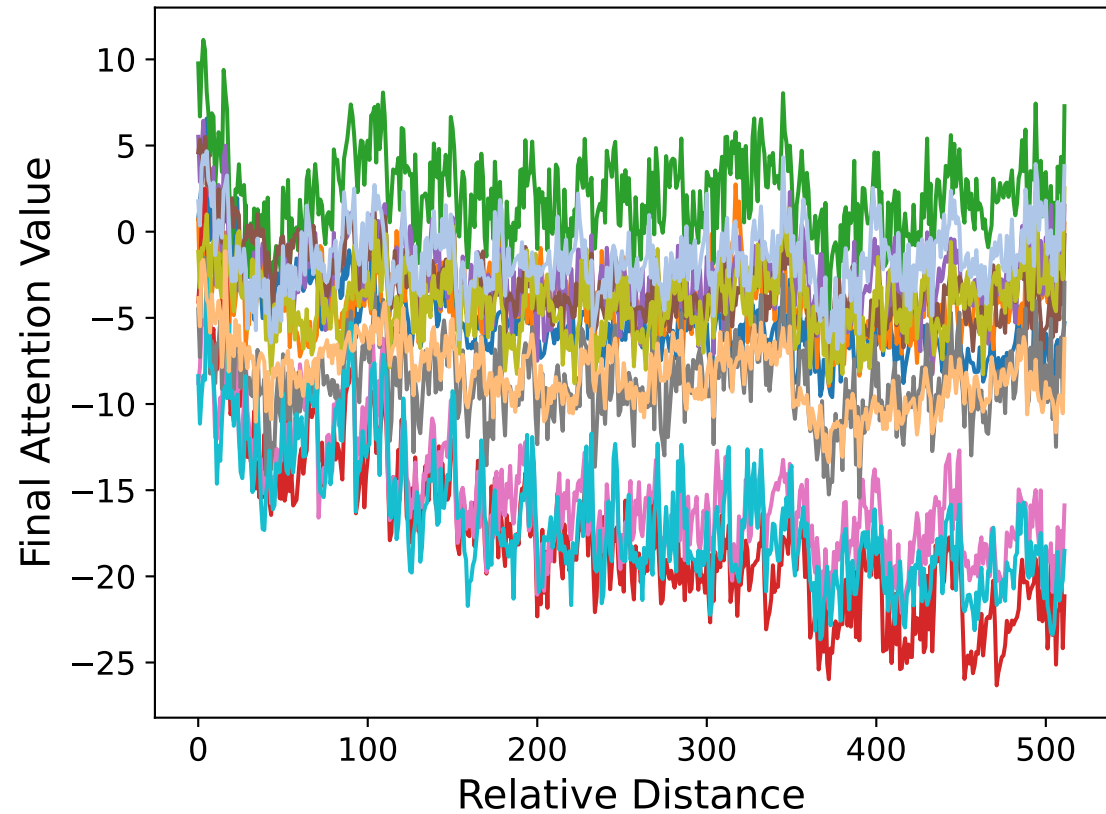

Supplement: supplementary_material [file attachment]

Example 1: DAPE Bias (Layer 8)

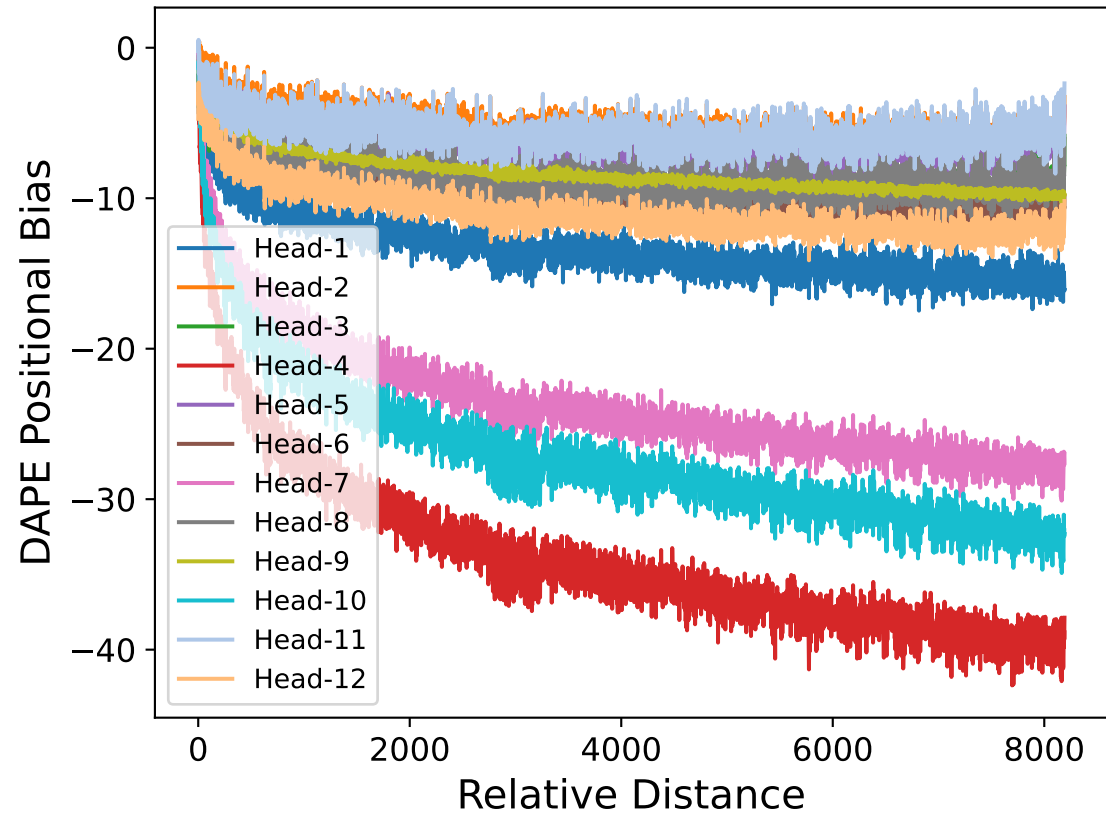

Supplement: supplementary_material [file attachment]

Example 1: DAPE Bias (Layer 3)

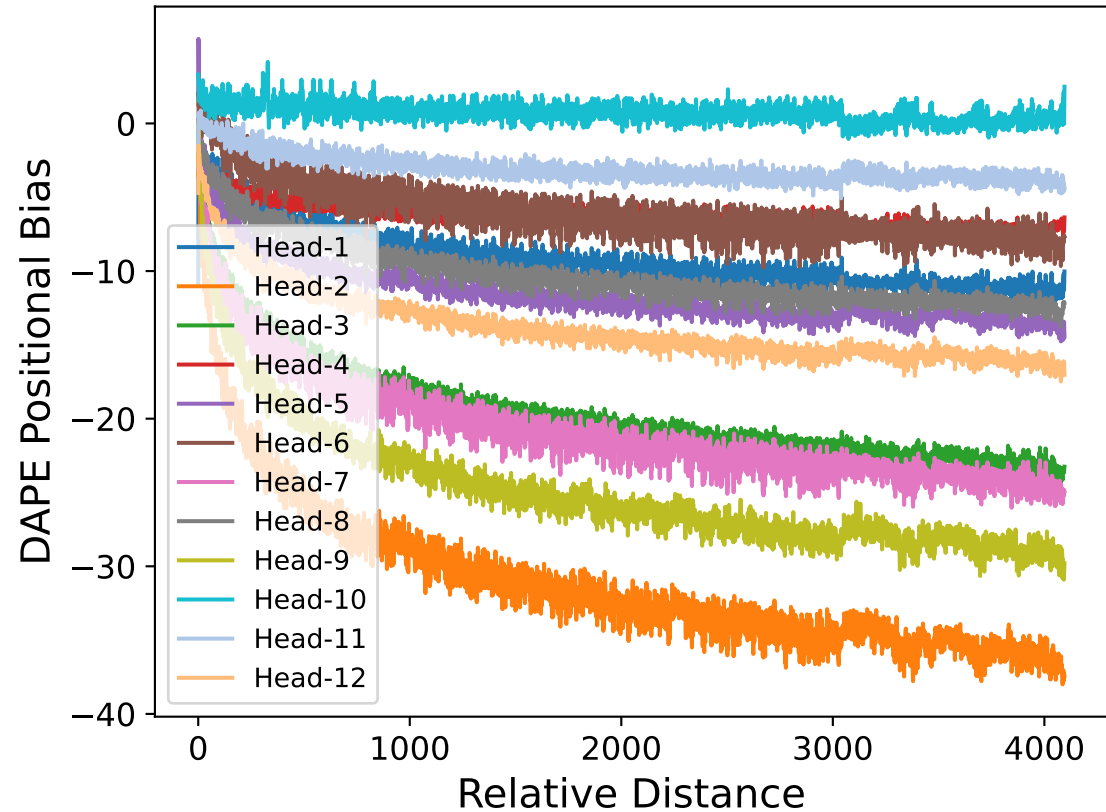

Supplement: supplementary_material [file attachment]

Example 1: Attention (Layer 7)

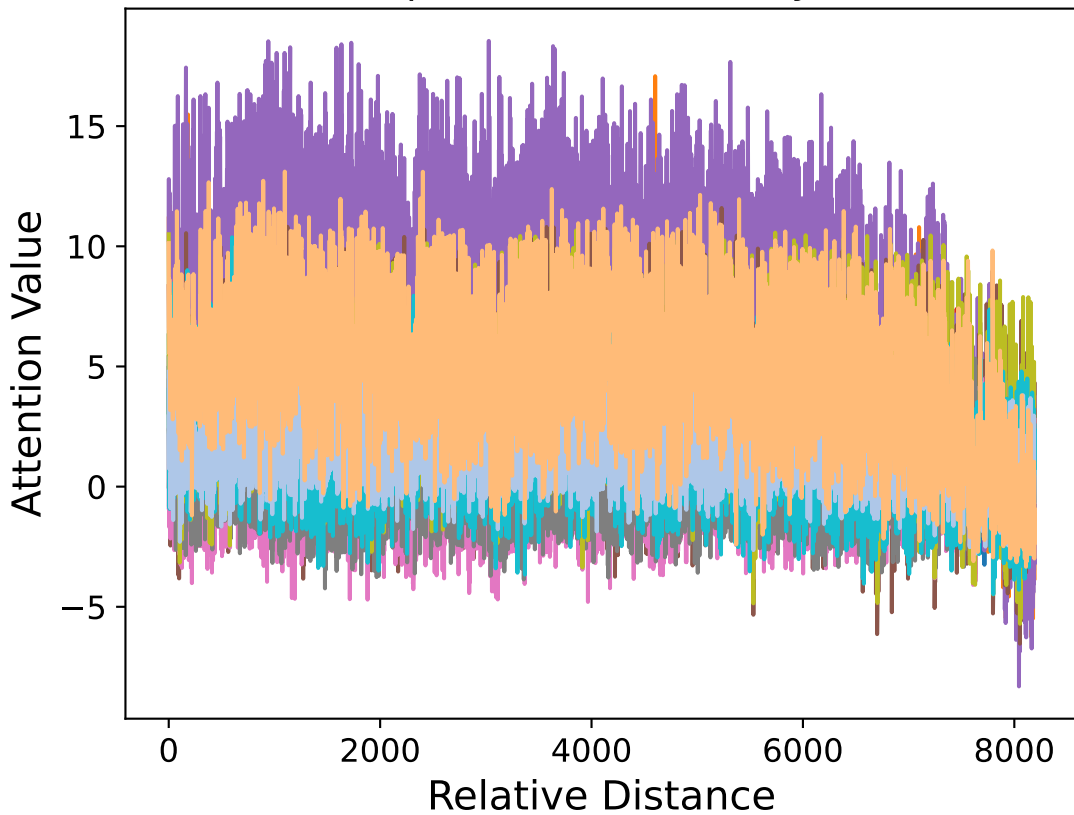

Supplement: supplementary_material [file attachment]

Example 1: Attention (Layer 3)

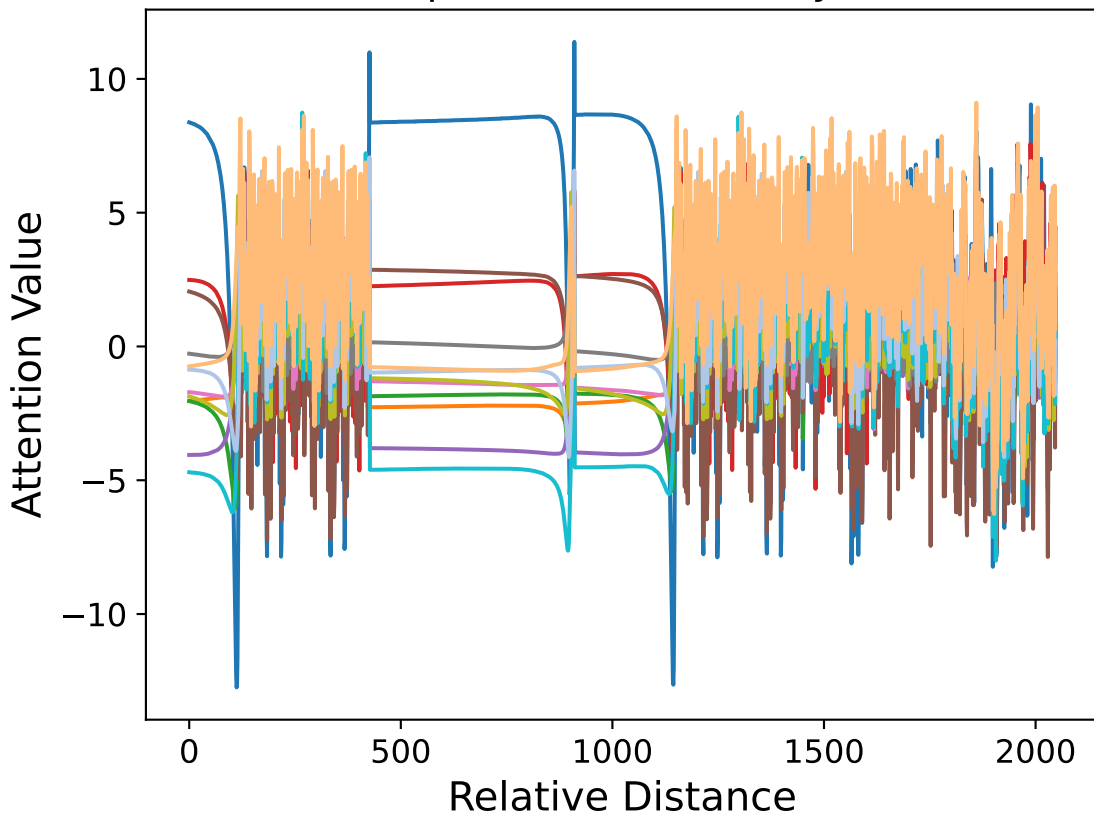

Supplement: supplementary_material [file attachment]

Example 1: Final Attention (Layer 5)

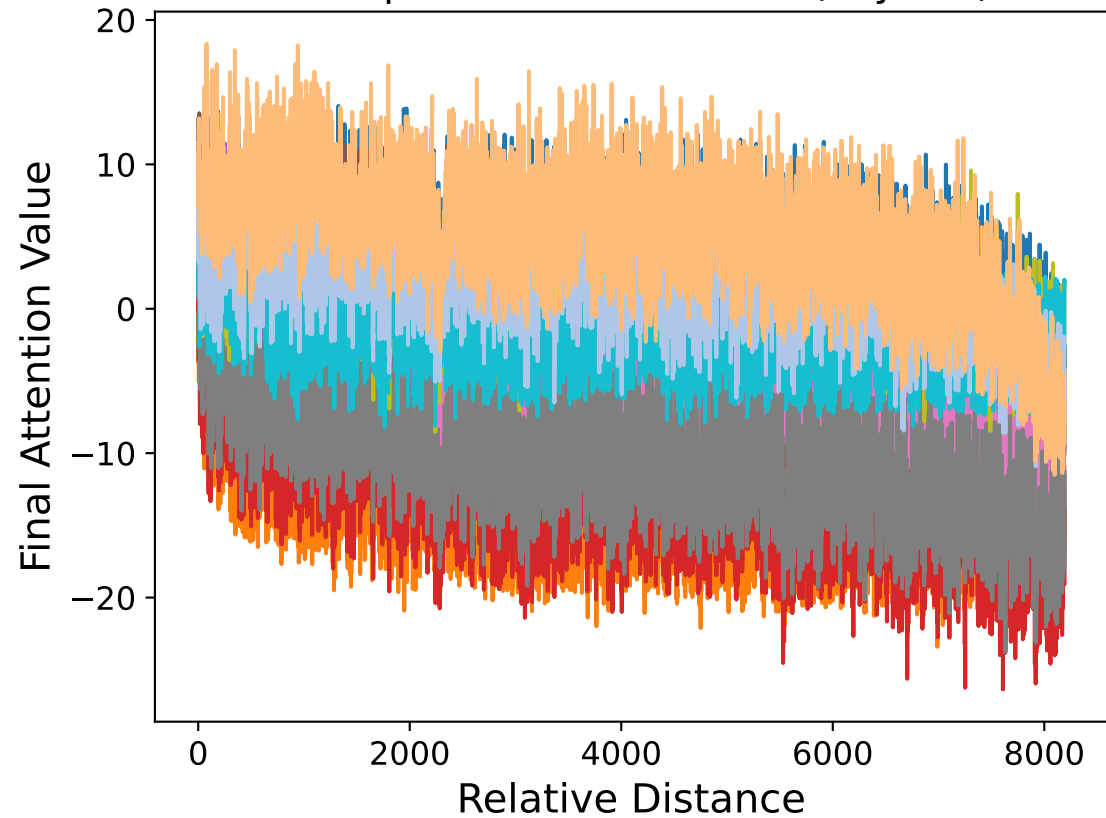

Supplement: supplementary_material [file attachment]

Example 1: Attention (Layer 6)

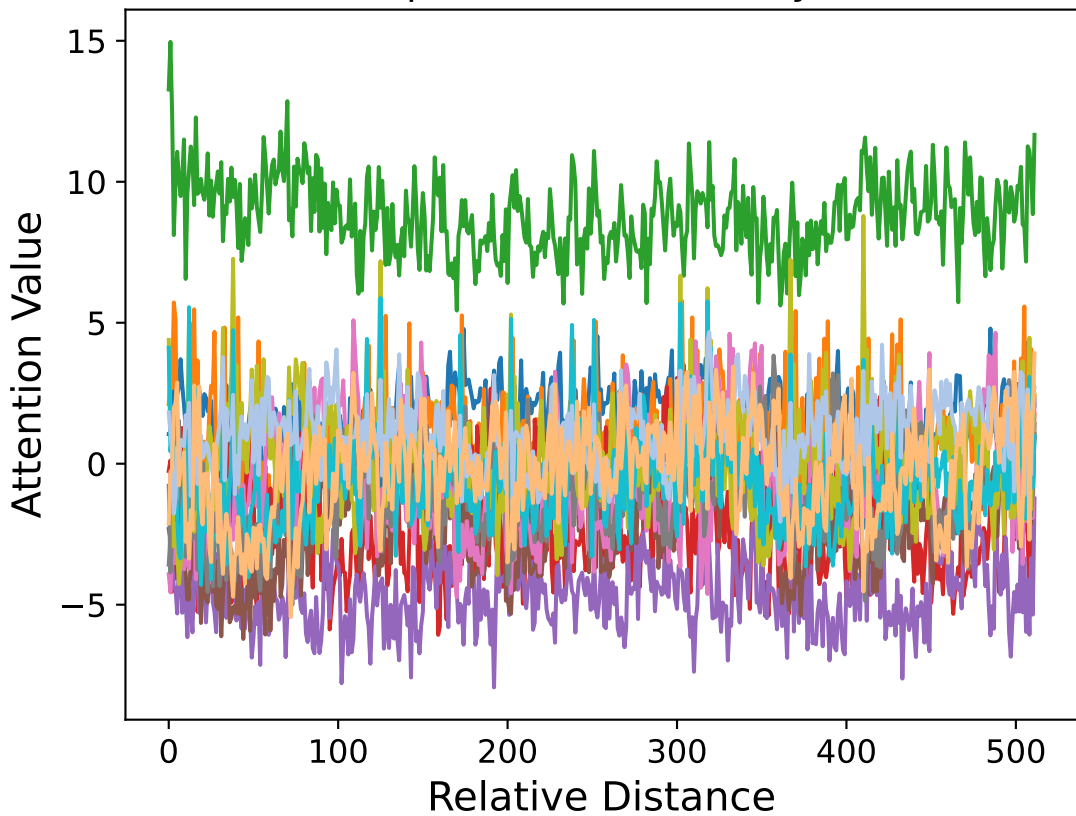

Supplement: supplementary_material [file attachment]

Example 1: Final Attention (Layer 8)

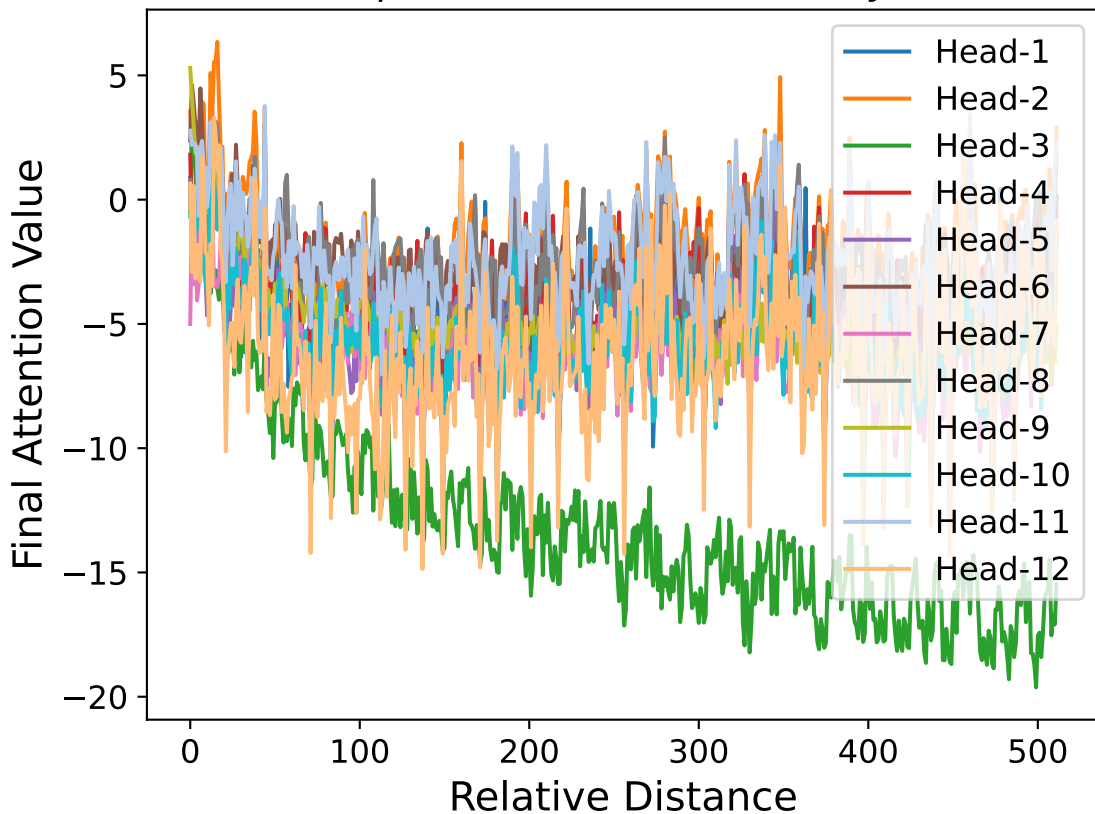

Supplement: supplementary_material [file attachment]

Example 1: Final Attention (Layer 2)

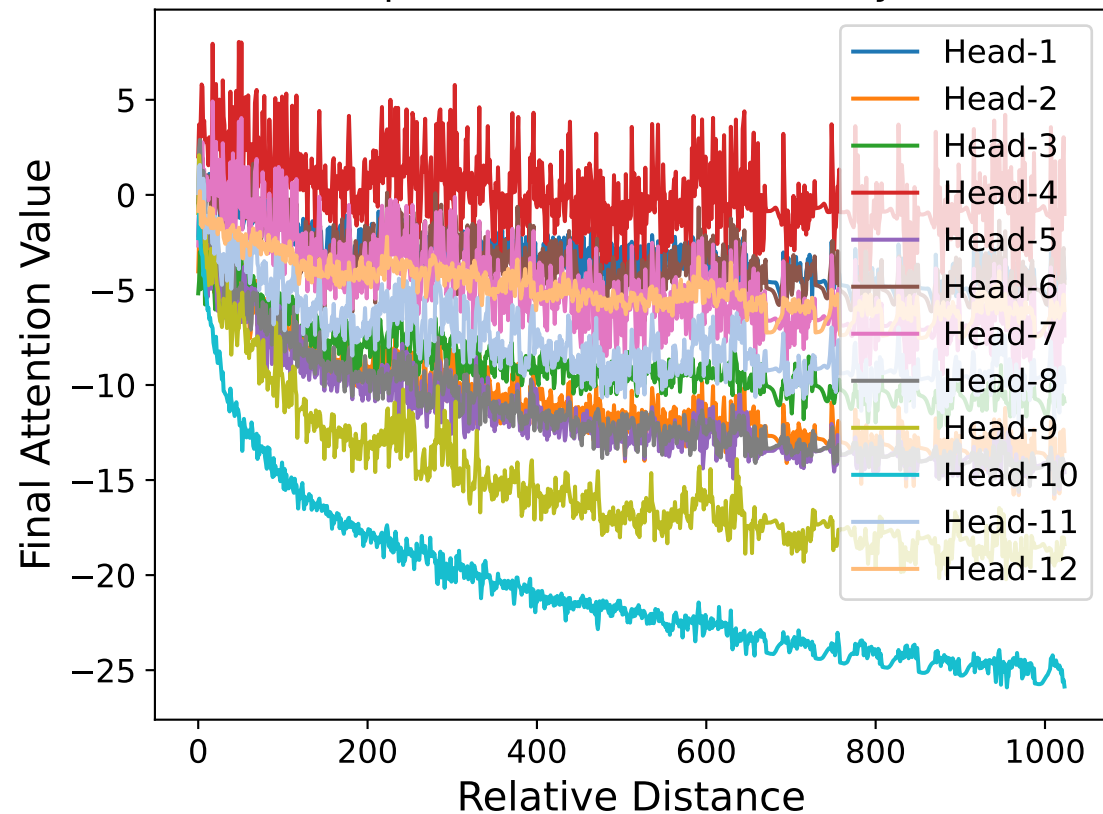

Supplement: supplementary_material [file attachment]

Example 1: Attention (Layer 1)

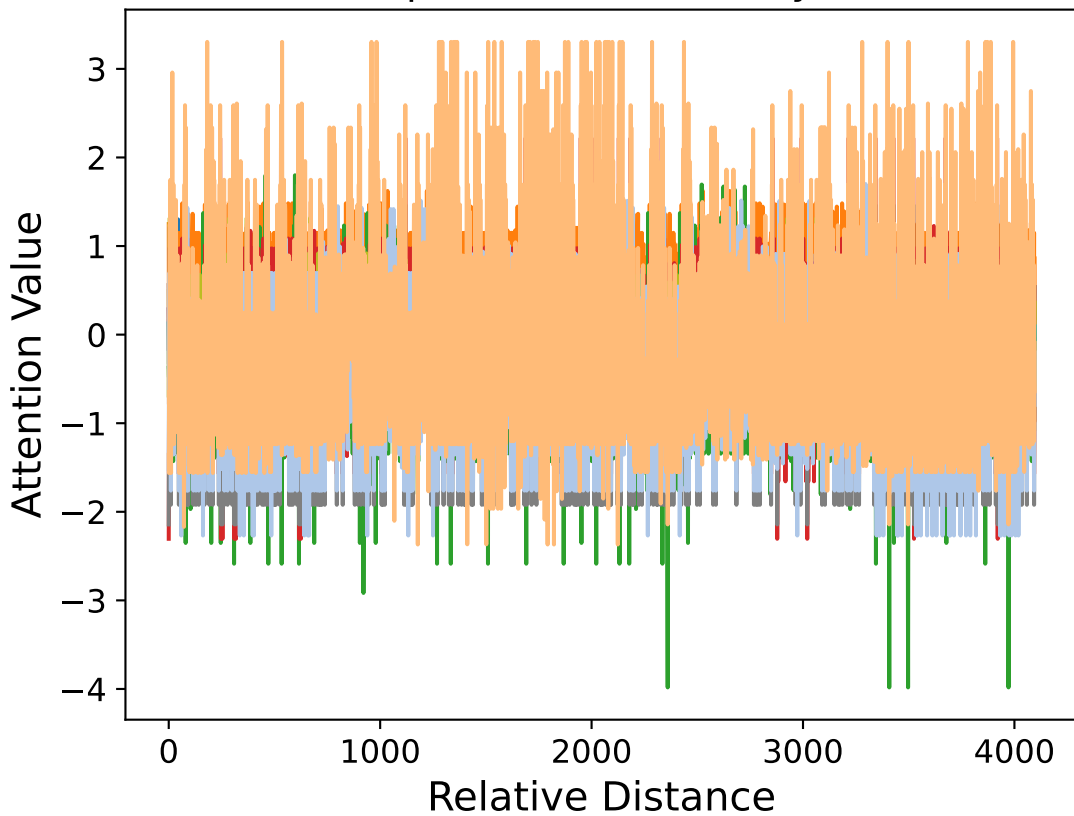

Supplement: supplementary_material [file attachment]

### Example 1: Final Attention (Layer 3)

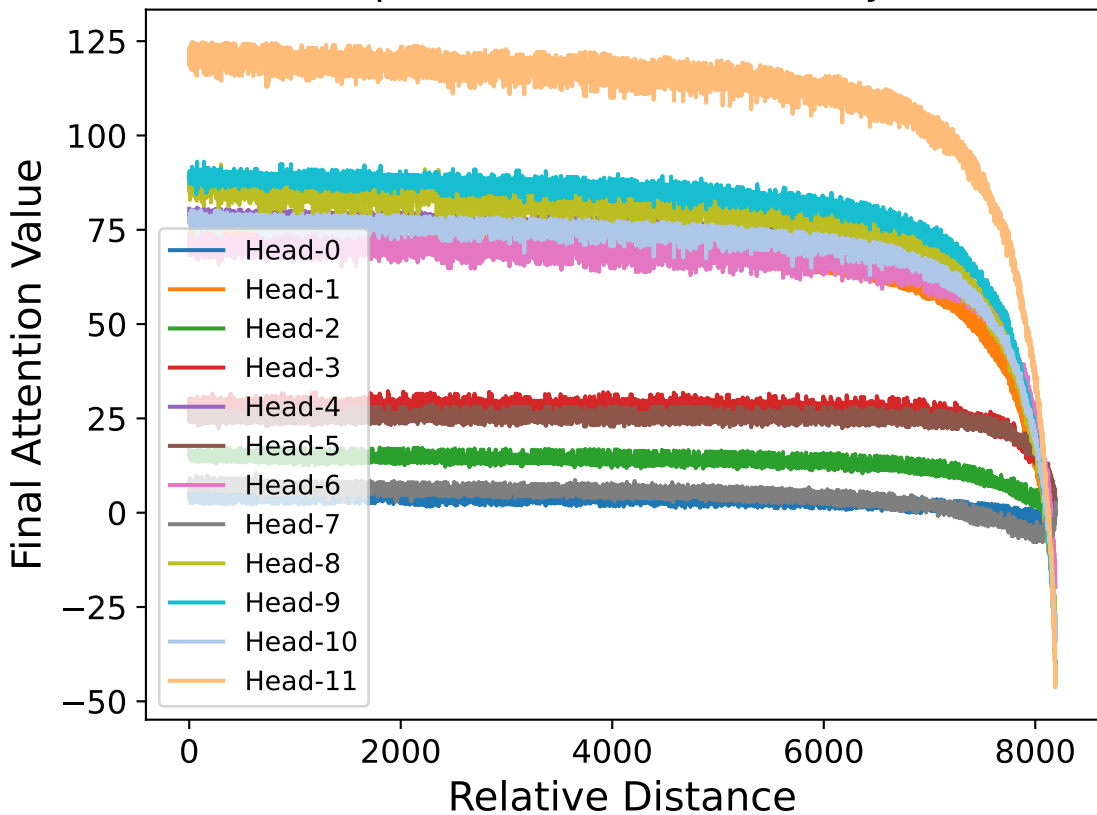

Supplement: supplementary_material [file attachment]

Example 1: Final Attention (Layer 4)

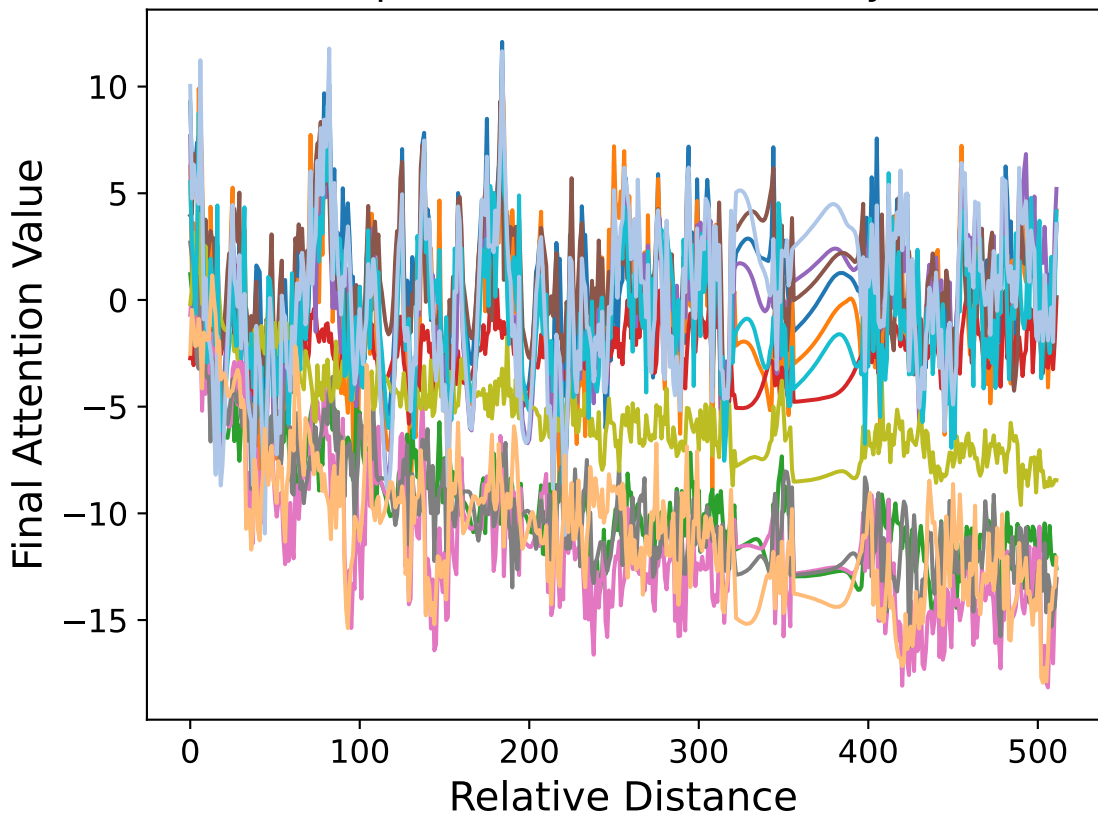

Supplement: supplementary_material [file attachment]

Example 1: DAPE Bias (Layer 7)

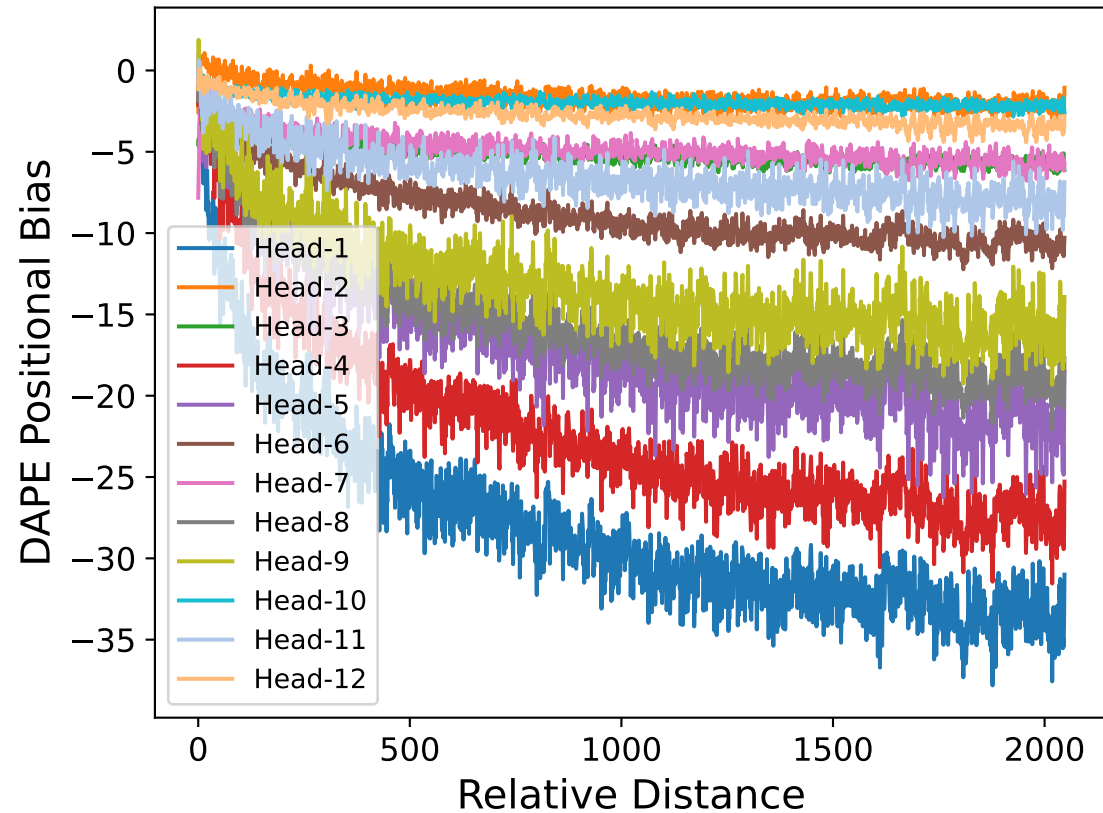

Supplement: supplementary_material [file attachment]

Example 1: Attention (Layer 6)

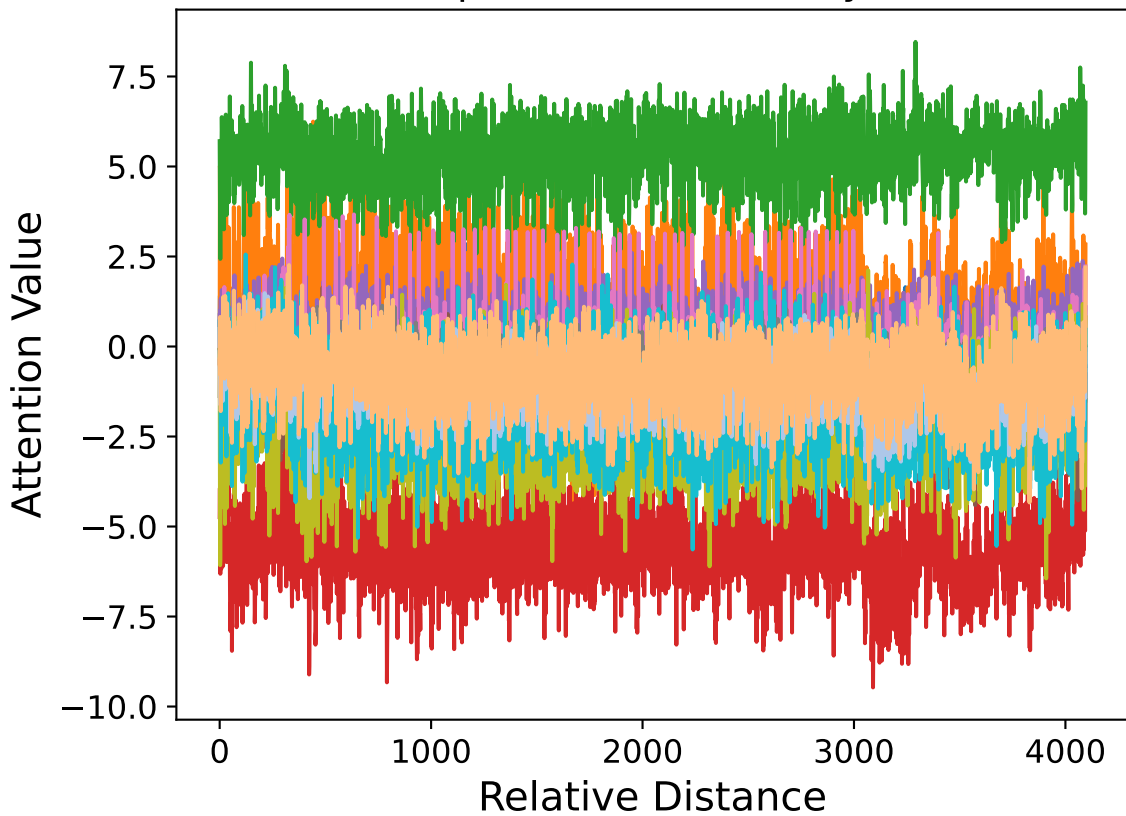

Supplement: supplementary_material [file attachment]

Example 1: Attention (Layer 3)

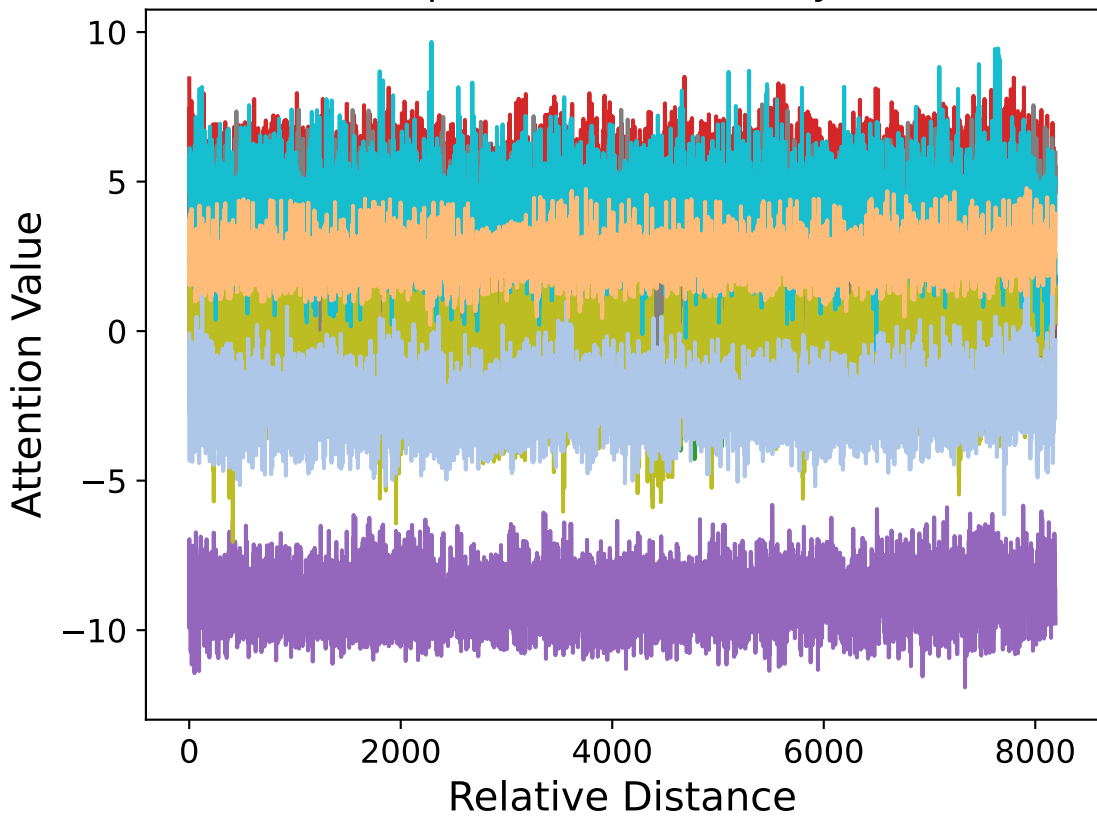

Supplement: supplementary_material [file attachment]

Example 1: Final Attention (Layer 6)

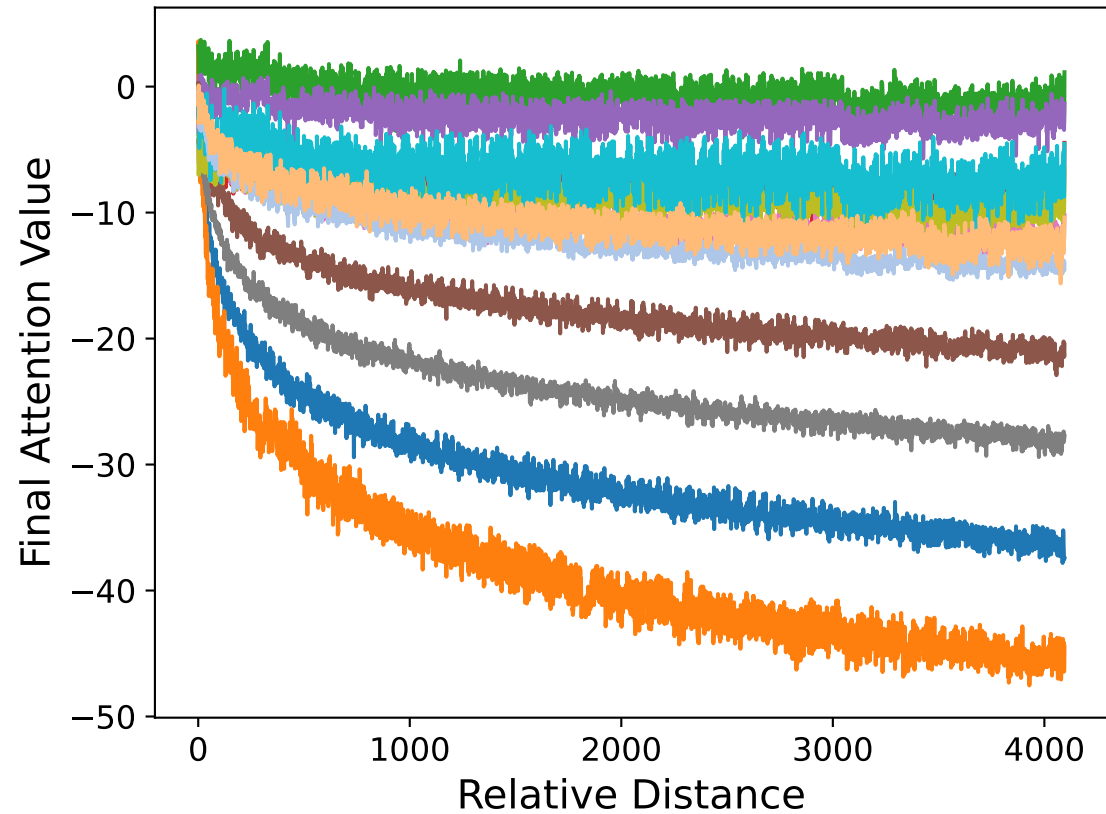

Supplement: supplementary_material [file attachment]

Example 1: Attention (Layer 9)

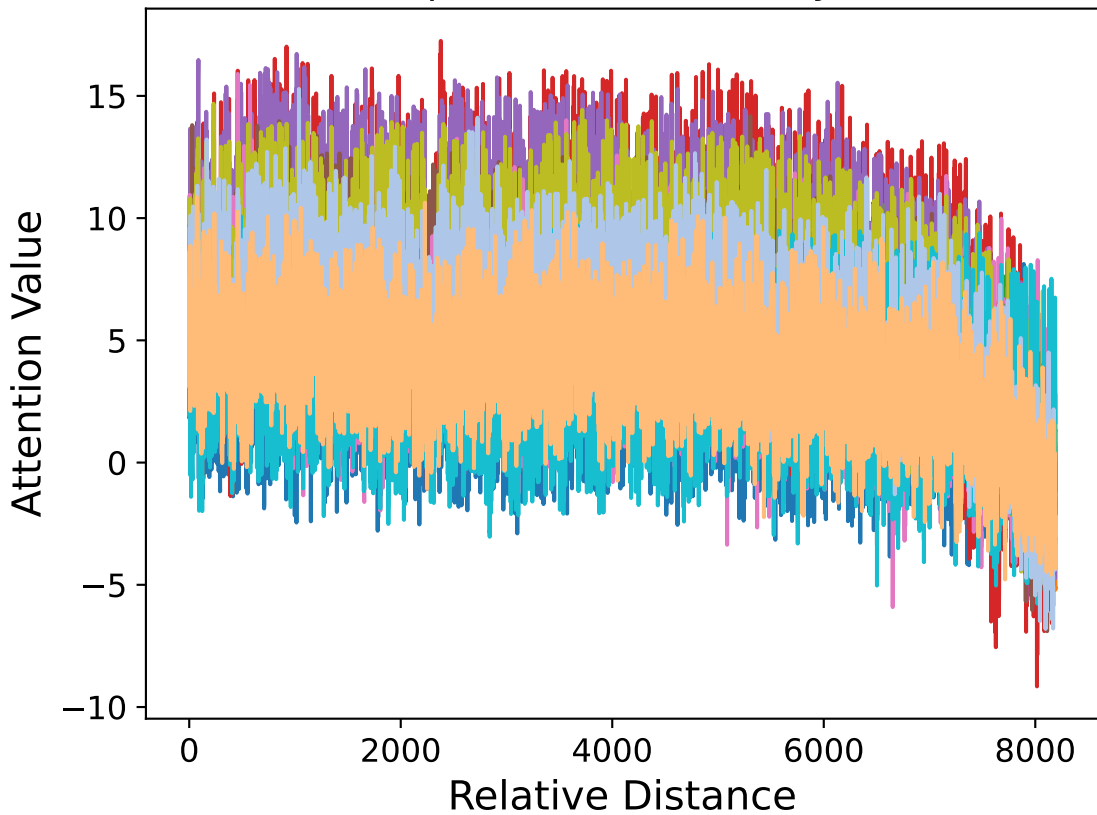

Supplement: supplementary_material [file attachment]

Example 1: Attention (Layer 11)

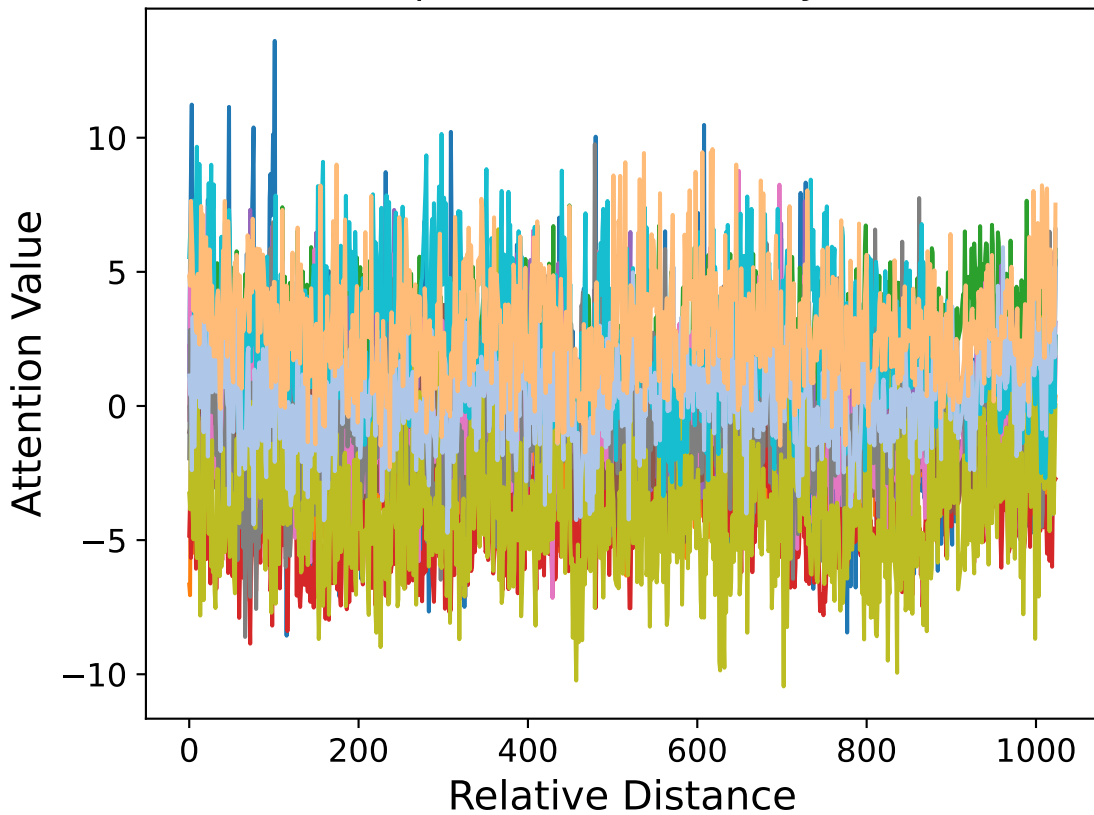

Supplement: supplementary_material [file attachment]

Example 1: DAPE Bias (Layer 6)

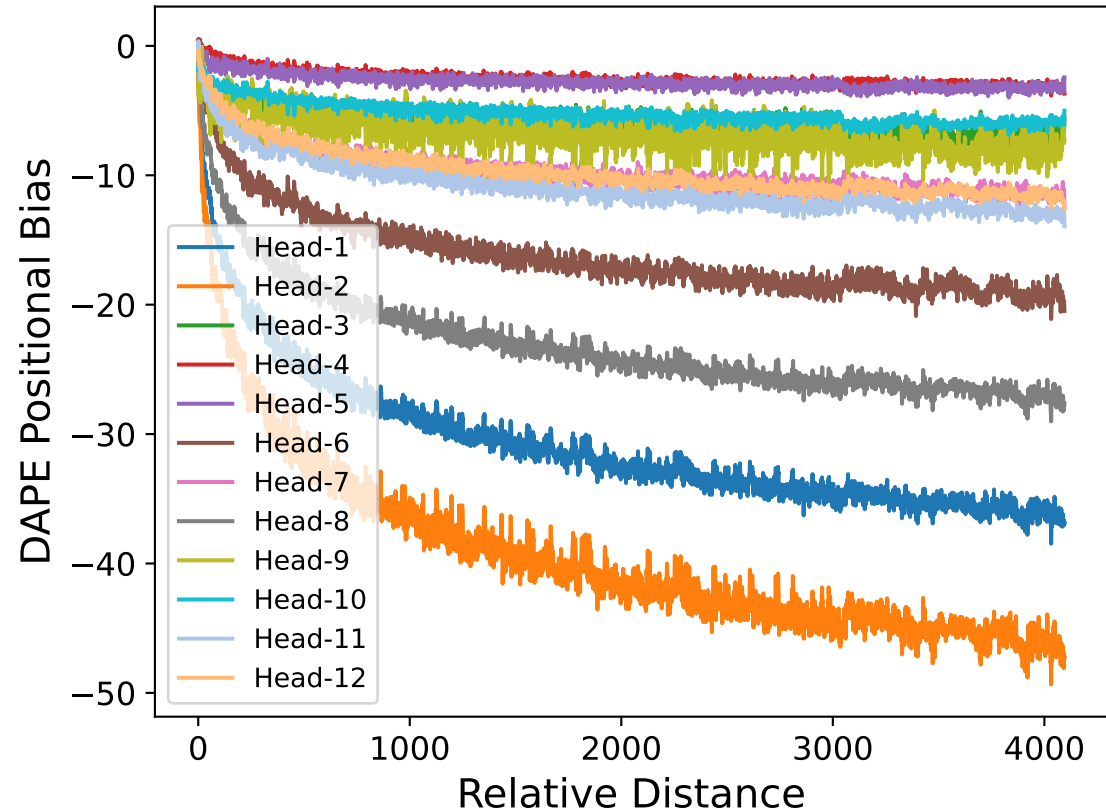

Supplement: supplementary_material [file attachment]

Example 1: DAPE Bias (Layer 3)

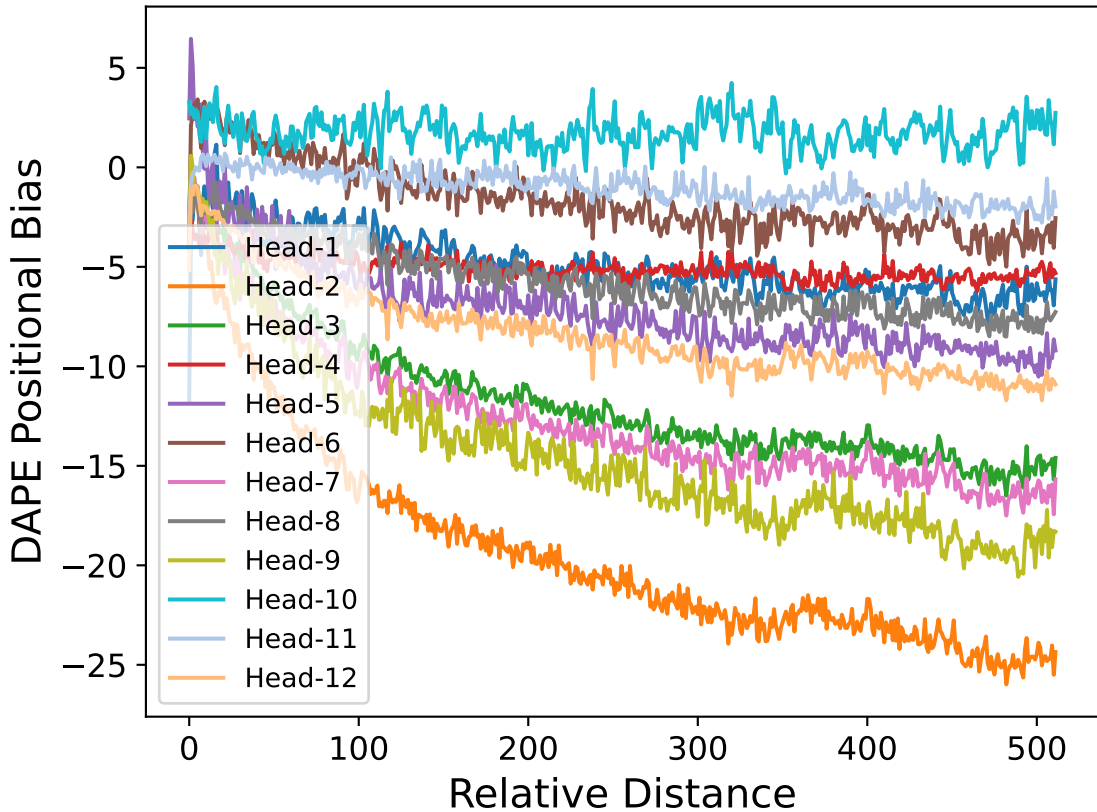

Supplement: supplementary_material [file attachment]

Example 1: DAPE Bias (Layer 2)

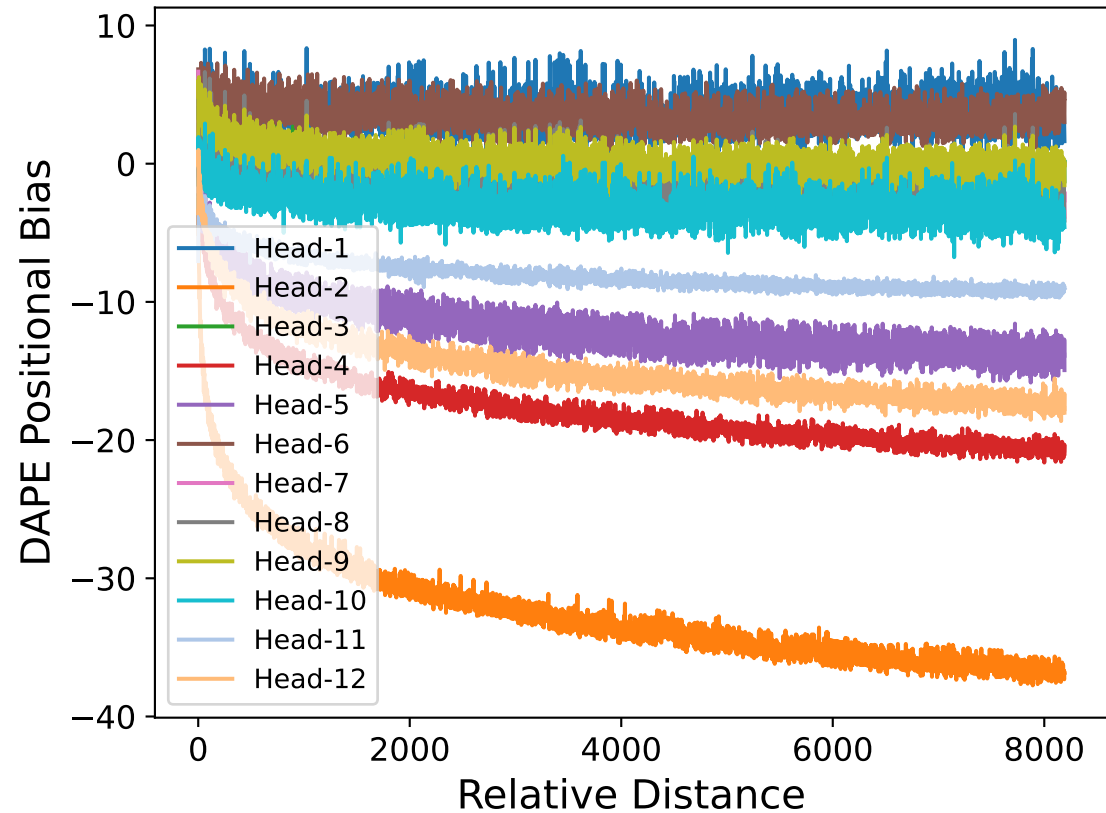

Supplement: supplementary_material [file attachment]

Example 1: Final Attention (Layer 12)

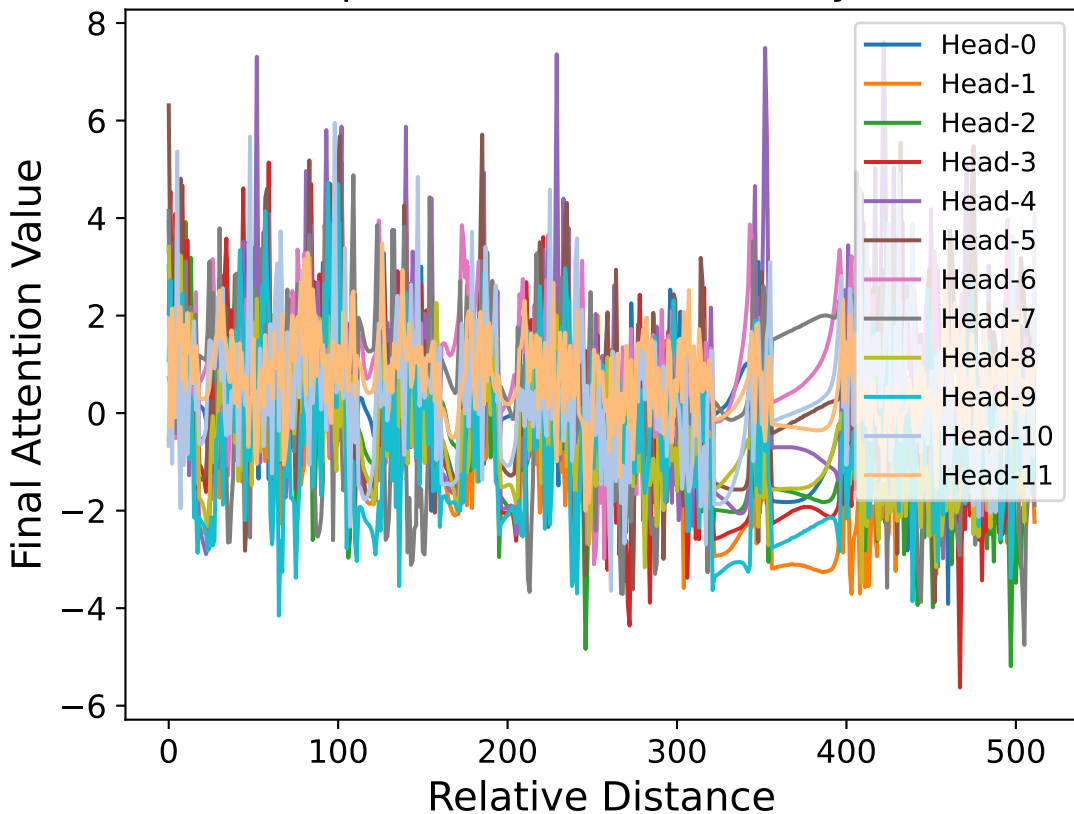

Supplement: supplementary_material [file attachment]

Example 1: Final Attention (Layer 3)

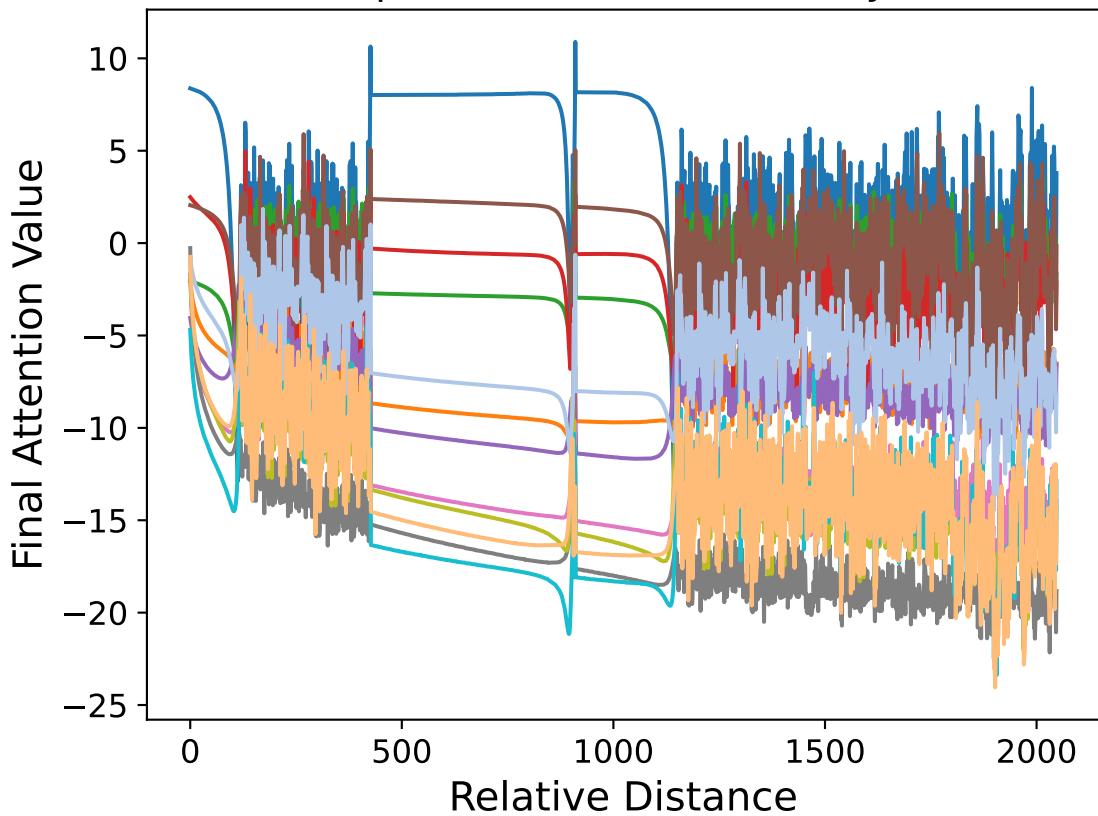

Supplement: supplementary_material [file attachment]

Example 1: Final Attention (Layer 4)

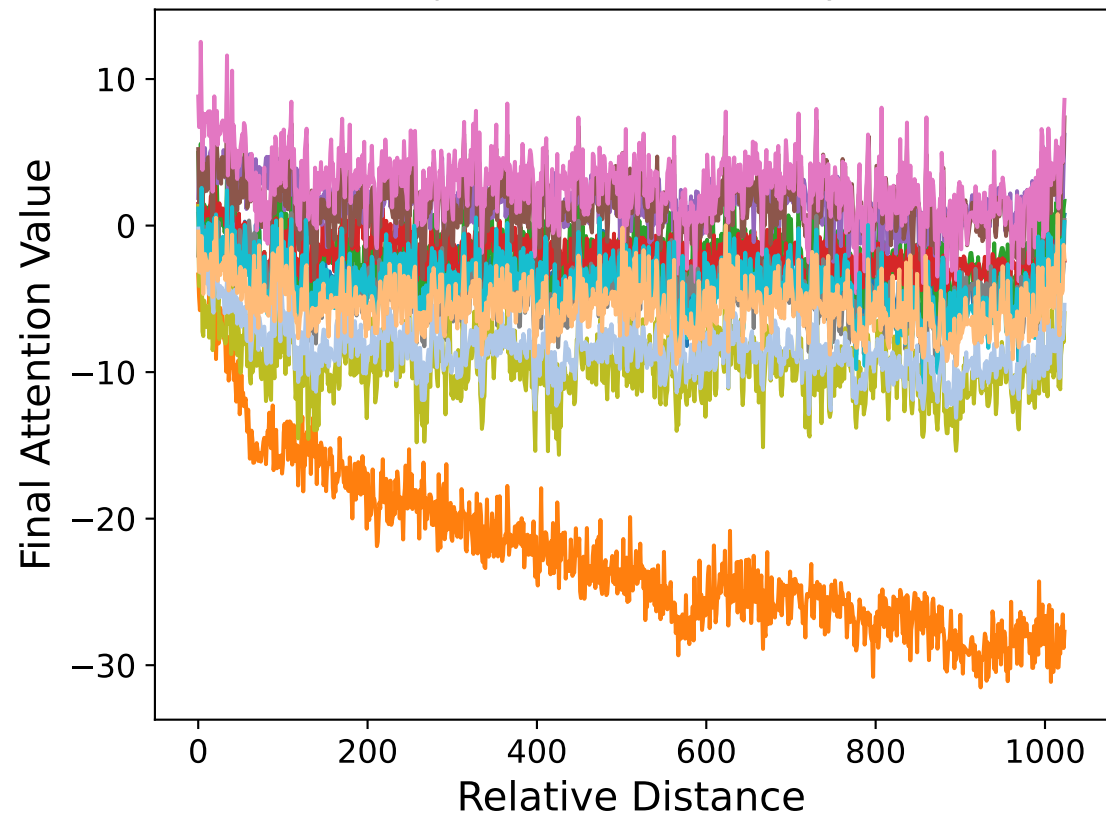

Supplement: supplementary_material [file attachment]

Example 1: DAPE Bias (Layer 1)

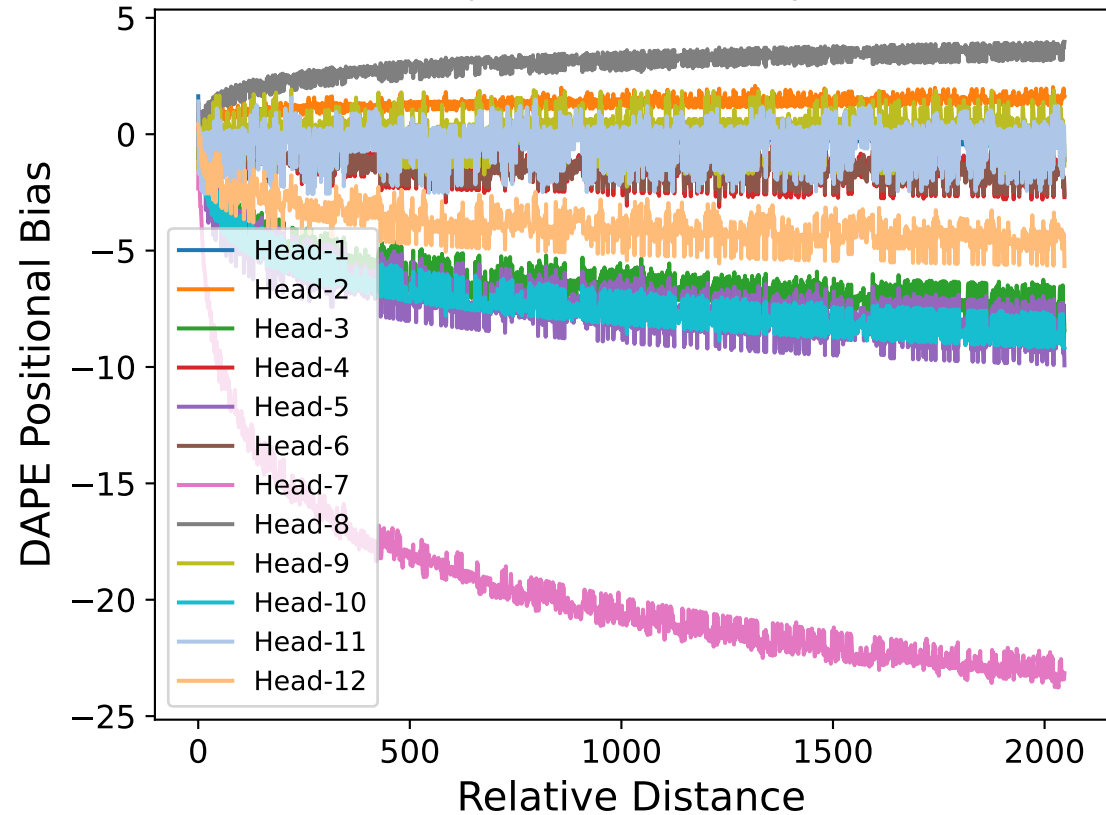

Supplement: supplementary_material [file attachment]

Example 1: Attention (Layer 2)

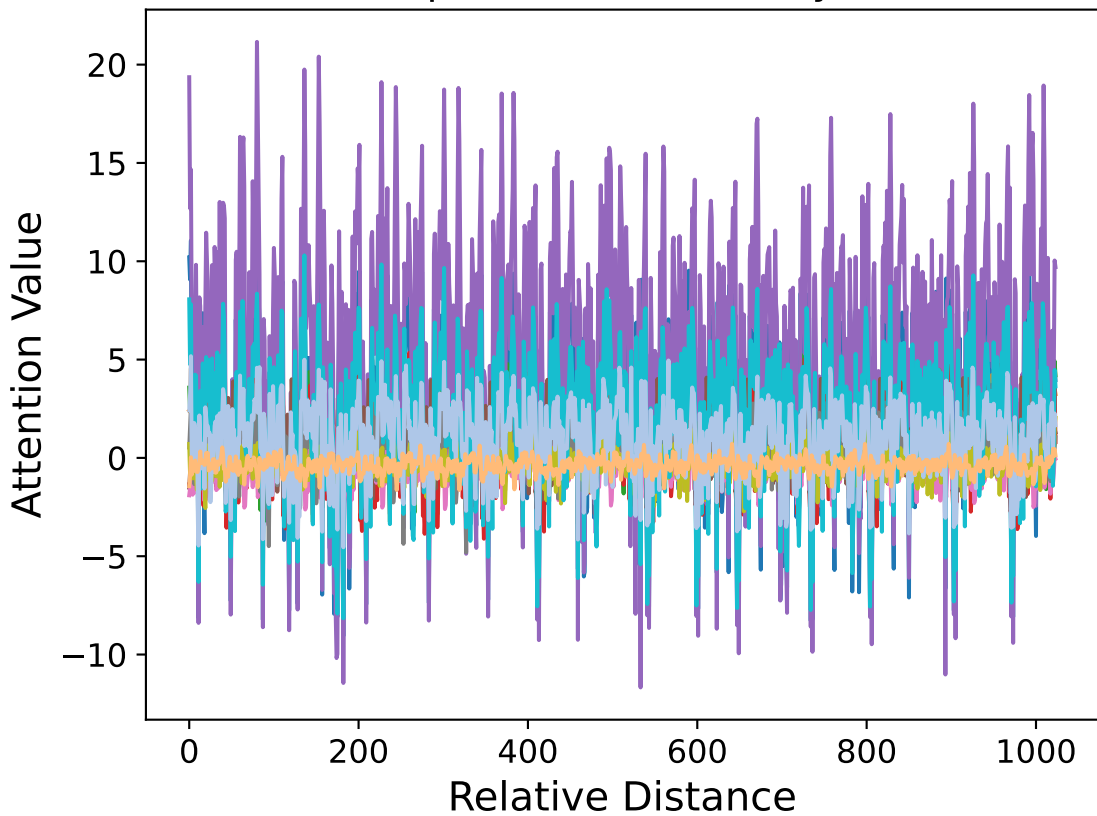

Supplement: supplementary_material [file attachment]

Example 1: Final Attention (Layer 9)

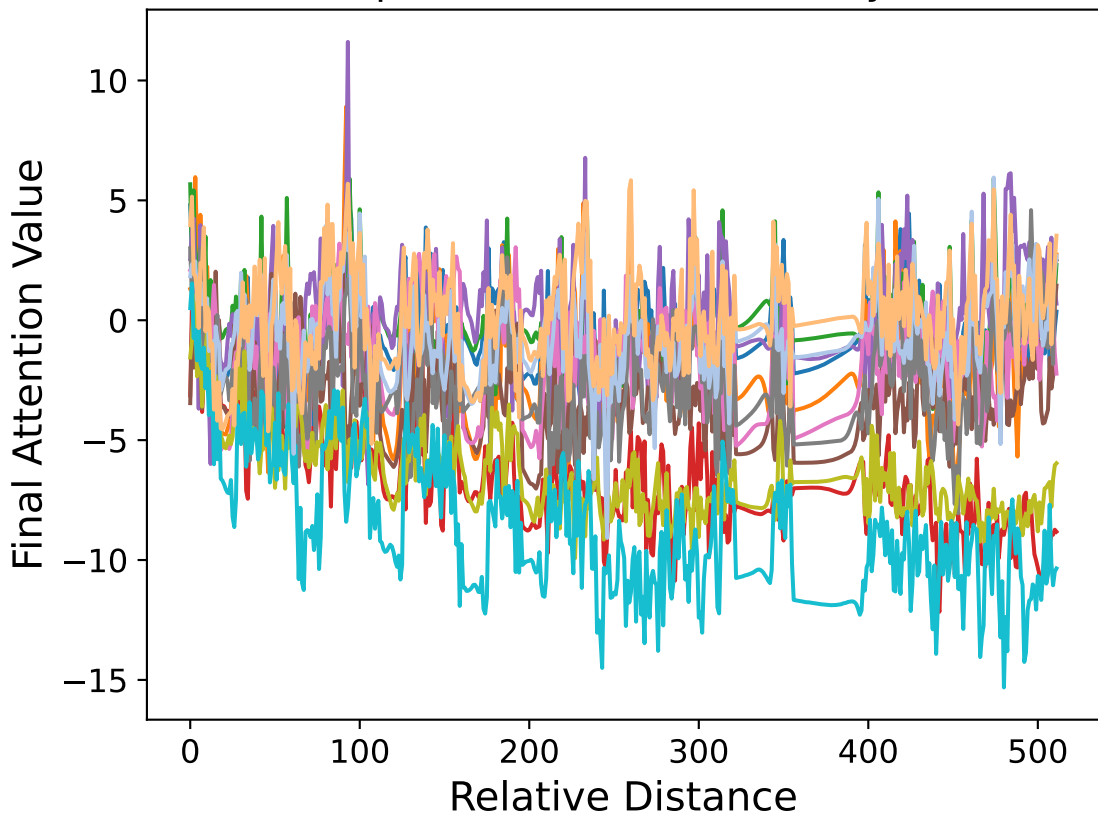

Supplement: supplementary_material [file attachment]
